# Supplementary material
Source: publisher site journal article supplement (http://www.dovepress.com/get_supplementary_file.php?f=224325.xlsx)
Supplement: Supplementary file 1 [file get_supplementary_file.php]

## Sheet: common target gene
Common gene in Targetscan, PITA, miRanda and PicTar
AKT3
SPEN
ZNF362
SRSF11
C1orf21
RIC8A
ARL2
PTHLH
PEX5
TXNDC17
PPM1D
OTX1
ACTR2
COPS7B
ZSWIM3
USP25
TRANK1
DENND6A
TTC14
TLL1
SESN1
MAP7
AVL9
DMTF1
EYA1
XPO7
PTCH1
EPB41L4B
APLN
DEDD
NFATC3
WDR82
AFF4
HSPG2
WNT4
BSDC1
CC2D1B
SERBP1
SYDE2
TGFBR3
EVI5
WDR47
RSBN1
CSDE1
UBE2Q1
ASH1L
HDGF
COP1
PHLDA3
SIPA1L2
UBE4B
KIF1B
CDC42
MTFR1L
PDIK1L
DHDDS
AGO1
AKIRIN1
AK4
ADGRL2
STXBP3
GNAI3
KCNC4
LRIG2
SUCO
LAMC1
NAV1
BTG2
RASSF5
G0S2
RCOR3
WNT3A
CUL2
CCDC6
WAPL
GLUD1
CPEB3
RAB11FIP2
CACUL1
EIF3A
RET
PCGF5
SLC35G1
BTRC
SHOC2
VTI1A
PLEKHA1
STK33
BDNF
ARFGAP2
C11orf68
SPTBN2
CHORDC1
CADM1
SRPRA
WEE1
ANO3
PTPRJ
ESRRA
CNIH2
PPP6R3
CCND1
TMEM135
AMOTL1
DIXDC1
SIDT2
CHEK1
VAMP1
SLC2A3
LRP6
WBP11
BHLHE41
SINHCAF
KIF21A
TUBA1A
CSRNP2
SPRYD3
ZBTB39
E2F7
CDK17
PRDM4
C12orf76
ATXN2
NAA25
HECTD4
CCND2
RIMKLB
ETNK1
EIF4B
HOXC11
KIF5A
USP15
HMGA2
DYRK2
OTOGL
CHPT1
LATS2
DCLK1
RUBCNL
KPNA3
PCDH9
DACH1
ZMYM2
AKAP11
PCDH17
SUPT16H
HECTD1
FBXO33
SOS2
FERMT2
ATG14
DCAF5
ANGEL1
IRF2BPL
SETD3
BAG5
CDCA4
BCL2L2
MIPOL1
PELI2
PLEKHH1
CALM1
PPP2R5C
TMEM87A
COPS2
SPRED1
CHAC1
SEMA6D
FGF7
RNF111
FAM81A
MAP2K1
KIF23
ISLR
SNX33
LITAF
DNAJA2
SIAH1
N4BP1
SALL1
DYNC1LI2
PHLPP2
ZFHX3
C16orf72
ATF7IP2
BFAR
UBFD1
RBBP6
CHD9
PLA2G15
CLUH
SPAG7
BORCS6
SLC25A35
SYNRG
MED1
VAT1
ATXN7L3
CDC27
RNF43
MTMR4
SMURF2
AXIN2
HELZ
CBX4
ARHGDIA
PAFAH1B1
ANKRD13B
CPD
NF1
SUZ12
CDK5R1
TAF15
MLLT6
MSL1
PSME3
NFE2L1
PPM1E
KCNJ2
KCTD1
GAREM1
SMAD7
BCL2
KDSR
DSEL
USP14
SEH1L
RNF125
RNF138
ZNF532
ZCCHC2
SOCS6
RANBP3
INSR
ADGRL1
MED26
ELL
DYRK1B
KCNN4
MAMSTR
FSD1
PNPLA6
SYDE1
CCNE1
RAB4B
MIA-RAB4B
RAB4B-EGLN2
EGLN2
AP2A1
PPP2R1A
MYT1L
YWHAQ
PDIA6
CYP26B1
LMAN2L
MGAT4A
LRP1B
COBLL1
LRP2
TLK1
IHH
PID1
RAB10
NRBP1
GPN1
CRIM1
PEX13
SMYD5
VAMP8
SOWAHC
CCNT2
ACVR2A
KIF5C
UBR3
GORASP2
MOB4
STRADB
RNF24
ELMO2
TMEM189-UBE2V1
UBE2V1
ZBTB46
ZCCHC3
CDS2
POLR3F
SYNDIG1
PHF20
TGIF2
APP
ADAMTS5
SYNJ1
SUMO3
SON
BACE2
PISD
CRKL
YWHAH
NUP50
RAF1
SLC4A7
LRRFIP2
HIGD1A
MAP4
CDC25A
PRKAR2A
USP19
DCP1A
LRIG1
RYBP
BTLA
KPNA1
MYLK
TMCC1
KPNA4
TBL1XR1
ATP13A3
RARB
PDCD6IP
CTDSPL
SNRK
TCAIM
RBM6
CDV3
TSC22D2
FRYL
KDR
CNOT6L
RASGEF1B
TSPAN5
EIF4E
OTUD4
FBXW7
CPEB2
DCUN1D4
PDLIM5
FGF2
HSPA4L
NAA15
SCOC
STOX2
ZNF622
PLPP1
ELL2
SPRY4
CCNJL
ITGA2
PAM
GRAMD2B
SLC12A2
ISOC1
SEC24A
SMAD5
PURA
PCDHA6
PCDHA9
PCDHA8
PCDHA7
PCDHA5
PCDHA4
PCDHA2
PCDHA1
PCDHA13
PCDHAC2
PCDHAC1
PCDHA11
PCDHA10
PCDHA12
PCDHA3
ADRB2
TENM2
WWC1
CREBRF
SRPK1
COL12A1
UBE2J1
EPHA7
GPR63
PNISR
CD164
SGK1
PLAGL1
DLL1
JARID2
RNF144B
E2F3
HMGA1
PIM1
VEGFA
CD2AP
FAM135A
SH3BGRL2
RNF217
RSPO3
TBPL1
MYB
CCDC28A
PHACTR2
PCMT1
IGF2R
MAP3K4
QKI
TBP
HNRNPA2B1
HOXA3
HOXA10
KBTBD2
POM121C
SEMA3A
SEMA3D
PDK4
SMURF1
RELN
SYPL1
WASL
KMT2C
WIPI2
USP42
POM121
CLDN12
ANKIB1
DYNC1I1
ZKSCAN1
CAPZA2
AHCYL2
ZYX
FGFR1
SLC20A2
PLAG1
MYBL1
SNX16
PIP4P2
RUNX1T1
HAS2
ZHX1
SLC7A2
C8orf58
ZFHX4
ZBTB10
WWP1
FAM91A1
PTPRD
B4GALT1
SPTLC1
ZNF367
PTPN3
PHF19
GOLGA1
PPP6C
CAMSAP1
KANK1
CDC37L1
LURAP1L
RECK
FAM122A
TLE4
PAPPA
PBX3
ZBTB43
ZBTB34
DOLPP1
RPS6KA3
TAB3
ARMCX2
TSC22D3
ACSL4
AMMECR1
TMEM255A
RAP2C
DDX3X
CLCN5
TSPYL2
OGT
ZNF449
SLC9A6
VMA21
LUZP1
WDTC1
UHMK1
PDCD4
FBXO21
SCN8A
PSKH1
EZH1
MIB1
PTPN4
RETREG2
DYRK1A
LCORL
CLOCK
CCND3
LATS1
CHIC1

## Sheet: original prediction data
Target gene prediction of miR-424-5p by using TargetScan, PITA, miRanda, and PicTar.
miRNAname	geneID	geneName	geneType	chromosome	narrowStart	narrowEnd	broadStart	broadEnd	strand	PITA	miRanda	PicTar	TargetScan
hsa-miR-424-5p	ENSG00000130826	DKC1	protein_coding	chrX	154004569	154004589	154004569	154004589	+	0	0	0	0
hsa-miR-424-5p	ENSG00000188976	NOC2L	protein_coding	chr1	879853	879858	879853	879858	-	1	0	0	0
hsa-miR-424-5p	ENSG00000188976	NOC2L	protein_coding	chr1	879877	879882	879877	879882	-	1	0	0	0
hsa-miR-424-5p	ENSG00000107404	DVL1	protein_coding	chr1	1270694	1270700	1270693	1270721	-	1	1	0	0
hsa-miR-424-5p	ENSG00000107404	DVL1	protein_coding	chr1	1270710	1270738	1270710	1270738	-	0	0	0	0
hsa-miR-424-5p	ENSG00000107404	DVL1	protein_coding	chr1	1271053	1271059	1271052	1271080	-	1	0	0	0
hsa-miR-424-5p	ENSG00000107404	DVL1	protein_coding	chr1	1271368	1271373	1271368	1271373	-	1	0	0	0
hsa-miR-424-5p	ENSG00000175756	AURKAIP1	protein_coding	chr1	1309149	1309155	1309148	1309169	-	0	1	0	0
hsa-miR-424-5p	ENSG00000160075	SSU72	protein_coding	chr1	1477057	1477063	1477056	1477074	-	1	1	0	0
hsa-miR-424-5p	ENSG00000008128	CDK11A	protein_coding	chr1	1635490	1635515	1635487	1635518	-	0	0	0	0
hsa-miR-424-5p	ENSG00000008128	CDK11A	protein_coding	chr1	1635683	1635711	1635683	1635711	-	0	0	0	0
hsa-miR-424-5p	ENSG00000008128	CDK11A	protein_coding	chr1	1635752	1635780	1635752	1635780	-	0	0	0	0
hsa-miR-424-5p	ENSG00000078369	GNB1	protein_coding	chr1	1717338	1717345	1717337	1717358	-	1	1	0	0
hsa-miR-424-5p	ENSG00000178821	TMEM52	protein_coding	chr1	1849174	1849177	1849171	1849179	-	2	0	0	0
hsa-miR-424-5p	ENSG00000197921	HES5	protein_coding	chr1	2460529	2460534	2460529	2460534	-	1	0	0	0
hsa-miR-424-5p	ENSG00000130764	LRRC47	protein_coding	chr1	3696837	3696843	3696837	3696843	-	1	0	0	0
hsa-miR-424-5p	ENSG00000116198	CEP104	protein_coding	chr1	3731859	3731864	3731859	3731864	-	1	0	0	0
hsa-miR-424-5p	ENSG00000198912	C1orf174	protein_coding	chr1	3806307	3806312	3806307	3806312	-	1	0	0	0
hsa-miR-424-5p	ENSG00000131697	NPHP4	protein_coding	chr1	5923132	5923135	5923129	5923137	-	2	0	0	0
hsa-miR-424-5p	ENSG00000116237	ICMT	protein_coding	chr1	6281640	6281645	6281640	6281645	-	1	0	0	0
hsa-miR-424-5p	ENSG00000116237	ICMT	protein_coding	chr1	6284266	6284272	6284266	6284272	-	1	0	0	0
hsa-miR-424-5p	ENSG00000158292	GPR153	protein_coding	chr1	6307826	6307832	6307825	6307853	-	0	1	1	1
hsa-miR-424-5p	ENSG00000158292	GPR153	protein_coding	chr1	6311498	6311526	6311498	6311526	-	0	0	0	0
hsa-miR-424-5p	ENSG00000097021	ACOT7	protein_coding	chr1	6324343	6324346	6324339	6324359	-	2	1	0	0
hsa-miR-424-5p	ENSG00000116285	ERRFI1	protein_coding	chr1	8072142	8072147	8072142	8072147	-	1	0	0	0
hsa-miR-424-5p	ENSG00000142599	RERE	protein_coding	chr1	8413741	8413746	8413741	8413746	-	1	0	0	0
hsa-miR-424-5p	ENSG00000180758	GPR157	protein_coding	chr1	9163830	9163858	9163830	9163858	-	0	0	0	0
hsa-miR-424-5p	ENSG00000180758	GPR157	protein_coding	chr1	9163881	9163909	9163881	9163909	-	0	0	0	0
hsa-miR-424-5p	ENSG00000180758	GPR157	protein_coding	chr1	9164596	9164618	9164590	9164624	-	0	0	0	0
hsa-miR-424-5p	ENSG00000180758	GPR157	protein_coding	chr1	9171377	9171405	9171377	9171405	-	0	0	0	0
hsa-miR-424-5p	ENSG00000180758	GPR157	protein_coding	chr1	9171416	9171444	9171416	9171444	-	0	0	0	0
hsa-miR-424-5p	ENSG00000180758	GPR157	protein_coding	chr1	9188934	9188962	9188934	9188962	-	0	0	0	0
hsa-miR-424-5p	ENSG00000180758	GPR157	protein_coding	chr1	9189027	9189055	9189027	9189055	-	0	0	0	0
hsa-miR-424-5p	ENSG00000171603	CLSTN1	protein_coding	chr1	9789221	9789226	9789221	9789226	-	1	0	0	0
hsa-miR-424-5p	ENSG00000171603	CLSTN1	protein_coding	chr1	9789431	9789437	9789431	9789437	-	1	0	0	0
hsa-miR-424-5p	ENSG00000171603	CLSTN1	protein_coding	chr1	9789850	9789856	9789850	9789856	-	1	0	0	0
hsa-miR-424-5p	ENSG00000178585	CTNNBIP1	protein_coding	chr1	9910174	9910180	9910173	9910196	-	1	1	0	1
hsa-miR-424-5p	ENSG00000178585	CTNNBIP1	protein_coding	chr1	9910372	9910377	9910372	9910377	-	1	0	0	0
hsa-miR-424-5p	ENSG00000130940	CASZ1	protein_coding	chr1	10697309	10697315	10697308	10697329	-	1	0	0	0
hsa-miR-424-5p	ENSG00000130940	CASZ1	protein_coding	chr1	10698417	10698422	10698417	10698422	-	1	0	0	0
hsa-miR-424-5p	ENSG00000171824	EXOSC10	protein_coding	chr1	11126721	11126727	11126720	11126739	-	1	1	0	0
hsa-miR-424-5p	ENSG00000177000	MTHFR	protein_coding	chr1	11847365	11847370	11847364	11847392	-	1	0	0	0
hsa-miR-424-5p	ENSG00000177000	MTHFR	protein_coding	chr1	11848415	11848443	11848415	11848443	-	0	0	0	0
hsa-miR-424-5p	ENSG00000177000	MTHFR	protein_coding	chr1	11848788	11848794	11848778	11848815	-	1	0	0	0
hsa-miR-424-5p	ENSG00000177000	MTHFR	protein_coding	chr1	11850141	11850147	11850140	11850168	-	1	0	0	0
hsa-miR-424-5p	ENSG00000177000	MTHFR	protein_coding	chr1	11850672	11850678	11850671	11850699	-	1	0	0	0
hsa-miR-424-5p	ENSG00000173641	HSPB7	protein_coding	chr1	16340945	16340951	16340944	16340965	-	1	1	0	0
hsa-miR-424-5p	ENSG00000159363	ATP13A2	protein_coding	chr1	17312490	17312496	17312489	17312517	-	1	1	0	0
hsa-miR-424-5p	ENSG00000159363	ATP13A2	protein_coding	chr1	17313003	17313028	17313000	17313031	-	0	0	0	0
hsa-miR-424-5p	ENSG00000159363	ATP13A2	protein_coding	chr1	17331965	17331993	17331965	17331993	-	0	0	0	0
hsa-miR-424-5p	ENSG00000169991	IFFO2	protein_coding	chr1	19234902	19234908	19234902	19234908	-	0	0	0	0
hsa-miR-424-5p	ENSG00000127483	HP1BP3	protein_coding	chr1	21069168	21069196	21069168	21069196	-	0	0	0	0
hsa-miR-424-5p	ENSG00000142798	HSPG2	protein_coding	chr1	22149103	22149108	22149103	22149108	-	1	0	0	0
hsa-miR-424-5p	ENSG00000142798	HSPG2	protein_coding	chr1	22149688	22149693	22149687	22149708	-	1	1	1	1
hsa-miR-424-5p	ENSG00000162552	WNT4	protein_coding	chr1	22443913	22443918	22443912	22443932	-	1	1	1	1
hsa-miR-424-5p	ENSG00000169641	LUZP1	protein_coding	chr1	23411863	23411869	23411862	23411890	-	1	0	1	1
hsa-miR-424-5p	ENSG00000169641	LUZP1	protein_coding	chr1	23411964	23411969	23411963	23411991	-	1	0	0	0
hsa-miR-424-5p	ENSG00000169641	LUZP1	protein_coding	chr1	23412940	23412946	23412939	23412967	-	1	1	0	0
hsa-miR-424-5p	ENSG00000169641	LUZP1	protein_coding	chr1	23413261	23413267	23413260	23413288	-	1	0	1	1
hsa-miR-424-5p	ENSG00000169641	LUZP1	protein_coding	chr1	23414618	23414624	23414617	23414645	-	1	0	1	1
hsa-miR-424-5p	ENSG00000125945	ZNF436	protein_coding	chr1	23688071	23688076	23688071	23688076	-	1	0	0	0
hsa-miR-424-5p	ENSG00000125945	ZNF436	protein_coding	chr1	23688376	23688404	23688376	23688404	-	0	0	0	0
hsa-miR-424-5p	ENSG00000088280	ASAP3	protein_coding	chr1	23763681	23763709	23763681	23763709	-	0	0	0	0
hsa-miR-424-5p	ENSG00000007968	E2F2	protein_coding	chr1	23834465	23834470	23834465	23834470	-	1	0	0	0
hsa-miR-424-5p	ENSG00000117318	ID3	protein_coding	chr1	23884627	23884632	23884627	23884632	-	1	0	0	0
hsa-miR-424-5p	ENSG00000117308	GALE	protein_coding	chr1	24122355	24122360	24122355	24122360	-	1	0	0	0
hsa-miR-424-5p	ENSG00000179163	FUCA1	protein_coding	chr1	24171725	24171730	24171725	24171730	-	1	0	0	0
hsa-miR-424-5p	ENSG00000179163	FUCA1	protein_coding	chr1	24172173	24172178	24172173	24172178	-	1	0	0	0
hsa-miR-424-5p	ENSG00000188529	SRSF10	protein_coding	chr1	24294298	24294304	24294298	24294304	-	0	0	0	1
hsa-miR-424-5p	ENSG00000185436	IFNLR1	protein_coding	chr1	24481865	24481871	24481864	24481892	-	1	0	0	0
hsa-miR-424-5p	ENSG00000185436	IFNLR1	protein_coding	chr1	24483581	24483587	24483580	24483608	-	1	0	0	0
hsa-miR-424-5p	ENSG00000158006	PAFAH2	protein_coding	chr1	26288121	26288124	26288117	26288148	-	2	0	0	0
hsa-miR-424-5p	ENSG00000158006	PAFAH2	protein_coding	chr1	26288343	26288349	26288342	26288370	-	1	1	0	0
hsa-miR-424-5p	ENSG00000090020	SLC9A1	protein_coding	chr1	27425373	27425401	27425373	27425401	-	0	0	0	0
hsa-miR-424-5p	ENSG00000090020	SLC9A1	protein_coding	chr1	27426113	27426118	27426112	27426140	-	1	0	0	0
hsa-miR-424-5p	ENSG00000090020	SLC9A1	protein_coding	chr1	27428249	27428277	27428249	27428277	-	0	0	0	0
hsa-miR-424-5p	ENSG00000158195	WASF2	protein_coding	chr1	27733428	27733434	27733428	27733434	-	1	0	0	0
hsa-miR-424-5p	ENSG00000158195	WASF2	protein_coding	chr1	27733569	27733575	27733569	27733575	-	1	0	0	0
hsa-miR-424-5p	ENSG00000134668	SPOCD1	protein_coding	chr1	32256811	32256817	32256810	32256838	-	0	0	0	1
hsa-miR-424-5p	ENSG00000160058	BSDC1	protein_coding	chr1	32831107	32831113	32831106	32831125	-	1	1	1	1
hsa-miR-424-5p	ENSG00000134686	PHC2	protein_coding	chr1	33790556	33790575	33790556	33790575	-	0	1	0	0
hsa-miR-424-5p	ENSG00000243749	TMEM35B	protein_coding	chr1	35449429	35449450	35449429	35449450	-	0	1	0	0
hsa-miR-424-5p	ENSG00000271741	AC114490.2	protein_coding	chr1	35449429	35449450	35449429	35449450	-	0	1	0	0
hsa-miR-424-5p	ENSG00000142687	KIAA0319L	protein_coding	chr1	35899300	35899305	35899300	35899305	-	1	0	0	0
hsa-miR-424-5p	ENSG00000142687	KIAA0319L	protein_coding	chr1	35899501	35899507	35899501	35899507	-	1	0	0	1
hsa-miR-424-5p	ENSG00000142687	KIAA0319L	protein_coding	chr1	35900198	35900203	35900198	35900203	-	1	0	0	0
hsa-miR-424-5p	ENSG00000142687	KIAA0319L	protein_coding	chr1	35900413	35900418	35900413	35900418	-	1	0	0	0
hsa-miR-424-5p	ENSG00000142686	C1orf216	protein_coding	chr1	36180448	36180453	36180448	36180453	-	1	0	0	0
hsa-miR-424-5p	ENSG00000196182	STK40	protein_coding	chr1	36805513	36805518	36805513	36805518	-	1	0	0	0
hsa-miR-424-5p	ENSG00000196182	STK40	protein_coding	chr1	36806983	36806988	36806983	36806988	-	1	0	0	0
hsa-miR-424-5p	ENSG00000116885	OSCP1	protein_coding	chr1	36883651	36883657	36883650	36883668	-	1	1	0	1
hsa-miR-424-5p	ENSG00000163877	SNIP1	protein_coding	chr1	38002074	38002081	38002074	38002081	-	0	0	0	1
hsa-miR-424-5p	ENSG00000163877	SNIP1	protein_coding	chr1	38002300	38002306	38002299	38002327	-	1	1	0	0
hsa-miR-424-5p	ENSG00000196449	YRDC	protein_coding	chr1	38268638	38268644	38268637	38268665	-	1	1	0	1
hsa-miR-424-5p	ENSG00000196449	YRDC	protein_coding	chr1	38269429	38269457	38269429	38269457	-	0	0	0	0
hsa-miR-424-5p	ENSG00000183431	SF3A3	protein_coding	chr1	38423468	38423471	38423464	38423485	-	2	1	0	0
hsa-miR-424-5p	ENSG00000116954	RRAGC	protein_coding	chr1	39305140	39305143	39305136	39305159	-	2	1	0	0
hsa-miR-424-5p	ENSG00000214114	MYCBP	protein_coding	chr1	39332653	39332659	39332653	39332659	-	0	0	0	1
hsa-miR-424-5p	ENSG00000274944	AL139260.3	protein_coding	chr1	39332653	39332659	39332653	39332659	-	0	0	0	1
hsa-miR-424-5p	ENSG00000043514	TRIT1	protein_coding	chr1	40306812	40306817	40306812	40306817	-	1	0	0	0
hsa-miR-424-5p	ENSG00000131238	PPT1	protein_coding	chr1	40538522	40538528	40538521	40538543	-	1	1	0	0
hsa-miR-424-5p	ENSG00000117016	RIMS3	protein_coding	chr1	41088146	41088152	41088145	41088173	-	1	1	0	1
hsa-miR-424-5p	ENSG00000010803	SCMH1	protein_coding	chr1	41493648	41493654	41493648	41493654	-	1	0	0	0
hsa-miR-424-5p	ENSG00000066322	ELOVL1	protein_coding	chr1	43829113	43829118	43829113	43829118	-	1	0	0	0
hsa-miR-424-5p	ENSG00000066322	ELOVL1	protein_coding	chr1	43829437	43829442	43829437	43829442	-	1	0	0	0
hsa-miR-424-5p	ENSG00000196517	SLC6A9	protein_coding	chr1	44462615	44462620	44462615	44462620	-	1	0	0	0
hsa-miR-424-5p	ENSG00000196517	SLC6A9	protein_coding	chr1	44463099	44463104	44463099	44463104	-	1	0	0	0
hsa-miR-424-5p	ENSG00000162415	ZSWIM5	protein_coding	chr1	45482729	45482734	45482729	45482734	-	1	0	0	0
hsa-miR-424-5p	ENSG00000159592	GPBP1L1	protein_coding	chr1	46093464	46093469	46093463	46093484	-	1	1	0	0
hsa-miR-424-5p	ENSG00000079277	MKNK1	protein_coding	chr1	47023592	47023598	47023591	47023619	-	1	1	0	1
hsa-miR-424-5p	ENSG00000079277	MKNK1	protein_coding	chr1	47037759	47037787	47037759	47037787	-	0	0	0	0
hsa-miR-424-5p	ENSG00000159658	EFCAB14	protein_coding	chr1	47141578	47141584	47141577	47141598	-	1	1	0	0
hsa-miR-424-5p	ENSG00000269113	TRABD2B	protein_coding	chr1	48231005	48231011	48231005	48231012	-	0	0	1	1
hsa-miR-424-5p	ENSG00000169213	RAB3B	protein_coding	chr1	52385464	52385470	52385463	52385484	-	1	1	0	0
hsa-miR-424-5p	ENSG00000154222	CC2D1B	protein_coding	chr1	52816899	52816905	52816898	52816926	-	1	1	0	0
hsa-miR-424-5p	ENSG00000154222	CC2D1B	protein_coding	chr1	52818367	52818395	52818367	52818395	-	0	0	0	0
hsa-miR-424-5p	ENSG00000154222	CC2D1B	protein_coding	chr1	52818794	52818799	52818793	52818821	-	1	1	1	1
hsa-miR-424-5p	ENSG00000154222	CC2D1B	protein_coding	chr1	52828377	52828405	52828377	52828405	-	0	0	0	0
hsa-miR-424-5p	ENSG00000162377	COA7	protein_coding	chr1	53158431	53158452	53158431	53158452	-	0	0	0	0
hsa-miR-424-5p	ENSG00000157193	LRP8	protein_coding	chr1	53711813	53711818	53711813	53711818	-	1	0	0	0
hsa-miR-424-5p	ENSG00000157193	LRP8	protein_coding	chr1	53793537	53793541	53793513	53793565	-	0	0	0	0
hsa-miR-424-5p	ENSG00000116133	DHCR24	protein_coding	chr1	55315332	55315337	55315332	55315337	-	1	0	0	0
hsa-miR-424-5p	ENSG00000116133	DHCR24	protein_coding	chr1	55316987	55316992	55316987	55316992	-	1	0	0	0
hsa-miR-424-5p	ENSG00000116133	DHCR24	protein_coding	chr1	55317834	55317839	55317834	55317839	-	1	0	0	0
hsa-miR-424-5p	ENSG00000162402	USP24	protein_coding	chr1	55533289	55533294	55533288	55533316	-	1	0	0	0
hsa-miR-424-5p	ENSG00000162402	USP24	protein_coding	chr1	55534602	55534607	55534601	55534629	-	1	0	0	0
hsa-miR-424-5p	ENSG00000162402	USP24	protein_coding	chr1	55591007	55591035	55591007	55591035	-	0	0	0	0
hsa-miR-424-5p	ENSG00000162402	USP24	protein_coding	chr1	55604647	55604675	55604647	55604675	-	0	0	0	0
hsa-miR-424-5p	ENSG00000162407	PLPP3	protein_coding	chr1	56960691	56960696	56960690	56960718	-	1	1	0	0
hsa-miR-424-5p	ENSG00000162407	PLPP3	protein_coding	chr1	56961919	56961924	56961918	56961946	-	1	0	0	0
hsa-miR-424-5p	ENSG00000162407	PLPP3	protein_coding	chr1	56962162	56962168	56962161	56962189	-	1	1	0	1
hsa-miR-424-5p	ENSG00000162407	PLPP3	protein_coding	chr1	57044582	57044610	57044582	57044610	-	0	0	0	0
hsa-miR-424-5p	ENSG00000142864	SERBP1	protein_coding	chr1	67878604	67878610	67878603	67878631	-	1	1	1	1
hsa-miR-424-5p	ENSG00000172380	GNG12	protein_coding	chr1	68168491	68168497	68168490	68168510	-	1	1	0	0
hsa-miR-424-5p	ENSG00000172380	GNG12	protein_coding	chr1	68170161	68170166	68170161	68170166	-	1	0	0	0
hsa-miR-424-5p	ENSG00000036549	AC118549.1	protein_coding	chr1	78030795	78030800	78030794	78030815	-	1	1	0	0
hsa-miR-424-5p	ENSG00000097096	SYDE2	protein_coding	chr1	85623667	85623672	85623666	85623688	-	1	1	1	1
hsa-miR-424-5p	ENSG00000097096	SYDE2	protein_coding	chr1	85623744	85623749	85623744	85623749	-	1	0	0	0
hsa-miR-424-5p	ENSG00000117174	ZNHIT6	protein_coding	chr1	86115577	86115583	86115576	86115604	-	0	0	0	0
hsa-miR-424-5p	ENSG00000137944	KYAT3	protein_coding	chr1	89401905	89401911	89401905	89401911	-	0	0	0	0
hsa-miR-424-5p	ENSG00000069702	TGFBR3	protein_coding	chr1	92148977	92148983	92148976	92148997	-	1	1	1	1
hsa-miR-424-5p	ENSG00000067208	EVI5	protein_coding	chr1	92974559	92974565	92974558	92974577	-	1	1	1	1
hsa-miR-424-5p	ENSG00000085491	SLC25A24	protein_coding	chr1	108742158	108742163	108742158	108742163	-	0	0	0	0
hsa-miR-424-5p	ENSG00000121940	CLCC1	protein_coding	chr1	109473226	109473231	109473226	109473231	-	1	0	0	0
hsa-miR-424-5p	ENSG00000085433	WDR47	protein_coding	chr1	109513848	109513854	109513847	109513875	-	1	1	1	1
hsa-miR-424-5p	ENSG00000134243	SORT1	protein_coding	chr1	109855645	109855651	109855644	109855672	-	1	0	0	0
hsa-miR-424-5p	ENSG00000134243	SORT1	protein_coding	chr1	109856543	109856549	109856542	109856570	-	1	0	0	1
hsa-miR-424-5p	ENSG00000181754	AMIGO1	protein_coding	chr1	110048981	110048987	110048980	110049008	-	0	0	0	1
hsa-miR-424-5p	ENSG00000181754	AMIGO1	protein_coding	chr1	110051115	110051140	110051112	110051143	-	0	0	0	0
hsa-miR-424-5p	ENSG00000181754	AMIGO1	protein_coding	chr1	110051256	110051278	110051256	110051284	-	0	0	0	0
hsa-miR-424-5p	ENSG00000121931	LRIF1	protein_coding	chr1	111489913	111489919	111489912	111489934	-	1	1	0	0
hsa-miR-424-5p	ENSG00000155380	SLC16A1	protein_coding	chr1	113454647	113454653	113454646	113454666	-	1	1	0	0
hsa-miR-424-5p	ENSG00000081019	RSBN1	protein_coding	chr1	114307224	114307230	114307223	114307251	-	1	1	1	0
hsa-miR-424-5p	ENSG00000081019	RSBN1	protein_coding	chr1	114308377	114308382	114308376	114308404	-	1	1	1	1
hsa-miR-424-5p	ENSG00000081019	RSBN1	protein_coding	chr1	114340137	114340165	114340137	114340165	-	0	0	0	0
hsa-miR-424-5p	ENSG00000116752	BCAS2	protein_coding	chr1	115110611	115110616	115110611	115110616	-	1	0	0	0
hsa-miR-424-5p	ENSG00000175984	DENND2C	protein_coding	chr1	115125600	115125605	115125599	115125627	-	0	0	0	0
hsa-miR-424-5p	ENSG00000175984	DENND2C	protein_coding	chr1	115128065	115128068	115128061	115128089	-	2	1	0	1
hsa-miR-424-5p	ENSG00000009307	CSDE1	protein_coding	chr1	115259999	115260002	115259996	115260026	-	2	1	1	2
hsa-miR-424-5p	ENSG00000116815	CD58	protein_coding	chr1	117057309	117057314	117057309	117057314	-	1	0	0	0
hsa-miR-424-5p	ENSG00000143061	IGSF3	protein_coding	chr1	117118087	117118092	117118087	117118092	-	1	0	0	0
hsa-miR-424-5p	ENSG00000143061	IGSF3	protein_coding	chr1	117118406	117118412	117118406	117118412	-	1	0	0	0
hsa-miR-424-5p	ENSG00000143061	IGSF3	protein_coding	chr1	117119084	117119089	117119084	117119089	-	1	0	0	0
hsa-miR-424-5p	ENSG00000143061	IGSF3	protein_coding	chr1	117119097	117119102	117119097	117119102	-	1	0	0	0
hsa-miR-424-5p	ENSG00000134253	TRIM45	protein_coding	chr1	117653817	117653822	117653817	117653822	-	1	0	0	0
hsa-miR-424-5p	ENSG00000134258	VTCN1	protein_coding	chr1	117686713	117686741	117686713	117686741	-	0	0	0	0
hsa-miR-424-5p	ENSG00000116874	WARS2	protein_coding	chr1	119575000	119575005	119575000	119575005	-	1	0	0	0
hsa-miR-424-5p	ENSG00000143067	ZNF697	protein_coding	chr1	120162805	120162810	120162805	120162810	-	1	0	0	0
hsa-miR-424-5p	ENSG00000143067	ZNF697	protein_coding	chr1	120163862	120163867	120163862	120163867	-	1	0	0	0
hsa-miR-424-5p	ENSG00000143067	ZNF697	protein_coding	chr1	120164758	120164763	120164757	120164763	-	1	0	1	1
hsa-miR-424-5p	ENSG00000134250	NOTCH2	protein_coding	chr1	120456648	120456654	120456647	120456675	-	1	0	0	0
hsa-miR-424-5p	ENSG00000134250	NOTCH2	protein_coding	chr1	120457879	120457885	120457878	120457906	-	1	1	0	1
hsa-miR-424-5p	ENSG00000134250	NOTCH2	protein_coding	chr1	120458150	120458178	120458150	120458178	-	0	0	0	0
hsa-miR-424-5p	ENSG00000134250	NOTCH2	protein_coding	chr1	120466510	120466532	120466510	120466538	-	0	0	0	0
hsa-miR-424-5p	ENSG00000134250	NOTCH2	protein_coding	chr1	120491690	120491718	120491690	120491718	-	0	0	0	0
hsa-miR-424-5p	ENSG00000131791	PRKAB2	protein_coding	chr1	146626854	146626859	146626853	146626881	-	1	0	0	0
hsa-miR-424-5p	ENSG00000131791	PRKAB2	protein_coding	chr1	146627971	146627977	146627970	146627998	-	1	1	0	1
hsa-miR-424-5p	ENSG00000131791	PRKAB2	protein_coding	chr1	146628259	146628265	146628258	146628286	-	1	0	0	0
hsa-miR-424-5p	ENSG00000184678	HIST2H2BE	protein_coding	chr1	149857548	149857554	149857547	149857568	-	1	1	0	0
hsa-miR-424-5p	ENSG00000184678	HIST2H2BE	protein_coding	chr1	149857764	149857769	149857764	149857769	-	1	0	0	0
hsa-miR-424-5p	ENSG00000159164	SV2A	protein_coding	chr1	149875323	149875328	149875323	149875328	-	1	0	0	0
hsa-miR-424-5p	ENSG00000014914	MTMR11	protein_coding	chr1	149901540	149901568	149901540	149901568	-	0	0	0	0
hsa-miR-424-5p	ENSG00000014914	MTMR11	protein_coding	chr1	149901588	149901591	149901584	149901615	-	0	0	0	0
hsa-miR-424-5p	ENSG00000264522	OTUD7B	protein_coding	chr1	149914784	149914789	149914784	149914789	-	1	0	0	0
hsa-miR-424-5p	ENSG00000143401	ANP32E	protein_coding	chr1	150191415	150191421	150191414	150191436	-	1	1	0	0
hsa-miR-424-5p	ENSG00000143420	ENSA	protein_coding	chr1	150596975	150596980	150596974	150596980	-	1	0	1	0
hsa-miR-424-5p	ENSG00000143420	ENSA	protein_coding	chr1	150597659	150597664	150597659	150597664	-	1	0	0	0
hsa-miR-424-5p	ENSG00000143437	ARNT	protein_coding	chr1	150783643	150783649	150783642	150783665	-	1	1	0	0
hsa-miR-424-5p	ENSG00000143409	MINDY1	protein_coding	chr1	150969585	150969591	150969585	150969591	-	1	0	0	1
hsa-miR-424-5p	ENSG00000143393	PI4KB	protein_coding	chr1	151264878	151264884	151264877	151264905	-	1	0	1	1
hsa-miR-424-5p	ENSG00000143416	SELENBP1	protein_coding	chr1	151336833	151336839	151336832	151336860	-	1	1	0	0
hsa-miR-424-5p	ENSG00000143416	SELENBP1	protein_coding	chr1	151338257	151338285	151338257	151338285	-	0	0	0	0
hsa-miR-424-5p	ENSG00000143442	POGZ	protein_coding	chr1	151400185	151400190	151400185	151400190	-	1	0	0	0
hsa-miR-424-5p	ENSG00000182134	TDRKH	protein_coding	chr1	151746772	151746777	151746772	151746777	-	1	0	0	0
hsa-miR-424-5p	ENSG00000143614	GATAD2B	protein_coding	chr1	153777329	153777335	153777328	153777356	-	1	0	0	0
hsa-miR-424-5p	ENSG00000143614	GATAD2B	protein_coding	chr1	153780027	153780032	153780026	153780054	-	1	0	0	0
hsa-miR-424-5p	ENSG00000198837	DENND4B	protein_coding	chr1	153901989	153901994	153901988	153902011	-	1	1	0	0
hsa-miR-424-5p	ENSG00000143570	SLC39A1	protein_coding	chr1	153931821	153931827	153931820	153931848	-	1	1	0	0
hsa-miR-424-5p	ENSG00000143570	SLC39A1	protein_coding	chr1	153932229	153932234	153932228	153932256	-	1	0	0	0
hsa-miR-424-5p	ENSG00000143570	SLC39A1	protein_coding	chr1	153932901	153932929	153932901	153932929	-	0	0	0	0
hsa-miR-424-5p	ENSG00000143570	SLC39A1	protein_coding	chr1	153935081	153935106	153935078	153935109	-	0	0	0	0
hsa-miR-424-5p	ENSG00000143549	TPM3	protein_coding	chr1	154129240	154129245	154129239	154129267	-	1	0	0	0
hsa-miR-424-5p	ENSG00000143549	TPM3	protein_coding	chr1	154130001	154130006	154130000	154130028	-	1	0	0	0
hsa-miR-424-5p	ENSG00000143549	TPM3	protein_coding	chr1	154130090	154130093	154130086	154130114	-	2	1	0	0
hsa-miR-424-5p	ENSG00000143549	TPM3	protein_coding	chr1	154131161	154131167	154131160	154131181	-	1	1	0	0
hsa-miR-424-5p	ENSG00000143549	TPM3	protein_coding	chr1	154140228	154140233	154140228	154140233	-	1	0	0	0
hsa-miR-424-5p	ENSG00000143549	TPM3	protein_coding	chr1	154144513	154144541	154144513	154144541	-	0	0	0	0
hsa-miR-424-5p	ENSG00000143612	C1orf43	protein_coding	chr1	154179866	154179871	154179866	154179871	-	1	0	0	0
hsa-miR-424-5p	ENSG00000160714	UBE2Q1	protein_coding	chr1	154521324	154521330	154521323	154521351	-	1	1	1	1
hsa-miR-424-5p	ENSG00000160714	UBE2Q1	protein_coding	chr1	154521365	154521371	154521364	154521392	-	1	1	0	1
hsa-miR-424-5p	ENSG00000160714	UBE2Q1	protein_coding	chr1	154522106	154522111	154522105	154522133	-	1	0	0	0
hsa-miR-424-5p	ENSG00000160714	UBE2Q1	protein_coding	chr1	154522330	154522336	154522329	154522357	-	1	1	0	0
hsa-miR-424-5p	ENSG00000160710	ADAR	protein_coding	chr1	154555705	154555711	154555704	154555732	-	1	1	0	0
hsa-miR-424-5p	ENSG00000160710	ADAR	protein_coding	chr1	154556528	154556533	154556527	154556555	-	1	0	0	0
hsa-miR-424-5p	ENSG00000160710	ADAR	protein_coding	chr1	154569324	154569352	154569324	154569352	-	0	0	0	0
hsa-miR-424-5p	ENSG00000163348	PYGO2	protein_coding	chr1	154929729	154929734	154929729	154929734	-	1	0	0	0
hsa-miR-424-5p	ENSG00000163348	PYGO2	protein_coding	chr1	154930017	154930022	154930017	154930022	-	1	0	0	0
hsa-miR-424-5p	ENSG00000185499	MUC1	protein_coding	chr1	155158490	155158495	155158490	155158495	-	1	0	0	0
hsa-miR-424-5p	ENSG00000177628	GBA	protein_coding	chr1	155204527	155204552	155204527	155204552	-	0	1	0	0
hsa-miR-424-5p	ENSG00000160767	FAM189B	protein_coding	chr1	155217402	155217406	155217399	155217430	-	1	0	0	0
hsa-miR-424-5p	ENSG00000160767	FAM189B	protein_coding	chr1	155217413	155217419	155217412	155217440	-	1	1	0	1
hsa-miR-424-5p	ENSG00000116521	SCAMP3	protein_coding	chr1	155226147	155226169	155226147	155226175	-	0	1	0	0
hsa-miR-424-5p	ENSG00000116521	SCAMP3	protein_coding	chr1	155226519	155226547	155226519	155226547	-	0	0	0	0
hsa-miR-424-5p	ENSG00000116539	ASH1L	protein_coding	chr1	155305221	155305226	155305220	155305248	-	1	1	1	1
hsa-miR-424-5p	ENSG00000116539	ASH1L	protein_coding	chr1	155307082	155307087	155307081	155307109	-	1	0	0	0
hsa-miR-424-5p	ENSG00000116539	ASH1L	protein_coding	chr1	155313981	155314009	155313981	155314009	-	0	0	0	0
hsa-miR-424-5p	ENSG00000116584	ARHGEF2	protein_coding	chr1	155917338	155917343	155917338	155917343	-	1	0	0	0
hsa-miR-424-5p	ENSG00000160803	UBQLN4	protein_coding	chr1	156005262	156005267	156005262	156005267	-	1	0	0	0
hsa-miR-424-5p	ENSG00000254726	MEX3A	protein_coding	chr1	156044869	156044876	156044869	156044876	-	1	0	0	0
hsa-miR-424-5p	ENSG00000198952	SMG5	protein_coding	chr1	156219437	156219442	156219436	156219464	-	1	0	0	0
hsa-miR-424-5p	ENSG00000198952	SMG5	protein_coding	chr1	156220245	156220250	156220244	156220272	-	1	0	0	0
hsa-miR-424-5p	ENSG00000198952	SMG5	protein_coding	chr1	156231142	156231170	156231142	156231170	-	0	0	0	0
hsa-miR-424-5p	ENSG00000116604	MEF2D	protein_coding	chr1	156435296	156435301	156435296	156435301	-	1	0	0	0
hsa-miR-424-5p	ENSG00000160818	GPATCH4	protein_coding	chr1	156564630	156564635	156564630	156564635	-	1	0	0	0
hsa-miR-424-5p	ENSG00000143321	HDGF	protein_coding	chr1	156713198	156713204	156713197	156713225	-	1	1	1	1
hsa-miR-424-5p	ENSG00000027869	SH2D2A	protein_coding	chr1	156776134	156776140	156776133	156776161	-	1	1	0	1
hsa-miR-424-5p	ENSG00000132694	ARHGEF11	protein_coding	chr1	156905231	156905236	156905231	156905236	-	1	0	0	0
hsa-miR-424-5p	ENSG00000117036	ETV3	protein_coding	chr1	157092320	157092326	157092320	157092326	-	0	0	0	1
hsa-miR-424-5p	ENSG00000132693	CRP	protein_coding	chr1	159682306	159682312	159682305	159682327	-	1	1	0	0
hsa-miR-424-5p	ENSG00000213085	CFAP45	protein_coding	chr1	159842199	159842205	159842198	159842226	-	1	1	0	1
hsa-miR-424-5p	ENSG00000132716	DCAF8	protein_coding	chr1	160185650	160185655	160185649	160185677	-	1	1	0	0
hsa-miR-424-5p	ENSG00000132716	DCAF8	protein_coding	chr1	160185823	160185829	160185822	160185850	-	1	1	0	1
hsa-miR-424-5p	ENSG00000132716	DCAF8	protein_coding	chr1	160186056	160186061	160186055	160186083	-	1	0	0	0
hsa-miR-424-5p	ENSG00000162735	PEX19	protein_coding	chr1	160246775	160246781	160246774	160246795	-	1	1	0	0
hsa-miR-424-5p	ENSG00000122218	COPA	protein_coding	chr1	160259507	160259512	160259507	160259512	-	1	0	0	0
hsa-miR-424-5p	ENSG00000117091	CD48	protein_coding	chr1	160648731	160648737	160648730	160648752	-	1	1	0	0
hsa-miR-424-5p	ENSG00000158769	F11R	protein_coding	chr1	160967983	160967988	160967983	160967988	-	1	0	0	0
hsa-miR-424-5p	ENSG00000270149	AL591806.3	protein_coding	chr1	160967983	160967988	160967983	160967988	-	1	0	0	0
hsa-miR-424-5p	ENSG00000158773	USF1	protein_coding	chr1	161009767	161009795	161009767	161009795	-	0	0	0	0
hsa-miR-424-5p	ENSG00000158773	USF1	protein_coding	chr1	161011498	161011526	161011498	161011526	-	0	0	0	0
hsa-miR-424-5p	ENSG00000158773	USF1	protein_coding	chr1	161011576	161011604	161011576	161011604	-	0	0	0	0
hsa-miR-424-5p	ENSG00000158796	DEDD	protein_coding	chr1	161090819	161090825	161090818	161090846	-	1	1	1	0
hsa-miR-424-5p	ENSG00000158796	DEDD	protein_coding	chr1	161091399	161091402	161091395	161091423	-	1	0	2	1
hsa-miR-424-5p	ENSG00000158859	ADAMTS4	protein_coding	chr1	161165971	161165977	161165970	161165991	-	0	1	0	1
hsa-miR-424-5p	ENSG00000158859	ADAMTS4	protein_coding	chr1	161168304	161168325	161168304	161168325	-	0	0	0	0
hsa-miR-424-5p	ENSG00000143248	RGS5	protein_coding	chr1	163116363	163116369	163116362	163116384	-	1	1	0	0
hsa-miR-424-5p	ENSG00000143162	CREG1	protein_coding	chr1	167510576	167510582	167510575	167510596	-	1	1	0	0
hsa-miR-424-5p	ENSG00000117479	SLC19A2	protein_coding	chr1	169433867	169433872	169433866	169433894	-	1	0	0	0
hsa-miR-424-5p	ENSG00000117479	SLC19A2	protein_coding	chr1	169437979	169438007	169437979	169438007	-	0	0	0	0
hsa-miR-424-5p	ENSG00000117479	SLC19A2	protein_coding	chr1	169439241	169439269	169439241	169439269	-	0	0	0	0
hsa-miR-424-5p	ENSG00000117479	SLC19A2	protein_coding	chr1	169446852	169446880	169446852	169446880	-	0	0	0	0
hsa-miR-424-5p	ENSG00000143207	COP1	protein_coding	chr1	175914057	175914063	175914056	175914084	-	1	1	1	1
hsa-miR-424-5p	ENSG00000143322	ABL2	protein_coding	chr1	179074530	179074536	179074529	179074557	-	1	0	1	1
hsa-miR-424-5p	ENSG00000143322	ABL2	protein_coding	chr1	179074835	179074841	179074834	179074862	-	1	0	0	0
hsa-miR-424-5p	ENSG00000143322	ABL2	protein_coding	chr1	179076331	179076337	179076330	179076358	-	1	0	0	1
hsa-miR-424-5p	ENSG00000143322	ABL2	protein_coding	chr1	179076520	179076525	179076519	179076547	-	1	0	0	0
hsa-miR-424-5p	ENSG00000143322	ABL2	protein_coding	chr1	179077875	179077903	179077875	179077903	-	0	0	0	0
hsa-miR-424-5p	ENSG00000143322	ABL2	protein_coding	chr1	179087784	179087812	179087784	179087812	-	0	0	0	0
hsa-miR-424-5p	ENSG00000135823	STX6	protein_coding	chr1	180944367	180944372	180944367	180944372	-	1	0	0	0
hsa-miR-424-5p	ENSG00000143333	RGS16	protein_coding	chr1	182568280	182568285	182568280	182568285	-	1	0	0	0
hsa-miR-424-5p	ENSG00000116679	IVNS1ABP	protein_coding	chr1	185266006	185266012	185266005	185266033	-	1	1	0	0
hsa-miR-424-5p	ENSG00000116679	IVNS1ABP	protein_coding	chr1	185266074	185266080	185266073	185266101	-	1	1	0	0
hsa-miR-424-5p	ENSG00000073756	PTGS2	protein_coding	chr1	186645191	186645219	186645191	186645219	-	0	0	0	0
hsa-miR-424-5p	ENSG00000162687	KCNT2	protein_coding	chr1	196196981	196196984	196196977	196197008	-	2	1	0	0
hsa-miR-424-5p	ENSG00000162687	KCNT2	protein_coding	chr1	196300299	196300327	196300299	196300327	-	0	0	0	0
hsa-miR-424-5p	ENSG00000177888	ZBTB41	protein_coding	chr1	197128408	197128413	197128407	197128413	-	1	0	1	0
hsa-miR-424-5p	ENSG00000213047	DENND1B	protein_coding	chr1	197476114	197476119	197476113	197476120	-	0	0	1	0
hsa-miR-424-5p	ENSG00000213047	DENND1B	protein_coding	chr1	197476204	197476209	197476204	197476209	-	0	0	0	0
hsa-miR-424-5p	ENSG00000116852	KIF21B	protein_coding	chr1	200943139	200943167	200943139	200943167	-	0	0	0	0
hsa-miR-424-5p	ENSG00000116852	KIF21B	protein_coding	chr1	200943973	200944001	200943973	200944001	-	0	0	0	0
hsa-miR-424-5p	ENSG00000174307	PHLDA3	protein_coding	chr1	201434805	201434811	201434804	201434832	-	1	1	1	1
hsa-miR-424-5p	ENSG00000174307	PHLDA3	protein_coding	chr1	201434841	201434846	201434840	201434868	-	1	0	0	0
hsa-miR-424-5p	ENSG00000163431	LMOD1	protein_coding	chr1	201866830	201866836	201866829	201866857	-	1	1	0	0
hsa-miR-424-5p	ENSG00000117139	KDM5B	protein_coding	chr1	202697247	202697252	202697247	202697252	-	1	0	0	0
hsa-miR-424-5p	ENSG00000133056	PIK3C2B	protein_coding	chr1	204391982	204391987	204391982	204391987	-	1	0	0	0
hsa-miR-424-5p	ENSG00000133056	PIK3C2B	protein_coding	chr1	204392883	204392889	204392883	204392889	-	1	0	0	0
hsa-miR-424-5p	ENSG00000163545	NUAK2	protein_coding	chr1	205271506	205271511	205271505	205271533	-	1	0	0	0
hsa-miR-424-5p	ENSG00000163545	NUAK2	protein_coding	chr1	205271626	205271632	205271625	205271653	-	1	1	1	0
hsa-miR-424-5p	ENSG00000158711	ELK4	protein_coding	chr1	205577422	205577428	205577422	205577428	-	0	0	0	1
hsa-miR-424-5p	ENSG00000069275	NUCKS1	protein_coding	chr1	205684657	205684660	205684654	205684663	-	0	0	1	2
hsa-miR-424-5p	ENSG00000069275	NUCKS1	protein_coding	chr1	205686032	205686038	205686032	205686038	-	0	0	0	0
hsa-miR-424-5p	ENSG00000069275	NUCKS1	protein_coding	chr1	205686099	205686105	205686099	205686105	-	0	0	0	1
hsa-miR-424-5p	ENSG00000069275	NUCKS1	protein_coding	chr1	205686226	205686232	205686226	205686232	-	0	0	0	1
hsa-miR-424-5p	ENSG00000180667	YOD1	protein_coding	chr1	207217349	207217354	207217348	207217376	-	1	0	1	1
hsa-miR-424-5p	ENSG00000076356	PLXNA2	protein_coding	chr1	208200280	208200286	208200279	208200307	-	1	0	1	1
hsa-miR-424-5p	ENSG00000076356	PLXNA2	protein_coding	chr1	208391184	208391212	208391184	208391212	-	0	0	0	0
hsa-miR-424-5p	ENSG00000196482	ESRRG	protein_coding	chr1	216678503	216678508	216678502	216678530	-	1	0	0	0
hsa-miR-424-5p	ENSG00000092978	GPATCH2	protein_coding	chr1	217781783	217781788	217781783	217781788	-	0	0	0	0
hsa-miR-424-5p	ENSG00000092978	GPATCH2	protein_coding	chr1	217782634	217782639	217782634	217782639	-	0	0	0	0
hsa-miR-424-5p	ENSG00000196660	SLC30A10	protein_coding	chr1	220088575	220088581	220088574	220088595	-	1	1	0	0
hsa-miR-424-5p	ENSG00000143514	TP53BP2	protein_coding	chr1	223968188	223968193	223968188	223968193	-	1	0	0	0
hsa-miR-424-5p	ENSG00000154380	ENAH	protein_coding	chr1	225684183	225684188	225684182	225684210	-	1	0	0	0
hsa-miR-424-5p	ENSG00000154380	ENAH	protein_coding	chr1	225685273	225685279	225685272	225685300	-	1	0	1	1
hsa-miR-424-5p	ENSG00000143811	PYCR2	protein_coding	chr1	226107890	226107895	226107890	226107895	-	1	0	0	0
hsa-miR-424-5p	ENSG00000143776	CDC42BPA	protein_coding	chr1	227180161	227180167	227180161	227180167	-	1	0	0	0
hsa-miR-424-5p	ENSG00000143776	CDC42BPA	protein_coding	chr1	227180273	227180279	227180273	227180279	-	1	0	0	0
hsa-miR-424-5p	ENSG00000081692	JMJD4	protein_coding	chr1	227919459	227919465	227919458	227919479	-	1	1	0	0
hsa-miR-424-5p	ENSG00000143793	C1orf35	protein_coding	chr1	228288726	228288731	228288726	228288731	-	1	0	0	0
hsa-miR-424-5p	ENSG00000154370	TRIM11	protein_coding	chr1	228581601	228581604	228581598	228581606	-	2	0	0	0
hsa-miR-424-5p	ENSG00000154370	TRIM11	protein_coding	chr1	228581898	228581903	228581898	228581903	-	1	0	0	0
hsa-miR-424-5p	ENSG00000069248	NUP133	protein_coding	chr1	229577355	229577360	229577355	229577360	-	1	0	0	0
hsa-miR-424-5p	ENSG00000182118	FAM89A	protein_coding	chr1	231155541	231155547	231155540	231155568	-	1	1	0	0
hsa-miR-424-5p	ENSG00000135766	EGLN1	protein_coding	chr1	231501517	231501523	231501516	231501544	-	1	1	0	1
hsa-miR-424-5p	ENSG00000116991	SIPA1L2	protein_coding	chr1	232533816	232533821	232533815	232533843	-	1	1	1	1
hsa-miR-424-5p	ENSG00000059588	TARBP1	protein_coding	chr1	234527297	234527300	234527294	234527317	-	2	1	0	0
hsa-miR-424-5p	ENSG00000168264	IRF2BP2	protein_coding	chr1	234742258	234742264	234742258	234742264	-	1	0	1	0
hsa-miR-424-5p	ENSG00000168264	IRF2BP2	protein_coding	chr1	234742593	234742598	234742593	234742598	-	1	0	0	0
hsa-miR-424-5p	ENSG00000173726	TOMM20	protein_coding	chr1	235274861	235274867	235274861	235274867	-	1	0	0	1
hsa-miR-424-5p	ENSG00000116962	NID1	protein_coding	chr1	236140572	236140577	236140572	236140577	-	1	0	0	0
hsa-miR-424-5p	ENSG00000180875	GREM2	protein_coding	chr1	240655749	240655754	240655749	240655754	-	1	0	0	0
hsa-miR-424-5p	ENSG00000143702	CEP170	protein_coding	chr1	243289365	243289370	243289365	243289370	-	1	0	0	0
hsa-miR-424-5p	ENSG00000117020	AKT3	protein_coding	chr1	243665504	243665509	243665503	243665531	-	0	0	1	1
hsa-miR-424-5p	ENSG00000117020	AKT3	protein_coding	chr1	243668313	243668315	243668309	243668337	-	2	1	2	1
hsa-miR-424-5p	ENSG00000153187	HNRNPU	protein_coding	chr1	245013686	245013691	245013686	245013691	-	1	0	0	0
hsa-miR-424-5p	ENSG00000153207	AHCTF1	protein_coding	chr1	247002736	247002741	247002735	247002759	-	1	1	0	0
hsa-miR-424-5p	ENSG00000175137	SH3BP5L	protein_coding	chr1	249105596	249105602	249105596	249105602	-	1	0	0	0
hsa-miR-424-5p	ENSG00000188157	AGRN	protein_coding	chr1	990713	990718	990713	990718	+	1	0	0	0
hsa-miR-424-5p	ENSG00000176022	B3GALT6	protein_coding	chr1	1169195	1169200	1169195	1169200	+	1	0	0	0
hsa-miR-424-5p	ENSG00000176022	B3GALT6	protein_coding	chr1	1169336	1169342	1169336	1169342	+	1	0	0	0
hsa-miR-424-5p	ENSG00000197530	MIB2	protein_coding	chr1	1564878	1564906	1564878	1564906	+	0	0	0	0
hsa-miR-424-5p	ENSG00000067606	PRKCZ	protein_coding	chr1	2116663	2116670	2116663	2116670	+	1	0	0	0
hsa-miR-424-5p	ENSG00000157933	SKI	protein_coding	chr1	2238741	2238747	2238720	2238748	+	1	0	0	0
hsa-miR-424-5p	ENSG00000157933	SKI	protein_coding	chr1	2239806	2239812	2239785	2239813	+	0	0	1	0
hsa-miR-424-5p	ENSG00000157933	SKI	protein_coding	chr1	2240576	2240581	2240554	2240582	+	0	0	0	0
hsa-miR-424-5p	ENSG00000157933	SKI	protein_coding	chr1	2240690	2240695	2240668	2240696	+	0	0	0	0
hsa-miR-424-5p	ENSG00000157933	SKI	protein_coding	chr1	2241458	2241460	2241433	2241464	+	0	0	1	1
hsa-miR-424-5p	ENSG00000149527	PLCH2	protein_coding	chr1	2433598	2433626	2433598	2433626	+	0	0	0	0
hsa-miR-424-5p	ENSG00000158109	TPRG1L	protein_coding	chr1	3545282	3545285	3545258	3545289	+	2	0	0	0
hsa-miR-424-5p	ENSG00000158109	TPRG1L	protein_coding	chr1	3545425	3545431	3545404	3545432	+	1	0	0	0
hsa-miR-424-5p	ENSG00000187017	ESPN	protein_coding	chr1	6520445	6520451	6520424	6520452	+	1	1	0	0
hsa-miR-424-5p	ENSG00000171735	CAMTA1	protein_coding	chr1	6885189	6885210	6885189	6885210	+	0	1	0	0
hsa-miR-424-5p	ENSG00000049246	PER3	protein_coding	chr1	7904821	7904827	7904821	7904827	+	1	0	0	0
hsa-miR-424-5p	ENSG00000049239	H6PD	protein_coding	chr1	9330226	9330229	9330223	9330232	+	2	0	0	0
hsa-miR-424-5p	ENSG00000171621	SPSB1	protein_coding	chr1	9429148	9429153	9429148	9429153	+	1	0	0	0
hsa-miR-424-5p	ENSG00000188807	TMEM201	protein_coding	chr1	9673182	9673188	9673182	9673188	+	0	0	1	0
hsa-miR-424-5p	ENSG00000130939	UBE4B	protein_coding	chr1	10207094	10207122	10207094	10207122	+	0	0	0	0
hsa-miR-424-5p	ENSG00000130939	UBE4B	protein_coding	chr1	10240413	10240418	10240391	10240419	+	1	1	1	1
hsa-miR-424-5p	ENSG00000054523	KIF1B	protein_coding	chr1	10336383	10336411	10336383	10336411	+	0	0	0	0
hsa-miR-424-5p	ENSG00000054523	KIF1B	protein_coding	chr1	10366391	10366396	10366391	10366396	+	1	0	0	0
hsa-miR-424-5p	ENSG00000054523	KIF1B	protein_coding	chr1	10437043	10437049	10437022	10437050	+	1	0	0	0
hsa-miR-424-5p	ENSG00000054523	KIF1B	protein_coding	chr1	10440218	10440224	10440197	10440225	+	1	1	1	1
hsa-miR-424-5p	ENSG00000054523	KIF1B	protein_coding	chr1	10440790	10440793	10440766	10440797	+	2	1	1	2
hsa-miR-424-5p	ENSG00000054523	KIF1B	protein_coding	chr1	10440966	10440972	10440945	10440973	+	1	1	0	0
hsa-miR-424-5p	ENSG00000142657	PGD	protein_coding	chr1	10480016	10480021	10480016	10480021	+	1	0	0	0
hsa-miR-424-5p	ENSG00000177674	AGTRAP	protein_coding	chr1	11808589	11808597	11808569	11808617	+	0	0	0	0
hsa-miR-424-5p	ENSG00000011021	CLCN6	protein_coding	chr1	11901850	11901855	11901850	11901855	+	1	0	0	0
hsa-miR-424-5p	ENSG00000011021	CLCN6	protein_coding	chr1	11902060	11902063	11902058	11902066	+	2	0	0	0
hsa-miR-424-5p	ENSG00000116688	MFN2	protein_coding	chr1	12069759	12069781	12069759	12069781	+	0	0	0	0
hsa-miR-424-5p	ENSG00000116688	MFN2	protein_coding	chr1	12072242	12072248	12072221	12072249	+	1	0	0	0
hsa-miR-424-5p	ENSG00000116688	MFN2	protein_coding	chr1	12073406	12073412	12073385	12073413	+	1	1	0	1
hsa-miR-424-5p	ENSG00000048707	VPS13D	protein_coding	chr1	12429720	12429741	12429713	12429741	+	0	1	0	0
hsa-miR-424-5p	ENSG00000048707	VPS13D	protein_coding	chr1	12571742	12571747	12571720	12571748	+	1	0	0	0
hsa-miR-424-5p	ENSG00000048707	VPS13D	protein_coding	chr1	12571951	12571956	12571929	12571957	+	1	0	0	0
hsa-miR-424-5p	ENSG00000162493	PDPN	protein_coding	chr1	13943290	13943295	13943290	13943295	+	1	0	0	0
hsa-miR-424-5p	ENSG00000116731	PRDM2	protein_coding	chr1	14107623	14107651	14107623	14107651	+	0	0	0	0
hsa-miR-424-5p	ENSG00000116731	PRDM2	protein_coding	chr1	14109240	14109265	14109237	14109268	+	0	0	0	0
hsa-miR-424-5p	ENSG00000116731	PRDM2	protein_coding	chr1	14113195	14113201	14113174	14113202	+	1	1	0	0
hsa-miR-424-5p	ENSG00000189337	KAZN	protein_coding	chr1	15393214	15393220	15393200	15393221	+	1	1	0	0
hsa-miR-424-5p	ENSG00000142634	EFHD2	protein_coding	chr1	15756000	15756005	15756000	15756005	+	1	0	0	0
hsa-miR-424-5p	ENSG00000116138	DNAJC16	protein_coding	chr1	15895100	15895106	15895100	15895106	+	1	0	0	0
hsa-miR-424-5p	ENSG00000116138	DNAJC16	protein_coding	chr1	15895400	15895405	15895400	15895405	+	1	0	0	0
hsa-miR-424-5p	ENSG00000116138	DNAJC16	protein_coding	chr1	15895561	15895566	15895561	15895567	+	1	0	1	1
hsa-miR-424-5p	ENSG00000116138	DNAJC16	protein_coding	chr1	15896406	15896412	15896406	15896412	+	1	0	0	0
hsa-miR-424-5p	ENSG00000116138	DNAJC16	protein_coding	chr1	15897977	15897982	15897977	15897982	+	1	0	0	0
hsa-miR-424-5p	ENSG00000065526	SPEN	protein_coding	chr1	16199464	16199492	16199464	16199492	+	0	0	0	0
hsa-miR-424-5p	ENSG00000065526	SPEN	protein_coding	chr1	16259005	16259033	16259005	16259033	+	0	0	0	0
hsa-miR-424-5p	ENSG00000065526	SPEN	protein_coding	chr1	16266099	16266101	16266077	16266105	+	1	1	2	1
hsa-miR-424-5p	ENSG00000040487	PQLC2	protein_coding	chr1	19652785	19652803	19652775	19652813	+	0	0	0	0
hsa-miR-424-5p	ENSG00000040487	PQLC2	protein_coding	chr1	19653782	19653810	19653782	19653810	+	0	0	0	0
hsa-miR-424-5p	ENSG00000040487	PQLC2	protein_coding	chr1	19653872	19653894	19653866	19653897	+	0	0	0	0
hsa-miR-424-5p	ENSG00000169914	OTUD3	protein_coding	chr1	20236280	20236285	20236280	20236285	+	1	0	0	0
hsa-miR-424-5p	ENSG00000169914	OTUD3	protein_coding	chr1	20237285	20237290	20237285	20237290	+	1	0	0	0
hsa-miR-424-5p	ENSG00000169914	OTUD3	protein_coding	chr1	20238648	20238648	20238643	20238654	+	3	0	0	0
hsa-miR-424-5p	ENSG00000070831	CDC42	protein_coding	chr1	22416551	22416554	22416534	22416557	+	2	1	1	2
hsa-miR-424-5p	ENSG00000070831	CDC42	protein_coding	chr1	22416740	22416746	22416728	22416747	+	1	1	1	1
hsa-miR-424-5p	ENSG00000070831	CDC42	protein_coding	chr1	22418369	22418374	22418369	22418374	+	1	0	0	0
hsa-miR-424-5p	ENSG00000184677	ZBTB40	protein_coding	chr1	22848018	22848046	22848018	22848046	+	0	0	0	0
hsa-miR-424-5p	ENSG00000184677	ZBTB40	protein_coding	chr1	22850718	22850746	22850718	22850746	+	0	0	0	0
hsa-miR-424-5p	ENSG00000184677	ZBTB40	protein_coding	chr1	22853111	22853139	22853111	22853139	+	0	0	0	0
hsa-miR-424-5p	ENSG00000173372	C1QA	protein_coding	chr1	22965979	22965984	22965979	22965984	+	1	0	0	0
hsa-miR-424-5p	ENSG00000173369	C1QB	protein_coding	chr1	22987986	22987992	22987965	22987993	+	1	1	0	0
hsa-miR-424-5p	ENSG00000011009	LYPLA2	protein_coding	chr1	24121204	24121209	24121182	24121210	+	0	0	0	0
hsa-miR-424-5p	ENSG00000011009	LYPLA2	protein_coding	chr1	24121430	24121435	24121408	24121436	+	1	0	0	0
hsa-miR-424-5p	ENSG00000011009	LYPLA2	protein_coding	chr1	24121660	24121665	24121638	24121666	+	1	0	0	0
hsa-miR-424-5p	ENSG00000011009	LYPLA2	protein_coding	chr1	24121704	24121710	24121683	24121711	+	1	0	1	0
hsa-miR-424-5p	ENSG00000189266	PNRC2	protein_coding	chr1	24289406	24289411	24289392	24289412	+	1	1	0	1
hsa-miR-424-5p	ENSG00000133226	SRRM1	protein_coding	chr1	24975421	24975445	24975421	24975445	+	0	1	0	0
hsa-miR-424-5p	ENSG00000204178	MACO1	protein_coding	chr1	25775368	25775389	25775361	25775389	+	0	1	0	0
hsa-miR-424-5p	ENSG00000204178	MACO1	protein_coding	chr1	25780841	25780869	25780841	25780869	+	0	0	0	0
hsa-miR-424-5p	ENSG00000157978	LDLRAP1	protein_coding	chr1	25894240	25894245	25894240	25894245	+	1	0	0	0
hsa-miR-424-5p	ENSG00000157978	LDLRAP1	protein_coding	chr1	25894524	25894529	25894524	25894529	+	1	0	0	0
hsa-miR-424-5p	ENSG00000162430	SELENON	protein_coding	chr1	26142466	26142471	26142466	26142471	+	1	0	0	0
hsa-miR-424-5p	ENSG00000162430	SELENON	protein_coding	chr1	26144494	26144500	26144494	26144500	+	1	0	0	0
hsa-miR-424-5p	ENSG00000117640	MTFR1L	protein_coding	chr1	26158988	26158994	26158967	26158995	+	1	1	1	1
hsa-miR-424-5p	ENSG00000117640	MTFR1L	protein_coding	chr1	26159063	26159068	26159041	26159069	+	1	0	0	0
hsa-miR-424-5p	ENSG00000175087	PDIK1L	protein_coding	chr1	26449100	26449106	26449079	26449107	+	1	1	1	1
hsa-miR-424-5p	ENSG00000175087	PDIK1L	protein_coding	chr1	26449766	26449771	26449744	26449772	+	1	0	0	0
hsa-miR-424-5p	ENSG00000130695	CEP85	protein_coding	chr1	26584096	26584124	26584096	26584124	+	0	0	0	0
hsa-miR-424-5p	ENSG00000130695	CEP85	protein_coding	chr1	26604611	26604616	26604589	26604617	+	1	0	0	0
hsa-miR-424-5p	ENSG00000130695	CEP85	protein_coding	chr1	26605122	26605128	26605101	26605129	+	1	1	0	0
hsa-miR-424-5p	ENSG00000117682	DHDDS	protein_coding	chr1	26796133	26796139	26796116	26796140	+	1	1	1	1
hsa-miR-424-5p	ENSG00000117713	ARID1A	protein_coding	chr1	27105959	27105987	27105959	27105987	+	0	0	0	0
hsa-miR-424-5p	ENSG00000117713	ARID1A	protein_coding	chr1	27106388	27106413	27106385	27106416	+	0	0	0	0
hsa-miR-424-5p	ENSG00000117713	ARID1A	protein_coding	chr1	27107078	27107106	27107078	27107106	+	0	0	0	0
hsa-miR-424-5p	ENSG00000204160	ZDHHC18	protein_coding	chr1	27180779	27180784	27180779	27180784	+	1	0	0	0
hsa-miR-424-5p	ENSG00000142784	WDTC1	protein_coding	chr1	27632756	27632775	27632747	27632775	+	0	1	0	0
hsa-miR-424-5p	ENSG00000142784	WDTC1	protein_coding	chr1	27633807	27633813	27633786	27633814	+	1	0	1	1
hsa-miR-424-5p	ENSG00000181773	GPR3	protein_coding	chr1	27720793	27720812	27720793	27720812	+	0	0	0	0
hsa-miR-424-5p	ENSG00000130775	THEMIS2	protein_coding	chr1	28212460	28212466	28212446	28212467	+	1	1	0	0
hsa-miR-424-5p	ENSG00000158156	XKR8	protein_coding	chr1	28293128	28293153	28293125	28293156	+	0	0	0	0
hsa-miR-424-5p	ENSG00000158156	XKR8	protein_coding	chr1	28293221	28293249	28293221	28293249	+	0	0	0	0
hsa-miR-424-5p	ENSG00000158156	XKR8	protein_coding	chr1	28293535	28293563	28293535	28293563	+	0	0	0	0
hsa-miR-424-5p	ENSG00000158156	XKR8	protein_coding	chr1	28294403	28294408	28294381	28294409	+	1	0	0	0
hsa-miR-424-5p	ENSG00000130766	SESN2	protein_coding	chr1	28608710	28608713	28608707	28608716	+	2	0	0	2
hsa-miR-424-5p	ENSG00000204138	PHACTR4	protein_coding	chr1	28793140	28793168	28793140	28793168	+	0	0	0	0
hsa-miR-424-5p	ENSG00000204138	PHACTR4	protein_coding	chr1	28800151	28800179	28800151	28800179	+	0	0	0	0
hsa-miR-424-5p	ENSG00000204138	PHACTR4	protein_coding	chr1	28823091	28823096	28823077	28823105	+	1	1	0	0
hsa-miR-424-5p	ENSG00000204138	PHACTR4	protein_coding	chr1	28823098	28823104	28823097	28823104	+	1	0	0	1
hsa-miR-424-5p	ENSG00000168528	SERINC2	protein_coding	chr1	31898664	31898684	31898664	31898684	+	0	0	0	0
hsa-miR-424-5p	ENSG00000121775	TMEM39B	protein_coding	chr1	32568168	32568196	32568168	32568196	+	0	0	0	0
hsa-miR-424-5p	ENSG00000025800	KPNA6	protein_coding	chr1	32639014	32639017	32639012	32639020	+	2	0	1	0
hsa-miR-424-5p	ENSG00000025800	KPNA6	protein_coding	chr1	32639916	32639921	32639916	32639921	+	1	0	0	0
hsa-miR-424-5p	ENSG00000025800	KPNA6	protein_coding	chr1	32640623	32640628	32640623	32640628	+	1	0	0	0
hsa-miR-424-5p	ENSG00000084652	TXLNA	protein_coding	chr1	32661265	32661270	32661265	32661270	+	1	0	0	0
hsa-miR-424-5p	ENSG00000084652	TXLNA	protein_coding	chr1	32662921	32662926	32662921	32662926	+	1	0	0	0
hsa-miR-424-5p	ENSG00000084652	TXLNA	protein_coding	chr1	32663124	32663129	32663124	32663129	+	1	0	0	0
hsa-miR-424-5p	ENSG00000162522	KIAA1522	protein_coding	chr1	33240033	33240039	33240033	33240039	+	1	0	0	0
hsa-miR-424-5p	ENSG00000160094	ZNF362	protein_coding	chr1	33765014	33765016	33764992	33765020	+	1	1	2	1
hsa-miR-424-5p	ENSG00000134698	AGO4	protein_coding	chr1	36320012	36320033	36320005	36320033	+	0	1	0	0
hsa-miR-424-5p	ENSG00000134698	AGO4	protein_coding	chr1	36322606	36322612	36322585	36322613	+	0	0	1	0
hsa-miR-424-5p	ENSG00000092847	AGO1	protein_coding	chr1	36386233	36386238	36386211	36386239	+	1	0	0	0
hsa-miR-424-5p	ENSG00000092847	AGO1	protein_coding	chr1	36386805	36386811	36386784	36386812	+	1	1	1	1
hsa-miR-424-5p	ENSG00000092847	AGO1	protein_coding	chr1	36389332	36389360	36389332	36389360	+	0	0	0	0
hsa-miR-424-5p	ENSG00000092847	AGO1	protein_coding	chr1	36394637	36394643	36394616	36394644	+	0	0	0	0
hsa-miR-424-5p	ENSG00000092847	AGO1	protein_coding	chr1	36395152	36395158	36395131	36395159	+	0	0	0	1
hsa-miR-424-5p	ENSG00000126070	AGO3	protein_coding	chr1	36525301	36525307	36525301	36525307	+	0	0	0	1
hsa-miR-424-5p	ENSG00000126070	AGO3	protein_coding	chr1	36536784	36536791	36536784	36536791	+	0	0	0	1
hsa-miR-424-5p	ENSG00000054118	THRAP3	protein_coding	chr1	36770814	36770820	36770799	36770821	+	0	1	0	0
hsa-miR-424-5p	ENSG00000214193	SH3D21	protein_coding	chr1	36789604	36789610	36789604	36789610	+	1	0	0	0
hsa-miR-424-5p	ENSG00000174574	AKIRIN1	protein_coding	chr1	39469772	39469777	39469750	39469778	+	1	1	1	0
hsa-miR-424-5p	ENSG00000174574	AKIRIN1	protein_coding	chr1	39471619	39471624	39471597	39471625	+	0	0	1	1
hsa-miR-424-5p	ENSG00000127603	MACF1	protein_coding	chr1	39952106	39952111	39952106	39952112	+	1	0	1	0
hsa-miR-424-5p	ENSG00000084072	PPIE	protein_coding	chr1	40219296	40219303	40219283	40219304	+	1	1	0	0
hsa-miR-424-5p	ENSG00000168389	MFSD2A	protein_coding	chr1	40434331	40434352	40434331	40434352	+	0	1	0	0
hsa-miR-424-5p	ENSG00000131236	CAP1	protein_coding	chr1	40537819	40537824	40537819	40537824	+	1	0	0	0
hsa-miR-424-5p	ENSG00000084070	SMAP2	protein_coding	chr1	40888395	40888401	40888381	40888402	+	1	1	0	0
hsa-miR-424-5p	ENSG00000066136	NFYC	protein_coding	chr1	41236983	41236988	41236983	41236988	+	1	0	0	0
hsa-miR-424-5p	ENSG00000171960	PPIH	protein_coding	chr1	43142326	43142332	43142312	43142333	+	1	1	0	0
hsa-miR-424-5p	ENSG00000164011	ZNF691	protein_coding	chr1	43317560	43317566	43317546	43317567	+	1	1	0	0
hsa-miR-424-5p	ENSG00000142949	PTPRF	protein_coding	chr1	44088653	44088658	44088653	44088658	+	1	0	0	0
hsa-miR-424-5p	ENSG00000126091	ST3GAL3	protein_coding	chr1	44201947	44201969	44201947	44201969	+	0	1	0	0
hsa-miR-424-5p	ENSG00000284989	AL451062.3	protein_coding	chr1	44201947	44201969	44201947	44201969	+	0	1	0	0
hsa-miR-424-5p	ENSG00000132768	DPH2	protein_coding	chr1	44436805	44436833	44436805	44436833	+	0	0	0	0
hsa-miR-424-5p	ENSG00000132768	DPH2	protein_coding	chr1	44437477	44437505	44437477	44437505	+	0	0	0	0
hsa-miR-424-5p	ENSG00000132768	DPH2	protein_coding	chr1	44438251	44438256	44438251	44438256	+	1	0	0	0
hsa-miR-424-5p	ENSG00000117410	ATP6V0B	protein_coding	chr1	44443868	44443868	44443841	44443875	+	3	0	0	0
hsa-miR-424-5p	ENSG00000117411	B4GALT2	protein_coding	chr1	44456189	44456194	44456189	44456194	+	1	0	0	0
hsa-miR-424-5p	ENSG00000178028	DMAP1	protein_coding	chr1	44686332	44686337	44686332	44686337	+	1	0	0	0
hsa-miR-424-5p	ENSG00000142945	KIF2C	protein_coding	chr1	45233170	45233175	45233170	45233175	+	1	0	0	0
hsa-miR-424-5p	ENSG00000173846	PLK3	protein_coding	chr1	45268457	45268477	45268457	45268477	+	0	1	0	0
hsa-miR-424-5p	ENSG00000173846	PLK3	protein_coding	chr1	45270973	45270994	45270973	45270994	+	0	1	0	0
hsa-miR-424-5p	ENSG00000132773	TOE1	protein_coding	chr1	45808240	45808263	45808240	45808263	+	0	1	0	0
hsa-miR-424-5p	ENSG00000132763	MMACHC	protein_coding	chr1	45974515	45974536	45974515	45974536	+	0	1	0	0
hsa-miR-424-5p	ENSG00000132763	MMACHC	protein_coding	chr1	45975879	45975885	45975865	45975886	+	1	1	0	0
hsa-miR-424-5p	ENSG00000117481	NSUN4	protein_coding	chr1	46828179	46828184	46828179	46828184	+	1	0	0	0
hsa-miR-424-5p	ENSG00000162365	CYP4A22	protein_coding	chr1	47603222	47603250	47603222	47603250	+	0	0	0	0
hsa-miR-424-5p	ENSG00000162368	CMPK1	protein_coding	chr1	47842468	47842473	47842468	47842474	+	1	0	1	1
hsa-miR-424-5p	ENSG00000186564	FOXD2	protein_coding	chr1	47906201	47906206	47906201	47906206	+	1	0	0	0
hsa-miR-424-5p	ENSG00000134717	BTF3L4	protein_coding	chr1	52553594	52553599	52553594	52553599	+	1	0	0	0
hsa-miR-424-5p	ENSG00000134748	PRPF38A	protein_coding	chr1	52882893	52882898	52882871	52882899	+	1	0	0	0
hsa-miR-424-5p	ENSG00000162378	ZYG11B	protein_coding	chr1	53250671	53250692	53250671	53250692	+	0	1	0	0
hsa-miR-424-5p	ENSG00000116221	MRPL37	protein_coding	chr1	54684014	54684020	54684014	54684020	+	1	0	0	0
hsa-miR-424-5p	ENSG00000169174	PCSK9	protein_coding	chr1	55529391	55529396	55529391	55529396	+	1	0	0	0
hsa-miR-424-5p	ENSG00000162409	PRKAA2	protein_coding	chr1	57177614	57177619	57177614	57177619	+	1	0	0	0
hsa-miR-424-5p	ENSG00000134709	HOOK1	protein_coding	chr1	60324670	60324695	60324670	60324695	+	0	1	0	0
hsa-miR-424-5p	ENSG00000079739	PGM1	protein_coding	chr1	64125573	64125594	64125573	64125594	+	0	1	0	0
hsa-miR-424-5p	ENSG00000162433	AK4	protein_coding	chr1	65692902	65692907	65692880	65692908	+	1	1	1	1
hsa-miR-424-5p	ENSG00000162433	AK4	protein_coding	chr1	65694580	65694585	65694558	65694586	+	0	0	0	0
hsa-miR-424-5p	ENSG00000162433	AK4	protein_coding	chr1	65694787	65694793	65694766	65694794	+	0	0	0	0
hsa-miR-424-5p	ENSG00000116754	SRSF11	protein_coding	chr1	70700397	70700402	70700397	70700402	+	0	0	0	0
hsa-miR-424-5p	ENSG00000116754	SRSF11	protein_coding	chr1	70703219	70703225	70703219	70703226	+	0	0	0	1
hsa-miR-424-5p	ENSG00000116754	SRSF11	protein_coding	chr1	70716733	70716736	70716719	70716740	+	1	1	2	1
hsa-miR-424-5p	ENSG00000162623	TYW3	protein_coding	chr1	75229849	75229854	75229849	75229854	+	1	0	0	0
hsa-miR-424-5p	ENSG00000162623	TYW3	protein_coding	chr1	75231529	75231534	75231529	75231534	+	0	0	0	0
hsa-miR-424-5p	ENSG00000180488	MIGA1	protein_coding	chr1	78326981	78327002	78326974	78327002	+	0	1	0	0
hsa-miR-424-5p	ENSG00000180488	MIGA1	protein_coding	chr1	78343423	78343429	78343402	78343430	+	1	1	0	1
hsa-miR-424-5p	ENSG00000180488	MIGA1	protein_coding	chr1	78343609	78343614	78343587	78343615	+	1	0	0	0
hsa-miR-424-5p	ENSG00000162616	DNAJB4	protein_coding	chr1	78482397	78482403	78482376	78482404	+	1	1	0	1
hsa-miR-424-5p	ENSG00000162616	DNAJB4	protein_coding	chr1	78482880	78482886	78482859	78482887	+	1	1	0	1
hsa-miR-424-5p	ENSG00000162616	DNAJB4	protein_coding	chr1	78483637	78483643	78483616	78483644	+	0	0	0	0
hsa-miR-424-5p	ENSG00000117114	ADGRL2	protein_coding	chr1	82457087	82457093	82457066	82457094	+	1	1	1	1
hsa-miR-424-5p	ENSG00000153936	HS2ST1	protein_coding	chr1	87571987	87571992	87571987	87571992	+	1	0	0	0
hsa-miR-424-5p	ENSG00000065243	PKN2	protein_coding	chr1	89299786	89299791	89299786	89299791	+	1	0	0	0
hsa-miR-424-5p	ENSG00000171488	LRRC8C	protein_coding	chr1	90182363	90182369	90182363	90182369	+	0	0	0	0
hsa-miR-424-5p	ENSG00000171488	LRRC8C	protein_coding	chr1	90183481	90183486	90183481	90183486	+	0	0	0	0
hsa-miR-424-5p	ENSG00000162664	ZNF326	protein_coding	chr1	90475703	90475731	90475703	90475731	+	0	0	0	0
hsa-miR-424-5p	ENSG00000162664	ZNF326	protein_coding	chr1	90493585	90493591	90493564	90493592	+	1	1	1	0
hsa-miR-424-5p	ENSG00000097046	CDC7	protein_coding	chr1	91990860	91990865	91990860	91990865	+	1	0	0	0
hsa-miR-424-5p	ENSG00000122406	RPL5	protein_coding	chr1	93306123	93306141	93306123	93306141	+	0	1	0	0
hsa-miR-424-5p	ENSG00000122483	CCDC18	protein_coding	chr1	93744242	93744248	93744227	93744249	+	1	1	0	0
hsa-miR-424-5p	ENSG00000137942	FNBP1L	protein_coding	chr1	94018022	94018027	94018022	94018027	+	1	0	0	0
hsa-miR-424-5p	ENSG00000137942	FNBP1L	protein_coding	chr1	94018826	94018831	94018826	94018831	+	1	0	0	0
hsa-miR-424-5p	ENSG00000143036	SLC44A3	protein_coding	chr1	95310976	95311004	95310976	95311004	+	0	0	0	0
hsa-miR-424-5p	ENSG00000117569	PTBP2	protein_coding	chr1	97270379	97270400	97270379	97270400	+	0	1	0	0
hsa-miR-424-5p	ENSG00000117600	PLPPR4	protein_coding	chr1	99773131	99773136	99773131	99773136	+	1	0	0	0
hsa-miR-424-5p	ENSG00000079335	CDC14A	protein_coding	chr1	100984812	100984818	100984791	100984819	+	1	1	0	1
hsa-miR-424-5p	ENSG00000079335	CDC14A	protein_coding	chr1	100985036	100985041	100985014	100985042	+	1	0	0	0
hsa-miR-424-5p	ENSG00000162695	SLC30A7	protein_coding	chr1	101440828	101440833	101440828	101440833	+	1	0	0	0
hsa-miR-424-5p	ENSG00000162695	SLC30A7	protein_coding	chr1	101445688	101445693	101445688	101445693	+	0	0	0	0
hsa-miR-424-5p	ENSG00000162695	SLC30A7	protein_coding	chr1	101446247	101446252	101446247	101446252	+	0	0	0	0
hsa-miR-424-5p	ENSG00000162636	FAM102B	protein_coding	chr1	109178709	109178714	109178695	109178715	+	1	0	0	0
hsa-miR-424-5p	ENSG00000162636	FAM102B	protein_coding	chr1	109180446	109180451	109180446	109180451	+	1	0	0	0
hsa-miR-424-5p	ENSG00000162636	FAM102B	protein_coding	chr1	109180551	109180556	109180551	109180556	+	1	0	0	0
hsa-miR-424-5p	ENSG00000116266	STXBP3	protein_coding	chr1	109351685	109351688	109351661	109351691	+	2	1	1	2
hsa-miR-424-5p	ENSG00000215717	TMEM167B	protein_coding	chr1	109637052	109637071	109637052	109637071	+	0	1	0	0
hsa-miR-424-5p	ENSG00000215717	TMEM167B	protein_coding	chr1	109638697	109638702	109638697	109638702	+	0	0	0	0
hsa-miR-424-5p	ENSG00000215717	TMEM167B	protein_coding	chr1	109639078	109639083	109639078	109639083	+	0	0	0	0
hsa-miR-424-5p	ENSG00000116299	KIAA1324	protein_coding	chr1	109707263	109707291	109707263	109707291	+	0	0	0	0
hsa-miR-424-5p	ENSG00000116299	KIAA1324	protein_coding	chr1	109741268	109741291	109741263	109741291	+	0	1	0	0
hsa-miR-424-5p	ENSG00000116299	KIAA1324	protein_coding	chr1	109742512	109742540	109742512	109742540	+	0	0	0	0
hsa-miR-424-5p	ENSG00000143126	CELSR2	protein_coding	chr1	109792748	109792758	109792730	109792776	+	0	0	0	0
hsa-miR-424-5p	ENSG00000143126	CELSR2	protein_coding	chr1	109808779	109808804	109808776	109808807	+	0	0	0	0
hsa-miR-424-5p	ENSG00000143126	CELSR2	protein_coding	chr1	109814019	109814047	109814019	109814047	+	0	0	0	0
hsa-miR-424-5p	ENSG00000143028	SYPL2	protein_coding	chr1	110024521	110024526	110024521	110024526	+	1	0	0	0
hsa-miR-424-5p	ENSG00000174151	CYB561D1	protein_coding	chr1	110038996	110039024	110038996	110039024	+	0	0	0	0
hsa-miR-424-5p	ENSG00000174151	CYB561D1	protein_coding	chr1	110039709	110039714	110039687	110039715	+	1	0	0	0
hsa-miR-424-5p	ENSG00000174151	CYB561D1	protein_coding	chr1	110040238	110040266	110040238	110040266	+	0	0	0	0
hsa-miR-424-5p	ENSG00000174151	CYB561D1	protein_coding	chr1	110042516	110042522	110042495	110042523	+	0	1	0	0
hsa-miR-424-5p	ENSG00000065135	GNAI3	protein_coding	chr1	110091428	110091456	110091428	110091456	+	0	0	0	0
hsa-miR-424-5p	ENSG00000065135	GNAI3	protein_coding	chr1	110135797	110135802	110135775	110135803	+	1	1	1	1
hsa-miR-424-5p	ENSG00000184371	CSF1	protein_coding	chr1	110473035	110473041	110473014	110473042	+	0	0	1	1
hsa-miR-424-5p	ENSG00000168710	AHCYL1	protein_coding	chr1	110564687	110564692	110564665	110564693	+	1	0	0	0
hsa-miR-424-5p	ENSG00000116396	KCNC4	protein_coding	chr1	110766031	110766059	110766031	110766059	+	0	0	0	0
hsa-miR-424-5p	ENSG00000116396	KCNC4	protein_coding	chr1	110776305	110776311	110776284	110776312	+	1	1	1	1
hsa-miR-424-5p	ENSG00000116396	KCNC4	protein_coding	chr1	110776648	110776654	110776627	110776661	+	1	0	1	0
hsa-miR-424-5p	ENSG00000162775	RBM15	protein_coding	chr1	110889255	110889260	110889240	110889261	+	1	1	0	0
hsa-miR-424-5p	ENSG00000116473	RAP1A	protein_coding	chr1	112251834	112251854	112251834	112251854	+	0	1	0	0
hsa-miR-424-5p	ENSG00000134245	WNT2B	protein_coding	chr1	113063227	113063232	113063227	113063233	+	1	0	1	1
hsa-miR-424-5p	ENSG00000155363	MOV10	protein_coding	chr1	113235415	113235443	113235415	113235443	+	0	0	0	0
hsa-miR-424-5p	ENSG00000155363	MOV10	protein_coding	chr1	113243296	113243301	113243274	113243302	+	1	0	1	0
hsa-miR-424-5p	ENSG00000198799	LRIG2	protein_coding	chr1	113667037	113667043	113667016	113667044	+	1	1	1	1
hsa-miR-424-5p	ENSG00000173218	VANGL1	protein_coding	chr1	116235063	116235069	116235063	116235069	+	1	0	0	0
hsa-miR-424-5p	ENSG00000134247	PTGFRN	protein_coding	chr1	117530032	117530037	117530032	117530037	+	1	0	0	0
hsa-miR-424-5p	ENSG00000134247	PTGFRN	protein_coding	chr1	117530990	117530993	117530987	117530996	+	2	0	0	0
hsa-miR-424-5p	ENSG00000183508	FAM46C	protein_coding	chr1	118169491	118169497	118169491	118169497	+	1	0	0	0
hsa-miR-424-5p	ENSG00000265972	TXNIP	protein_coding	chr1	145441817	145441822	145441795	145441823	+	1	0	0	0
hsa-miR-424-5p	ENSG00000265972	TXNIP	protein_coding	chr1	145442191	145442197	145442170	145442198	+	1	1	0	1
hsa-miR-424-5p	ENSG00000272031	ANKRD34A	protein_coding	chr1	145475414	145475420	145475393	145475421	+	1	1	0	1
hsa-miR-424-5p	ENSG00000272031	ANKRD34A	protein_coding	chr1	145475536	145475541	145475514	145475542	+	1	0	0	0
hsa-miR-424-5p	ENSG00000271601	LIX1L	protein_coding	chr1	145499712	145499718	145499712	145499718	+	0	0	0	1
hsa-miR-424-5p	ENSG00000196644	GPR89C	protein_coding	chr1	145923245	145923266	145923245	145923266	+	0	1	0	0
hsa-miR-424-5p	ENSG00000116128	BCL9	protein_coding	chr1	147096761	147096767	147096761	147096767	+	0	1	0	0
hsa-miR-424-5p	ENSG00000116128	BCL9	protein_coding	chr1	147096816	147096821	147096816	147096821	+	1	0	0	0
hsa-miR-424-5p	ENSG00000116128	BCL9	protein_coding	chr1	147096882	147096887	147096882	147096887	+	1	0	0	0
hsa-miR-424-5p	ENSG00000163125	RPRD2	protein_coding	chr1	150447838	150447844	150447818	150447845	+	0	1	0	1
hsa-miR-424-5p	ENSG00000143374	TARS2	protein_coding	chr1	150463912	150463934	150463912	150463934	+	0	1	0	0
hsa-miR-424-5p	ENSG00000143363	PRUNE1	protein_coding	chr1	151006868	151006873	151006868	151006873	+	1	0	0	0
hsa-miR-424-5p	ENSG00000143398	PIP5K1A	protein_coding	chr1	151220474	151220479	151220474	151220479	+	1	0	0	0
hsa-miR-424-5p	ENSG00000143375	CGN	protein_coding	chr1	151509874	151509880	151509860	151509881	+	1	1	0	0
hsa-miR-424-5p	ENSG00000143367	TUFT1	protein_coding	chr1	151554209	151554215	151554208	151554215	+	1	0	0	0
hsa-miR-424-5p	ENSG00000169469	SPRR1B	protein_coding	chr1	153005288	153005293	153005288	153005293	+	1	0	0	0
hsa-miR-424-5p	ENSG00000160679	CHTOP	protein_coding	chr1	153614963	153614968	153614941	153614969	+	0	0	0	0
hsa-miR-424-5p	ENSG00000160679	CHTOP	protein_coding	chr1	153616492	153616498	153616471	153616499	+	0	1	0	0
hsa-miR-424-5p	ENSG00000160685	ZBTB7B	protein_coding	chr1	154989431	154989436	154989431	154989436	+	1	0	0	0
hsa-miR-424-5p	ENSG00000143590	EFNA3	protein_coding	chr1	155059470	155059476	155059456	155059477	+	1	1	0	0
hsa-miR-424-5p	ENSG00000160785	SLC25A44	protein_coding	chr1	156180624	156180629	156180624	156180629	+	1	0	0	0
hsa-miR-424-5p	ENSG00000163472	TMEM79	protein_coding	chr1	156261981	156261984	156261968	156261988	+	2	1	0	0
hsa-miR-424-5p	ENSG00000143294	PRCC	protein_coding	chr1	156770330	156770335	156770330	156770335	+	1	0	0	0
hsa-miR-424-5p	ENSG00000198400	NTRK1	protein_coding	chr1	156838333	156838361	156838333	156838361	+	0	0	0	0
hsa-miR-424-5p	ENSG00000162734	PEA15	protein_coding	chr1	160184668	160184673	160184668	160184673	+	1	0	0	0
hsa-miR-424-5p	ENSG00000171786	NHLH1	protein_coding	chr1	160341985	160341991	160341971	160341992	+	1	1	0	0
hsa-miR-424-5p	ENSG00000162738	VANGL2	protein_coding	chr1	160397583	160397611	160397583	160397611	+	0	0	0	0
hsa-miR-424-5p	ENSG00000026751	SLAMF7	protein_coding	chr1	160724365	160724370	160724365	160724370	+	1	0	0	0
hsa-miR-424-5p	ENSG00000122224	LY9	protein_coding	chr1	160772353	160772359	160772332	160772360	+	1	1	0	0
hsa-miR-424-5p	ENSG00000143222	UFC1	protein_coding	chr1	161128631	161128636	161128631	161128636	+	1	0	0	0
hsa-miR-424-5p	ENSG00000143252	SDHC	protein_coding	chr1	161332800	161332805	161332800	161332805	+	1	0	0	0
hsa-miR-424-5p	ENSG00000143252	SDHC	protein_coding	chr1	161333469	161333476	161333453	161333477	+	1	1	0	0
hsa-miR-424-5p	ENSG00000118217	ATF6	protein_coding	chr1	161928511	161928517	161928490	161928518	+	1	1	0	0
hsa-miR-424-5p	ENSG00000118217	ATF6	protein_coding	chr1	161928590	161928595	161928568	161928596	+	1	0	0	0
hsa-miR-424-5p	ENSG00000118217	ATF6	protein_coding	chr1	161932713	161932719	161932692	161932720	+	0	0	0	1
hsa-miR-424-5p	ENSG00000198929	NOS1AP	protein_coding	chr1	162337553	162337558	162337553	162337558	+	1	0	0	0
hsa-miR-424-5p	ENSG00000198929	NOS1AP	protein_coding	chr1	162337990	162337996	162337990	162337996	+	1	0	0	0
hsa-miR-424-5p	ENSG00000239887	C1orf226	protein_coding	chr1	162353514	162353520	162353514	162353520	+	1	0	0	0
hsa-miR-424-5p	ENSG00000239887	C1orf226	protein_coding	chr1	162355904	162355907	162355901	162355910	+	2	0	0	0
hsa-miR-424-5p	ENSG00000152332	UHMK1	protein_coding	chr1	162493707	162493713	162493686	162493714	+	1	1	0	0
hsa-miR-424-5p	ENSG00000152332	UHMK1	protein_coding	chr1	162494495	162494500	162494473	162494501	+	0	0	1	1
hsa-miR-424-5p	ENSG00000152332	UHMK1	protein_coding	chr1	162495572	162495577	162495572	162495577	+	0	0	0	0
hsa-miR-424-5p	ENSG00000152332	UHMK1	protein_coding	chr1	162495664	162495669	162495642	162495670	+	0	0	0	0
hsa-miR-424-5p	ENSG00000143190	POU2F1	protein_coding	chr1	167339412	167339434	167339406	167339434	+	0	1	0	0
hsa-miR-424-5p	ENSG00000143190	POU2F1	protein_coding	chr1	167343431	167343459	167343431	167343459	+	0	0	0	0
hsa-miR-424-5p	ENSG00000143190	POU2F1	protein_coding	chr1	167381414	167381435	167381414	167381435	+	0	0	0	0
hsa-miR-424-5p	ENSG00000143190	POU2F1	protein_coding	chr1	167386033	167386039	167386012	167386040	+	0	0	0	0
hsa-miR-424-5p	ENSG00000143190	POU2F1	protein_coding	chr1	167387346	167387351	167387324	167387352	+	0	0	1	0
hsa-miR-424-5p	ENSG00000143190	POU2F1	protein_coding	chr1	167387455	167387461	167387434	167387462	+	0	0	1	1
hsa-miR-424-5p	ENSG00000143190	POU2F1	protein_coding	chr1	167393915	167393920	167393893	167393921	+	0	0	0	0
hsa-miR-424-5p	ENSG00000143190	POU2F1	protein_coding	chr1	167394433	167394438	167394411	167394439	+	0	0	1	1
hsa-miR-424-5p	ENSG00000143190	POU2F1	protein_coding	chr1	167394939	167394944	167394922	167394950	+	0	0	0	0
hsa-miR-424-5p	ENSG00000197965	MPZL1	protein_coding	chr1	167758676	167758679	167758674	167758682	+	2	0	0	0
hsa-miR-424-5p	ENSG00000143153	ATP1B1	protein_coding	chr1	169080666	169080687	169080666	169080687	+	0	1	0	0
hsa-miR-424-5p	ENSG00000117523	PRRC2C	protein_coding	chr1	171509122	171509150	171509122	171509150	+	0	0	0	0
hsa-miR-424-5p	ENSG00000117523	PRRC2C	protein_coding	chr1	171561148	171561153	171561126	171561154	+	1	0	0	0
hsa-miR-424-5p	ENSG00000117523	PRRC2C	protein_coding	chr1	171562349	171562352	171562328	171562356	+	2	1	0	1
hsa-miR-424-5p	ENSG00000010165	METTL13	protein_coding	chr1	171766407	171766413	171766392	171766414	+	1	1	0	0
hsa-miR-424-5p	ENSG00000094975	SUCO	protein_coding	chr1	172554162	172554190	172554162	172554190	+	0	0	0	0
hsa-miR-424-5p	ENSG00000094975	SUCO	protein_coding	chr1	172580721	172580727	172580700	172580728	+	1	1	1	1
hsa-miR-424-5p	ENSG00000185278	ZBTB37	protein_coding	chr1	173857467	173857473	173857467	173857473	+	0	0	0	1
hsa-miR-424-5p	ENSG00000116183	PAPPA2	protein_coding	chr1	176709182	176709210	176709182	176709210	+	0	0	0	0
hsa-miR-424-5p	ENSG00000186283	TOR3A	protein_coding	chr1	179064918	179064923	179064918	179064923	+	1	0	0	0
hsa-miR-424-5p	ENSG00000135837	CEP350	protein_coding	chr1	180081080	180081085	180081080	180081085	+	1	0	0	0
hsa-miR-424-5p	ENSG00000135837	CEP350	protein_coding	chr1	180081624	180081629	180081624	180081630	+	1	0	1	0
hsa-miR-424-5p	ENSG00000135837	CEP350	protein_coding	chr1	180082374	180082379	180082360	180082380	+	1	1	1	0
hsa-miR-424-5p	ENSG00000116260	QSOX1	protein_coding	chr1	180124071	180124090	180124062	180124099	+	0	0	0	0
hsa-miR-424-5p	ENSG00000116260	QSOX1	protein_coding	chr1	180166598	180166603	180166576	180166604	+	1	0	0	0
hsa-miR-424-5p	ENSG00000116260	QSOX1	protein_coding	chr1	180166905	180166910	180166905	180166910	+	1	0	0	0
hsa-miR-424-5p	ENSG00000116260	QSOX1	protein_coding	chr1	180168800	180168806	180168779	180168807	+	0	0	0	0
hsa-miR-424-5p	ENSG00000116260	QSOX1	protein_coding	chr1	180168992	180168997	180168970	180168998	+	0	0	0	0
hsa-miR-424-5p	ENSG00000121454	LHX4	protein_coding	chr1	180247419	180247425	180247398	180247426	+	0	0	0	1
hsa-miR-424-5p	ENSG00000143324	XPR1	protein_coding	chr1	180854037	180854040	180854033	180854043	+	2	0	0	2
hsa-miR-424-5p	ENSG00000143324	XPR1	protein_coding	chr1	180856771	180856776	180856771	180856776	+	0	0	0	0
hsa-miR-424-5p	ENSG00000135838	NPL	protein_coding	chr1	182798547	182798552	182798547	182798552	+	1	0	0	0
hsa-miR-424-5p	ENSG00000135862	LAMC1	protein_coding	chr1	183112028	183112034	183112007	183112035	+	1	1	1	1
hsa-miR-424-5p	ENSG00000135862	LAMC1	protein_coding	chr1	183114076	183114082	183114055	183114083	+	1	0	0	0
hsa-miR-424-5p	ENSG00000135862	LAMC1	protein_coding	chr1	183114492	183114497	183114470	183114498	+	1	0	0	0
hsa-miR-424-5p	ENSG00000143344	RGL1	protein_coding	chr1	183897559	183897564	183897559	183897564	+	1	0	0	0
hsa-miR-424-5p	ENSG00000198860	TSEN15	protein_coding	chr1	184042268	184042274	184042255	184042275	+	1	1	0	0
hsa-miR-424-5p	ENSG00000116667	C1orf21	protein_coding	chr1	184588911	184588913	184588889	184588917	+	2	1	2	1
hsa-miR-424-5p	ENSG00000116690	PRG4	protein_coding	chr1	186266027	186266049	186266027	186266049	+	0	1	0	0
hsa-miR-424-5p	ENSG00000116741	RGS2	protein_coding	chr1	192779527	192779551	192779527	192779551	+	0	0	0	0
hsa-miR-424-5p	ENSG00000118200	CAMSAP2	protein_coding	chr1	200827861	200827866	200827861	200827867	+	1	0	1	0
hsa-miR-424-5p	ENSG00000081277	PKP1	protein_coding	chr1	201299647	201299652	201299647	201299652	+	1	0	0	0
hsa-miR-424-5p	ENSG00000134369	NAV1	protein_coding	chr1	201752888	201752916	201752888	201752916	+	0	0	0	0
hsa-miR-424-5p	ENSG00000134369	NAV1	protein_coding	chr1	201791256	201791261	201791234	201791262	+	1	1	1	1
hsa-miR-424-5p	ENSG00000198700	IPO9	protein_coding	chr1	201845656	201845662	201845635	201845663	+	1	0	0	0
hsa-miR-424-5p	ENSG00000198700	IPO9	protein_coding	chr1	201847291	201847297	201847270	201847298	+	1	0	1	0
hsa-miR-424-5p	ENSG00000198700	IPO9	protein_coding	chr1	201848100	201848105	201848078	201848106	+	1	0	0	0
hsa-miR-424-5p	ENSG00000198700	IPO9	protein_coding	chr1	201852105	201852107	201852080	201852111	+	2	0	2	2
hsa-miR-424-5p	ENSG00000133067	LGR6	protein_coding	chr1	202288217	202288245	202288217	202288245	+	0	0	0	0
hsa-miR-424-5p	ENSG00000077157	PPP1R12B	protein_coding	chr1	202549992	202549998	202549971	202549999	+	1	0	0	0
hsa-miR-424-5p	ENSG00000077157	PPP1R12B	protein_coding	chr1	202551288	202551316	202551288	202551316	+	0	0	0	0
hsa-miR-424-5p	ENSG00000077157	PPP1R12B	protein_coding	chr1	202552143	202552148	202552121	202552149	+	1	0	0	0
hsa-miR-424-5p	ENSG00000077157	PPP1R12B	protein_coding	chr1	202552817	202552823	202552796	202552843	+	1	0	0	0
hsa-miR-424-5p	ENSG00000163444	TMEM183A	protein_coding	chr1	202985183	202985209	202985181	202985209	+	0	1	0	0
hsa-miR-424-5p	ENSG00000163444	TMEM183A	protein_coding	chr1	202993314	202993320	202993293	202993321	+	0	0	0	0
hsa-miR-424-5p	ENSG00000163444	TMEM183A	protein_coding	chr1	202993672	202993678	202993651	202993679	+	0	0	0	0
hsa-miR-424-5p	ENSG00000159388	BTG2	protein_coding	chr1	203276498	203276518	203276490	203276518	+	0	1	0	0
hsa-miR-424-5p	ENSG00000159388	BTG2	protein_coding	chr1	203276748	203276753	203276726	203276754	+	1	0	0	0
hsa-miR-424-5p	ENSG00000159388	BTG2	protein_coding	chr1	203277147	203277152	203277125	203277153	+	1	0	0	0
hsa-miR-424-5p	ENSG00000159388	BTG2	protein_coding	chr1	203277321	203277327	203277300	203277328	+	1	1	1	1
hsa-miR-424-5p	ENSG00000159388	BTG2	protein_coding	chr1	203277452	203277458	203277431	203277459	+	1	1	1	1
hsa-miR-424-5p	ENSG00000058668	ATP2B4	protein_coding	chr1	203709078	203709083	203709078	203709083	+	1	0	0	0
hsa-miR-424-5p	ENSG00000058673	ZC3H11A	protein_coding	chr1	203819710	203819738	203819710	203819738	+	0	0	0	0
hsa-miR-424-5p	ENSG00000257315	ZBED6	protein_coding	chr1	203819710	203819738	203819710	203819738	+	0	0	0	0
hsa-miR-424-5p	ENSG00000058673	ZC3H11A	protein_coding	chr1	203821944	203821949	203821922	203821950	+	1	0	0	1
hsa-miR-424-5p	ENSG00000257315	ZBED6	protein_coding	chr1	203821944	203821949	203821922	203821950	+	1	0	0	1
hsa-miR-424-5p	ENSG00000058673	ZC3H11A	protein_coding	chr1	203822124	203822130	203822103	203822131	+	1	1	0	0
hsa-miR-424-5p	ENSG00000257315	ZBED6	protein_coding	chr1	203822124	203822130	203822103	203822131	+	1	1	0	0
hsa-miR-424-5p	ENSG00000143842	SOX13	protein_coding	chr1	204095777	204095782	204095777	204095782	+	1	0	0	0
hsa-miR-424-5p	ENSG00000163531	NFASC	protein_coding	chr1	204986371	204986377	204986370	204986377	+	1	0	0	1
hsa-miR-424-5p	ENSG00000117266	CDK18	protein_coding	chr1	205500744	205500749	205500722	205500750	+	1	0	0	0
hsa-miR-424-5p	ENSG00000174514	MFSD4A	protein_coding	chr1	205561279	205561300	205561279	205561300	+	0	1	0	0
hsa-miR-424-5p	ENSG00000163486	SRGAP2	protein_coding	chr1	206628511	206628517	206628495	206628518	+	1	1	1	0
hsa-miR-424-5p	ENSG00000163486	SRGAP2	protein_coding	chr1	206628540	206628546	206628526	206628547	+	1	1	0	0
hsa-miR-424-5p	ENSG00000266094	RASSF5	protein_coding	chr1	206762232	206762238	206762211	206762239	+	1	1	1	1
hsa-miR-424-5p	ENSG00000162889	MAPKAPK2	protein_coding	chr1	206906005	206906011	206905991	206906012	+	1	1	0	0
hsa-miR-424-5p	ENSG00000123836	PFKFB2	protein_coding	chr1	207247924	207247929	207247924	207247929	+	1	0	0	0
hsa-miR-424-5p	ENSG00000123689	G0S2	protein_coding	chr1	209849563	209849569	209849542	209849570	+	1	1	1	1
hsa-miR-424-5p	ENSG00000117597	DIEXF	protein_coding	chr1	210025218	210025224	210025204	210025225	+	1	1	0	0
hsa-miR-424-5p	ENSG00000143469	SYT14	protein_coding	chr1	210187020	210187039	210187020	210187039	+	0	1	0	0
hsa-miR-424-5p	ENSG00000117625	RCOR3	protein_coding	chr1	211489325	211489331	211489304	211489332	+	1	1	1	1
hsa-miR-424-5p	ENSG00000082512	TRAF5	protein_coding	chr1	211547398	211547403	211547398	211547403	+	1	0	0	0
hsa-miR-424-5p	ENSG00000203705	TATDN3	protein_coding	chr1	212988694	212988700	212988680	212988701	+	1	1	0	0
hsa-miR-424-5p	ENSG00000117707	PROX1	protein_coding	chr1	214209162	214209167	214209162	214209167	+	0	0	0	0
hsa-miR-424-5p	ENSG00000117707	PROX1	protein_coding	chr1	214210036	214210041	214210036	214210041	+	0	0	0	0
hsa-miR-424-5p	ENSG00000117707	PROX1	protein_coding	chr1	214210451	214210456	214210451	214210456	+	0	0	0	0
hsa-miR-424-5p	ENSG00000082482	KCNK2	protein_coding	chr1	215368358	215368379	215368358	215368379	+	0	1	0	0
hsa-miR-424-5p	ENSG00000136636	KCTD3	protein_coding	chr1	215794858	215794863	215794858	215794863	+	1	0	0	0
hsa-miR-424-5p	ENSG00000143353	LYPLAL1	protein_coding	chr1	219385672	219385678	219385651	219385679	+	0	1	0	0
hsa-miR-424-5p	ENSG00000143353	LYPLAL1	protein_coding	chr1	219386184	219386189	219386162	219386190	+	0	0	0	0
hsa-miR-424-5p	ENSG00000154305	MIA3	protein_coding	chr1	222840316	222840322	222840302	222840323	+	1	1	0	0
hsa-miR-424-5p	ENSG00000143756	FBXO28	protein_coding	chr1	224349303	224349325	224349303	224349325	+	0	1	0	0
hsa-miR-424-5p	ENSG00000143801	PSEN2	protein_coding	chr1	227075810	227075833	227075810	227075833	+	0	1	0	0
hsa-miR-424-5p	ENSG00000163050	COQ8A	protein_coding	chr1	227175080	227175083	227175078	227175086	+	2	0	0	0
hsa-miR-424-5p	ENSG00000181450	ZNF678	protein_coding	chr1	227751322	227751344	227751322	227751344	+	0	1	0	0
hsa-miR-424-5p	ENSG00000143740	SNAP47	protein_coding	chr1	227968572	227968578	227968572	227968578	+	1	0	0	0
hsa-miR-424-5p	ENSG00000154342	WNT3A	protein_coding	chr1	228248938	228248943	228248916	228248944	+	1	1	1	1
hsa-miR-424-5p	ENSG00000181873	IBA57	protein_coding	chr1	228364756	228364759	228364754	228364762	+	2	0	0	0
hsa-miR-424-5p	ENSG00000116574	RHOU	protein_coding	chr1	228880889	228880894	228880889	228880894	+	1	0	0	0
hsa-miR-424-5p	ENSG00000143641	GALNT2	protein_coding	chr1	230417242	230417247	230417242	230417247	+	1	0	0	0
hsa-miR-424-5p	ENSG00000010072	SPRTN	protein_coding	chr1	231490514	231490520	231490514	231490521	+	0	0	0	1
hsa-miR-424-5p	ENSG00000143674	MAP3K21	protein_coding	chr1	233518537	233518543	233518516	233518544	+	1	1	0	1
hsa-miR-424-5p	ENSG00000135750	KCNK1	protein_coding	chr1	233807562	233807568	233807550	233807569	+	1	1	0	0
hsa-miR-424-5p	ENSG00000186197	EDARADD	protein_coding	chr1	236646561	236646566	236646561	236646566	+	1	0	0	0
hsa-miR-424-5p	ENSG00000186197	EDARADD	protein_coding	chr1	236647139	236647144	236647139	236647144	+	1	0	0	0
hsa-miR-424-5p	ENSG00000116984	MTR	protein_coding	chr1	237064093	237064099	237064093	237064099	+	0	0	0	0
hsa-miR-424-5p	ENSG00000116984	MTR	protein_coding	chr1	237065506	237065512	237065506	237065512	+	0	0	0	0
hsa-miR-424-5p	ENSG00000133019	CHRM3	protein_coding	chr1	240072403	240072428	240072400	240072431	+	0	0	0	0
hsa-miR-424-5p	ENSG00000133019	CHRM3	protein_coding	chr1	240074126	240074131	240074104	240074132	+	0	0	0	0
hsa-miR-424-5p	ENSG00000121644	DESI2	protein_coding	chr1	244869993	244869998	244869993	244869998	+	1	0	0	0
hsa-miR-424-5p	ENSG00000162722	TRIM58	protein_coding	chr1	248040921	248040926	248040921	248040926	+	1	0	0	0
hsa-miR-424-5p	ENSG00000196372	ASB13	protein_coding	chr10	5682126	5682131	5682126	5682131	-	1	0	0	0
hsa-miR-424-5p	ENSG00000196372	ASB13	protein_coding	chr10	5682138	5682144	5682138	5682144	-	1	0	0	0
hsa-miR-424-5p	ENSG00000057608	GDI2	protein_coding	chr10	5807643	5807643	5807637	5807660	-	3	1	0	3
hsa-miR-424-5p	ENSG00000134470	IL15RA	protein_coding	chr10	5994569	5994574	5994569	5994574	-	1	0	0	0
hsa-miR-424-5p	ENSG00000148429	USP6NL	protein_coding	chr10	11502696	11502701	11502695	11502723	-	1	0	0	0
hsa-miR-424-5p	ENSG00000148429	USP6NL	protein_coding	chr10	11504270	11504276	11504269	11504297	-	1	1	0	1
hsa-miR-424-5p	ENSG00000151468	CCDC3	protein_coding	chr10	12938934	12938939	12938934	12938939	-	1	0	0	0
hsa-miR-424-5p	ENSG00000151474	FRMD4A	protein_coding	chr10	13687987	13687992	13687987	13687992	-	1	0	0	0
hsa-miR-424-5p	ENSG00000065809	FAM107B	protein_coding	chr10	14561981	14561986	14561981	14561986	-	1	0	0	0
hsa-miR-424-5p	ENSG00000148468	FAM171A1	protein_coding	chr10	15253691	15253696	15253691	15253696	-	1	0	0	0
hsa-miR-424-5p	ENSG00000148468	FAM171A1	protein_coding	chr10	15254433	15254438	15254433	15254438	-	1	0	0	0
hsa-miR-424-5p	ENSG00000078114	NEBL	protein_coding	chr10	21074446	21074448	21074442	21074470	-	1	0	2	1
hsa-miR-424-5p	ENSG00000107897	ACBD5	protein_coding	chr10	27486018	27486023	27486018	27486023	-	1	0	0	0
hsa-miR-424-5p	ENSG00000150051	MKX	protein_coding	chr10	27962017	27962023	27962016	27962044	-	1	1	0	1
hsa-miR-424-5p	ENSG00000150051	MKX	protein_coding	chr10	27962704	27962709	27962703	27962731	-	1	0	0	0
hsa-miR-424-5p	ENSG00000150054	MPP7	protein_coding	chr10	28342639	28342642	28342636	28342644	-	2	0	0	0
hsa-miR-424-5p	ENSG00000197321	SVIL	protein_coding	chr10	29746909	29746914	29746909	29746914	-	1	0	0	0
hsa-miR-424-5p	ENSG00000197321	SVIL	protein_coding	chr10	29839753	29839775	29839753	29839775	-	0	0	0	0
hsa-miR-424-5p	ENSG00000165757	JCAD	protein_coding	chr10	30306275	30306281	30306274	30306302	-	1	0	0	0
hsa-miR-424-5p	ENSG00000165757	JCAD	protein_coding	chr10	30306706	30306711	30306705	30306733	-	1	0	0	0
hsa-miR-424-5p	ENSG00000107951	MTPAP	protein_coding	chr10	30602285	30602290	30602285	30602290	-	1	0	0	0
hsa-miR-424-5p	ENSG00000165322	ARHGAP12	protein_coding	chr10	32096407	32096413	32096406	32096434	-	1	1	1	0
hsa-miR-424-5p	ENSG00000170759	KIF5B	protein_coding	chr10	32300068	32300073	32300067	32300095	-	0	0	1	0
hsa-miR-424-5p	ENSG00000170759	KIF5B	protein_coding	chr10	32300274	32300280	32300273	32300301	-	1	1	1	0
hsa-miR-424-5p	ENSG00000170759	KIF5B	protein_coding	chr10	32324504	32324532	32324504	32324532	-	0	0	0	0
hsa-miR-424-5p	ENSG00000120616	EPC1	protein_coding	chr10	32557191	32557197	32557190	32557218	-	0	0	0	1
hsa-miR-424-5p	ENSG00000120616	EPC1	protein_coding	chr10	32561047	32561075	32561047	32561075	-	0	0	0	0
hsa-miR-424-5p	ENSG00000108094	CUL2	protein_coding	chr10	35298816	35298822	35298815	35298843	-	1	1	1	1
hsa-miR-424-5p	ENSG00000108094	CUL2	protein_coding	chr10	35338625	35338653	35338625	35338653	-	0	0	0	0
hsa-miR-424-5p	ENSG00000196693	ZNF33B	protein_coding	chr10	43084606	43084611	43084606	43084611	-	1	0	0	0
hsa-miR-424-5p	ENSG00000108091	CCDC6	protein_coding	chr10	61549309	61549314	61549308	61549328	-	1	1	1	0
hsa-miR-424-5p	ENSG00000108091	CCDC6	protein_coding	chr10	61549969	61549974	61549968	61549989	-	1	1	1	1
hsa-miR-424-5p	ENSG00000151150	ANK3	protein_coding	chr10	61946509	61946537	61946509	61946537	-	0	0	0	0
hsa-miR-424-5p	ENSG00000151150	ANK3	protein_coding	chr10	61956290	61956318	61956290	61956318	-	0	0	0	0
hsa-miR-424-5p	ENSG00000151150	ANK3	protein_coding	chr10	62023626	62023654	62023626	62023654	-	0	0	0	0
hsa-miR-424-5p	ENSG00000171988	JMJD1C	protein_coding	chr10	64936139	64936144	64936138	64936166	-	0	0	0	0
hsa-miR-424-5p	ENSG00000171988	JMJD1C	protein_coding	chr10	64943316	64943322	64943315	64943322	-	0	0	0	1
hsa-miR-424-5p	ENSG00000171988	JMJD1C	protein_coding	chr10	64967525	64967553	64967525	64967553	-	0	0	0	0
hsa-miR-424-5p	ENSG00000171988	JMJD1C	protein_coding	chr10	64975155	64975183	64975155	64975183	-	0	0	0	0
hsa-miR-424-5p	ENSG00000148634	HERC4	protein_coding	chr10	69750715	69750721	69750714	69750721	-	0	0	0	1
hsa-miR-424-5p	ENSG00000148634	HERC4	protein_coding	chr10	69792544	69792550	69792544	69792550	-	0	0	0	0
hsa-miR-424-5p	ENSG00000148634	HERC4	protein_coding	chr10	69793856	69793861	69793856	69793861	-	0	0	0	0
hsa-miR-424-5p	ENSG00000108187	PBLD	protein_coding	chr10	70043910	70043915	70043910	70043915	-	1	0	0	0
hsa-miR-424-5p	ENSG00000156521	TYSND1	protein_coding	chr10	71899746	71899751	71899746	71899751	-	1	0	0	0
hsa-miR-424-5p	ENSG00000079332	SAR1A	protein_coding	chr10	71910139	71910144	71910139	71910144	-	1	0	0	0
hsa-miR-424-5p	ENSG00000172731	LRRC20	protein_coding	chr10	72060873	72060878	72060873	72060878	-	1	0	0	0
hsa-miR-424-5p	ENSG00000197746	PSAP	protein_coding	chr10	73576374	73576379	73576374	73576379	-	1	0	0	0
hsa-miR-424-5p	ENSG00000197746	PSAP	protein_coding	chr10	73576629	73576634	73576629	73576634	-	1	0	0	0
hsa-miR-424-5p	ENSG00000197746	PSAP	protein_coding	chr10	73577004	73577009	73577004	73577009	-	1	0	0	0
hsa-miR-424-5p	ENSG00000148719	DNAJB12	protein_coding	chr10	74094183	74094188	74094183	74094188	-	1	0	0	0
hsa-miR-424-5p	ENSG00000107745	MICU1	protein_coding	chr10	74127870	74127873	74127867	74127876	-	2	0	1	0
hsa-miR-424-5p	ENSG00000213551	DNAJC9	protein_coding	chr10	75002825	75002831	75002824	75002845	-	1	1	0	0
hsa-miR-424-5p	ENSG00000182180	MRPS16	protein_coding	chr10	75009266	75009271	75009266	75009271	-	1	0	0	0
hsa-miR-424-5p	ENSG00000107758	PPP3CB	protein_coding	chr10	75196567	75196572	75196567	75196572	-	0	0	0	0
hsa-miR-424-5p	ENSG00000107758	PPP3CB	protein_coding	chr10	75197026	75197032	75197025	75197046	-	1	1	1	0
hsa-miR-424-5p	ENSG00000148660	CAMK2G	protein_coding	chr10	75573437	75573441	75573433	75573454	-	2	1	0	0
hsa-miR-424-5p	ENSG00000185009	AP3M1	protein_coding	chr10	75882991	75882997	75882991	75882997	-	1	0	0	1
hsa-miR-424-5p	ENSG00000165655	ZNF503	protein_coding	chr10	77158421	77158426	77158421	77158426	-	1	0	0	0
hsa-miR-424-5p	ENSG00000151208	DLG5	protein_coding	chr10	79551721	79551726	79551721	79551726	-	1	0	0	0
hsa-miR-424-5p	ENSG00000122359	ANXA11	protein_coding	chr10	81915377	81915383	81915376	81915404	-	1	1	0	1
hsa-miR-424-5p	ENSG00000062650	WAPL	protein_coding	chr10	88196960	88196966	88196944	88196987	-	1	1	1	1
hsa-miR-424-5p	ENSG00000148672	GLUD1	protein_coding	chr10	88810943	88810949	88810942	88810970	-	1	1	1	1
hsa-miR-424-5p	ENSG00000138138	ATAD1	protein_coding	chr10	89544281	89544309	89544281	89544309	-	0	0	0	0
hsa-miR-424-5p	ENSG00000138138	ATAD1	protein_coding	chr10	89552440	89552468	89552440	89552468	-	0	0	0	0
hsa-miR-424-5p	ENSG00000152782	PANK1	protein_coding	chr10	91344105	91344111	91344104	91344132	-	1	1	0	1
hsa-miR-424-5p	ENSG00000107864	CPEB3	protein_coding	chr10	93811274	93811279	93811273	93811301	-	1	1	1	1
hsa-miR-424-5p	ENSG00000119912	IDE	protein_coding	chr10	94212716	94212721	94212716	94212721	-	0	0	0	0
hsa-miR-424-5p	ENSG00000059573	ALDH18A1	protein_coding	chr10	97366207	97366212	97366207	97366212	-	1	0	0	0
hsa-miR-424-5p	ENSG00000171311	EXOSC1	protein_coding	chr10	99196138	99196144	99196137	99196159	-	1	1	0	0
hsa-miR-424-5p	ENSG00000155229	MMS19	protein_coding	chr10	99218169	99218175	99218168	99218196	-	1	1	0	0
hsa-miR-424-5p	ENSG00000155229	MMS19	protein_coding	chr10	99219267	99219273	99219267	99219273	-	0	0	0	1
hsa-miR-424-5p	ENSG00000155229	MMS19	protein_coding	chr10	99219810	99219816	99219809	99219837	-	0	0	0	1
hsa-miR-424-5p	ENSG00000155229	MMS19	protein_coding	chr10	99225587	99225615	99225587	99225615	-	0	0	0	0
hsa-miR-424-5p	ENSG00000171160	MORN4	protein_coding	chr10	99375650	99375656	99375649	99375672	-	1	1	0	0
hsa-miR-424-5p	ENSG00000213341	CHUK	protein_coding	chr10	101948382	101948386	101948358	101948409	-	1	1	0	0
hsa-miR-424-5p	ENSG00000213341	CHUK	protein_coding	chr10	101948890	101948895	101948889	101948917	-	1	0	0	0
hsa-miR-424-5p	ENSG00000120029	C10orf76	protein_coding	chr10	103605771	103605774	103605767	103605798	-	2	1	0	1
hsa-miR-424-5p	ENSG00000138107	ACTR1A	protein_coding	chr10	104240190	104240218	104240190	104240218	-	0	0	0	0
hsa-miR-424-5p	ENSG00000138107	ACTR1A	protein_coding	chr10	104240263	104240269	104240262	104240290	-	1	0	1	1
hsa-miR-424-5p	ENSG00000138175	ARL3	protein_coding	chr10	104435110	104435115	104435110	104435115	-	1	0	0	0
hsa-miR-424-5p	ENSG00000138175	ARL3	protein_coding	chr10	104436581	104436587	104436580	104436608	-	1	1	0	1
hsa-miR-424-5p	ENSG00000076685	NT5C2	protein_coding	chr10	104847942	104847947	104847942	104847947	-	1	0	0	0
hsa-miR-424-5p	ENSG00000076685	NT5C2	protein_coding	chr10	104848882	104848887	104848882	104848887	-	1	0	0	0
hsa-miR-424-5p	ENSG00000107957	SH3PXD2A	protein_coding	chr10	105357191	105357196	105357191	105357196	-	1	0	0	0
hsa-miR-424-5p	ENSG00000107957	SH3PXD2A	protein_coding	chr10	105358482	105358487	105358482	105358487	-	1	0	0	0
hsa-miR-424-5p	ENSG00000119927	GPAM	protein_coding	chr10	113911392	113911395	113911389	113911397	-	2	0	0	0
hsa-miR-424-5p	ENSG00000119927	GPAM	protein_coding	chr10	113912915	113912921	113912915	113912921	-	1	0	0	0
hsa-miR-424-5p	ENSG00000099204	ABLIM1	protein_coding	chr10	116190997	116191002	116190997	116191002	-	1	0	0	0
hsa-miR-424-5p	ENSG00000151892	GFRA1	protein_coding	chr10	117817850	117817855	117817850	117817855	-	0	0	0	0
hsa-miR-424-5p	ENSG00000151892	GFRA1	protein_coding	chr10	117820275	117820280	117820275	117820280	-	0	0	0	0
hsa-miR-424-5p	ENSG00000151892	GFRA1	protein_coding	chr10	117822756	117822761	117822756	117822761	-	0	0	0	0
hsa-miR-424-5p	ENSG00000165650	PDZD8	protein_coding	chr10	119040248	119040254	119040247	119040275	-	0	0	0	1
hsa-miR-424-5p	ENSG00000107560	RAB11FIP2	protein_coding	chr10	119765024	119765030	119765023	119765051	-	1	0	0	1
hsa-miR-424-5p	ENSG00000107560	RAB11FIP2	protein_coding	chr10	119765573	119765578	119765572	119765600	-	1	1	1	1
hsa-miR-424-5p	ENSG00000107560	RAB11FIP2	protein_coding	chr10	119767792	119767797	119767791	119767819	-	1	0	0	0
hsa-miR-424-5p	ENSG00000107560	RAB11FIP2	protein_coding	chr10	119767839	119767844	119767838	119767866	-	1	0	0	0
hsa-miR-424-5p	ENSG00000151893	CACUL1	protein_coding	chr10	120444776	120444781	120444775	120444803	-	1	0	0	0
hsa-miR-424-5p	ENSG00000151893	CACUL1	protein_coding	chr10	120445447	120445452	120445446	120445474	-	1	1	1	1
hsa-miR-424-5p	ENSG00000151893	CACUL1	protein_coding	chr10	120450823	120450851	120450823	120450851	-	0	0	0	0
hsa-miR-424-5p	ENSG00000107581	EIF3A	protein_coding	chr10	120794595	120794601	120794594	120794622	-	1	1	1	1
hsa-miR-424-5p	ENSG00000066468	FGFR2	protein_coding	chr10	123238552	123238558	123238551	123238572	-	1	1	0	0
hsa-miR-424-5p	ENSG00000121898	CPXM2	protein_coding	chr10	125505776	125505781	125505776	125505781	-	1	0	0	0
hsa-miR-424-5p	ENSG00000188690	UROS	protein_coding	chr10	127491179	127491185	127491178	127491206	-	0	0	0	0
hsa-miR-424-5p	ENSG00000188916	FAM196A	protein_coding	chr10	128935050	128935055	128935049	128935055	-	1	0	1	0
hsa-miR-424-5p	ENSG00000165752	STK32C	protein_coding	chr10	134021263	134021268	134021263	134021268	-	1	0	0	0
hsa-miR-424-5p	ENSG00000127884	ECHS1	protein_coding	chr10	135176053	135176058	135176053	135176058	-	1	0	0	0
hsa-miR-424-5p	ENSG00000015171	ZMYND11	protein_coding	chr10	300504	300509	300504	300509	+	1	0	0	0
hsa-miR-424-5p	ENSG00000047056	WDR37	protein_coding	chr10	1177422	1177427	1177400	1177428	+	1	0	0	0
hsa-miR-424-5p	ENSG00000047056	WDR37	protein_coding	chr10	1177577	1177583	1177556	1177584	+	1	0	0	1
hsa-miR-424-5p	ENSG00000067057	PFKP	protein_coding	chr10	3179890	3179896	3179890	3179896	+	0	0	0	0
hsa-miR-424-5p	ENSG00000170525	PFKFB3	protein_coding	chr10	6275700	6275705	6275700	6275705	+	1	0	0	0
hsa-miR-424-5p	ENSG00000134463	ECHDC3	protein_coding	chr10	11805640	11805645	11805640	11805645	+	1	0	0	0
hsa-miR-424-5p	ENSG00000181192	DHTKD1	protein_coding	chr10	12164020	12164026	12164006	12164027	+	1	1	0	1
hsa-miR-424-5p	ENSG00000065665	SEC61A2	protein_coding	chr10	12197784	12197806	12197784	12197806	+	0	1	0	0
hsa-miR-424-5p	ENSG00000151465	CDC123	protein_coding	chr10	12292387	12292392	12292387	12292392	+	1	0	0	0
hsa-miR-424-5p	ENSG00000165983	PTER	protein_coding	chr10	16554297	16554303	16554283	16554304	+	1	1	0	0
hsa-miR-424-5p	ENSG00000165997	ARL5B	protein_coding	chr10	18964212	18964217	18964212	18964218	+	1	0	0	1
hsa-miR-424-5p	ENSG00000165997	ARL5B	protein_coding	chr10	18965064	18965069	18965064	18965069	+	1	0	0	0
hsa-miR-424-5p	ENSG00000165997	ARL5B	protein_coding	chr10	18968150	18968155	18968150	18968155	+	0	0	0	0
hsa-miR-424-5p	ENSG00000165997	ARL5B	protein_coding	chr10	18969611	18969616	18969611	18969616	+	0	0	0	0
hsa-miR-424-5p	ENSG00000120594	PLXDC2	protein_coding	chr10	20568856	20568861	20568856	20568861	+	1	0	0	0
hsa-miR-424-5p	ENSG00000078403	MLLT10	protein_coding	chr10	22031618	22031623	22031596	22031624	+	1	0	0	0
hsa-miR-424-5p	ENSG00000148450	MSRB2	protein_coding	chr10	23409897	23409903	23409876	23409904	+	1	1	0	0
hsa-miR-424-5p	ENSG00000108100	CCNY	protein_coding	chr10	35858528	35858534	35858514	35858535	+	1	1	0	0
hsa-miR-424-5p	ENSG00000165731	RET	protein_coding	chr10	43572735	43572757	43572729	43572763	+	0	0	0	0
hsa-miR-424-5p	ENSG00000165731	RET	protein_coding	chr10	43609976	43610004	43609976	43610004	+	0	0	0	0
hsa-miR-424-5p	ENSG00000165731	RET	protein_coding	chr10	43624580	43624586	43624559	43624587	+	1	1	0	0
hsa-miR-424-5p	ENSG00000165731	RET	protein_coding	chr10	43624880	43624885	43624858	43624886	+	1	1	1	1
hsa-miR-424-5p	ENSG00000107551	RASSF4	protein_coding	chr10	45484804	45484810	45484783	45484811	+	0	0	0	1
hsa-miR-424-5p	ENSG00000107643	MAPK8	protein_coding	chr10	49643059	49643064	49643037	49643065	+	1	0	0	0
hsa-miR-424-5p	ENSG00000107643	MAPK8	protein_coding	chr10	49643366	49643372	49643345	49643373	+	0	0	0	1
hsa-miR-424-5p	ENSG00000107643	MAPK8	protein_coding	chr10	49644370	49644376	49644349	49644377	+	0	0	0	1
hsa-miR-424-5p	ENSG00000128815	WDFY4	protein_coding	chr10	50177264	50177267	50177240	50177271	+	0	0	0	0
hsa-miR-424-5p	ENSG00000266412	NCOA4	protein_coding	chr10	51590347	51590353	51590334	51590354	+	1	1	0	0
hsa-miR-424-5p	ENSG00000185532	PRKG1	protein_coding	chr10	54048558	54048586	54048558	54048586	+	0	0	0	0
hsa-miR-424-5p	ENSG00000122870	BICC1	protein_coding	chr10	60558967	60558995	60558967	60558995	+	0	0	0	0
hsa-miR-424-5p	ENSG00000122870	BICC1	protein_coding	chr10	60580190	60580218	60580190	60580218	+	0	0	0	0
hsa-miR-424-5p	ENSG00000122870	BICC1	protein_coding	chr10	60589450	60589478	60589450	60589478	+	0	0	0	0
hsa-miR-424-5p	ENSG00000165476	REEP3	protein_coding	chr10	65381638	65381644	65381621	65381645	+	1	1	0	0
hsa-miR-424-5p	ENSG00000138336	TET1	protein_coding	chr10	70453498	70453503	70453498	70453503	+	1	0	0	0
hsa-miR-424-5p	ENSG00000165732	DDX21	protein_coding	chr10	70743723	70743728	70743707	70743729	+	1	1	0	0
hsa-miR-424-5p	ENSG00000156515	HK1	protein_coding	chr10	71161366	71161371	71161349	71161372	+	1	1	0	0
hsa-miR-424-5p	ENSG00000099282	TSPAN15	protein_coding	chr10	71267250	71267255	71267250	71267255	+	1	0	0	0
hsa-miR-424-5p	ENSG00000148730	EIF4EBP2	protein_coding	chr10	72182041	72182046	72182041	72182046	+	1	0	0	0
hsa-miR-424-5p	ENSG00000148730	EIF4EBP2	protein_coding	chr10	72182638	72182643	72182638	72182643	+	1	0	0	0
hsa-miR-424-5p	ENSG00000148730	EIF4EBP2	protein_coding	chr10	72185931	72185936	72185931	72185936	+	0	0	0	0
hsa-miR-424-5p	ENSG00000148730	EIF4EBP2	protein_coding	chr10	72186801	72186806	72186801	72186806	+	0	0	0	0
hsa-miR-424-5p	ENSG00000107719	PALD1	protein_coding	chr10	72326925	72326931	72326925	72326931	+	1	0	0	0
hsa-miR-424-5p	ENSG00000107719	PALD1	protein_coding	chr10	72327541	72327546	72327541	72327546	+	1	0	0	0
hsa-miR-424-5p	ENSG00000166224	SGPL1	protein_coding	chr10	72638677	72638682	72638655	72638683	+	1	0	0	0
hsa-miR-424-5p	ENSG00000166224	SGPL1	protein_coding	chr10	72640204	72640210	72640183	72640211	+	0	1	0	0
hsa-miR-424-5p	ENSG00000107731	UNC5B	protein_coding	chr10	72972765	72972781	72972753	72972793	+	0	0	0	0
hsa-miR-424-5p	ENSG00000107731	UNC5B	protein_coding	chr10	73059869	73059876	73059848	73059876	+	0	1	0	1
hsa-miR-424-5p	ENSG00000122863	CHST3	protein_coding	chr10	73768939	73768944	73768939	73768944	+	1	0	0	0
hsa-miR-424-5p	ENSG00000122863	CHST3	protein_coding	chr10	73771036	73771043	73771036	73771043	+	1	0	0	0
hsa-miR-424-5p	ENSG00000122863	CHST3	protein_coding	chr10	73772616	73772621	73772616	73772621	+	1	0	0	0
hsa-miR-424-5p	ENSG00000168209	DDIT4	protein_coding	chr10	74035279	74035284	74035279	74035284	+	1	0	0	0
hsa-miR-424-5p	ENSG00000156026	MCU	protein_coding	chr10	74647066	74647066	74647039	74647076	+	3	1	0	0
hsa-miR-424-5p	ENSG00000156026	MCU	protein_coding	chr10	74647069	74647075	74647069	74647075	+	1	0	0	0
hsa-miR-424-5p	ENSG00000122861	PLAU	protein_coding	chr10	75675107	75675128	75675107	75675128	+	0	1	0	0
hsa-miR-424-5p	ENSG00000035403	VCL	protein_coding	chr10	75849077	75849105	75849077	75849105	+	0	0	0	0
hsa-miR-424-5p	ENSG00000035403	VCL	protein_coding	chr10	75871705	75871733	75871705	75871733	+	0	0	0	0
hsa-miR-424-5p	ENSG00000035403	VCL	protein_coding	chr10	75878466	75878472	75878445	75878473	+	1	1	0	0
hsa-miR-424-5p	ENSG00000035403	VCL	protein_coding	chr10	75879132	75879138	75879111	75879139	+	1	1	0	0
hsa-miR-424-5p	ENSG00000156671	SAMD8	protein_coding	chr10	76937582	76937587	76937582	76937587	+	0	0	0	0
hsa-miR-424-5p	ENSG00000156671	SAMD8	protein_coding	chr10	76937734	76937739	76937734	76937739	+	0	0	0	0
hsa-miR-424-5p	ENSG00000108175	ZMIZ1	protein_coding	chr10	81074071	81074076	81074071	81074076	+	1	0	0	0
hsa-miR-424-5p	ENSG00000108179	PPIF	protein_coding	chr10	81113730	81113735	81113730	81113735	+	1	0	0	0
hsa-miR-424-5p	ENSG00000108179	PPIF	protein_coding	chr10	81114194	81114200	81114180	81114201	+	1	1	0	1
hsa-miR-424-5p	ENSG00000253626	EIF5AL1	protein_coding	chr10	81273151	81273157	81273151	81273157	+	1	0	0	0
hsa-miR-424-5p	ENSG00000108219	TSPAN14	protein_coding	chr10	82278978	82278983	82278978	82278983	+	1	0	0	0
hsa-miR-424-5p	ENSG00000108219	TSPAN14	protein_coding	chr10	82279074	82279079	82279074	82279079	+	1	0	0	0
hsa-miR-424-5p	ENSG00000148600	CDHR1	protein_coding	chr10	85974429	85974435	85974429	85974435	+	1	0	0	0
hsa-miR-424-5p	ENSG00000173267	SNCG	protein_coding	chr10	88722893	88722899	88722872	88722900	+	1	1	0	0
hsa-miR-424-5p	ENSG00000173267	SNCG	protein_coding	chr10	88722961	88722967	88722940	88722968	+	1	1	0	1
hsa-miR-424-5p	ENSG00000198682	PAPSS2	protein_coding	chr10	89506840	89506845	89506840	89506845	+	1	0	0	0
hsa-miR-424-5p	ENSG00000171862	PTEN	protein_coding	chr10	89729547	89729553	89729526	89729554	+	0	0	0	0
hsa-miR-424-5p	ENSG00000180628	PCGF5	protein_coding	chr10	93038876	93038882	93038855	93038883	+	1	0	0	1
hsa-miR-424-5p	ENSG00000180628	PCGF5	protein_coding	chr10	93043477	93043483	93043456	93043484	+	1	0	0	0
hsa-miR-424-5p	ENSG00000180628	PCGF5	protein_coding	chr10	93043819	93043825	93043798	93043826	+	1	1	1	1
hsa-miR-424-5p	ENSG00000095564	BTAF1	protein_coding	chr10	93719805	93719833	93719805	93719833	+	0	0	0	0
hsa-miR-424-5p	ENSG00000095564	BTAF1	protein_coding	chr10	93773474	93773502	93773474	93773502	+	0	0	0	0
hsa-miR-424-5p	ENSG00000095564	BTAF1	protein_coding	chr10	93788714	93788720	93788693	93788721	+	1	1	0	1
hsa-miR-424-5p	ENSG00000198060	2019-03-05	protein_coding	chr10	94111063	94111066	94111039	94111070	+	2	1	0	1
hsa-miR-424-5p	ENSG00000198060	2019-03-05	protein_coding	chr10	94112815	94112820	94112793	94112821	+	1	0	0	0
hsa-miR-424-5p	ENSG00000138190	EXOC6	protein_coding	chr10	94714412	94714435	94714412	94714435	+	0	1	0	0
hsa-miR-424-5p	ENSG00000138180	CEP55	protein_coding	chr10	95288061	95288066	95288039	95288067	+	1	0	0	0
hsa-miR-424-5p	ENSG00000138180	CEP55	protein_coding	chr10	95288442	95288448	95288421	95288449	+	1	1	0	1
hsa-miR-424-5p	ENSG00000176273	SLC35G1	protein_coding	chr10	95661696	95661701	95661674	95661702	+	1	1	1	1
hsa-miR-424-5p	ENSG00000108239	TBC1D12	protein_coding	chr10	96294690	96294696	96294674	96294697	+	1	1	0	0
hsa-miR-424-5p	ENSG00000119969	HELLS	protein_coding	chr10	96352153	96352159	96352153	96352159	+	0	0	0	0
hsa-miR-424-5p	ENSG00000119969	HELLS	protein_coding	chr10	96354572	96354577	96354572	96354577	+	0	0	0	0
hsa-miR-424-5p	ENSG00000138109	CYP2C9	protein_coding	chr10	96748806	96748809	96748804	96748812	+	2	0	0	0
hsa-miR-424-5p	ENSG00000107443	CCNJ	protein_coding	chr10	97819833	97819838	97819818	97819839	+	1	1	1	0
hsa-miR-424-5p	ENSG00000177853	ZNF518A	protein_coding	chr10	97921561	97921566	97921561	97921566	+	1	0	0	0
hsa-miR-424-5p	ENSG00000196233	LCOR	protein_coding	chr10	98708817	98708845	98708817	98708845	+	0	0	0	0
hsa-miR-424-5p	ENSG00000196233	LCOR	protein_coding	chr10	98718691	98718696	98718669	98718697	+	0	0	1	0
hsa-miR-424-5p	ENSG00000196233	LCOR	protein_coding	chr10	98719938	98719943	98719916	98719944	+	0	0	0	0
hsa-miR-424-5p	ENSG00000196233	LCOR	protein_coding	chr10	98722512	98722518	98722491	98722519	+	0	0	1	1
hsa-miR-424-5p	ENSG00000171307	ZDHHC16	protein_coding	chr10	99211477	99211498	99211470	99211498	+	0	1	0	0
hsa-miR-424-5p	ENSG00000171307	ZDHHC16	protein_coding	chr10	99217053	99217059	99217032	99217060	+	1	0	0	0
hsa-miR-424-5p	ENSG00000171307	ZDHHC16	protein_coding	chr10	99217082	99217088	99217061	99217089	+	1	1	0	0
hsa-miR-424-5p	ENSG00000165886	UBTD1	protein_coding	chr10	99327807	99327835	99327807	99327835	+	0	0	0	0
hsa-miR-424-5p	ENSG00000165886	UBTD1	protein_coding	chr10	99329952	99329980	99329952	99329980	+	0	0	0	0
hsa-miR-424-5p	ENSG00000165886	UBTD1	protein_coding	chr10	99330643	99330648	99330621	99330649	+	1	0	0	0
hsa-miR-424-5p	ENSG00000155252	PI4K2A	protein_coding	chr10	99434549	99434552	99434547	99434555	+	2	0	0	1
hsa-miR-424-5p	ENSG00000155256	ZFYVE27	protein_coding	chr10	99517438	99517444	99517424	99517445	+	0	1	0	1
hsa-miR-424-5p	ENSG00000155256	ZFYVE27	protein_coding	chr10	99519252	99519257	99519252	99519257	+	1	0	0	0
hsa-miR-424-5p	ENSG00000198018	ENTPD7	protein_coding	chr10	101439525	101439553	101439525	101439553	+	0	0	0	0
hsa-miR-424-5p	ENSG00000198018	ENTPD7	protein_coding	chr10	101464480	101464486	101464459	101464487	+	1	0	0	1
hsa-miR-424-5p	ENSG00000099194	SCD	protein_coding	chr10	102121622	102121627	102121622	102121627	+	1	0	0	0
hsa-miR-424-5p	ENSG00000099194	SCD	protein_coding	chr10	102123808	102123813	102123808	102123813	+	1	0	0	0
hsa-miR-424-5p	ENSG00000166135	HIF1AN	protein_coding	chr10	102310604	102310609	102310604	102310609	+	1	0	0	0
hsa-miR-424-5p	ENSG00000166135	HIF1AN	protein_coding	chr10	102312264	102312269	102312264	102312269	+	1	0	0	0
hsa-miR-424-5p	ENSG00000119906	SLF2	protein_coding	chr10	102723910	102723916	102723896	102723917	+	1	1	0	0
hsa-miR-424-5p	ENSG00000107816	LZTS2	protein_coding	chr10	102767318	102767323	102767318	102767323	+	1	0	0	0
hsa-miR-424-5p	ENSG00000166167	BTRC	protein_coding	chr10	103285810	103285838	103285810	103285838	+	0	0	0	0
hsa-miR-424-5p	ENSG00000166167	BTRC	protein_coding	chr10	103313097	103313102	103313075	103313103	+	1	1	1	1
hsa-miR-424-5p	ENSG00000166167	BTRC	protein_coding	chr10	103314279	103314307	103314279	103314307	+	0	0	0	0
hsa-miR-424-5p	ENSG00000166167	BTRC	protein_coding	chr10	103315040	103315045	103315018	103315046	+	1	1	1	1
hsa-miR-424-5p	ENSG00000148840	PPRC1	protein_coding	chr10	103909870	103909875	103909870	103909876	+	1	0	1	0
hsa-miR-424-5p	ENSG00000107862	GBF1	protein_coding	chr10	104120787	104120815	104120787	104120815	+	0	0	0	0
hsa-miR-424-5p	ENSG00000107862	GBF1	protein_coding	chr10	104128019	104128047	104128019	104128047	+	0	0	0	0
hsa-miR-424-5p	ENSG00000107862	GBF1	protein_coding	chr10	104128119	104128147	104128119	104128147	+	0	0	0	0
hsa-miR-424-5p	ENSG00000107862	GBF1	protein_coding	chr10	104130187	104130195	104130167	104130215	+	0	0	0	0
hsa-miR-424-5p	ENSG00000138111	MFSD13A	protein_coding	chr10	104235771	104235777	104235771	104235777	+	1	0	0	0
hsa-miR-424-5p	ENSG00000156398	SFXN2	protein_coding	chr10	104498373	104498379	104498359	104498380	+	1	1	0	1
hsa-miR-424-5p	ENSG00000166272	WBP1L	protein_coding	chr10	104569674	104569695	104569674	104569695	+	0	1	0	0
hsa-miR-424-5p	ENSG00000166272	WBP1L	protein_coding	chr10	104575128	104575131	104575126	104575134	+	2	0	0	0
hsa-miR-424-5p	ENSG00000148842	CNNM2	protein_coding	chr10	104837853	104837859	104837832	104837860	+	1	1	0	1
hsa-miR-424-5p	ENSG00000148835	TAF5	protein_coding	chr10	105148103	105148109	105148087	105148110	+	1	1	1	0
hsa-miR-424-5p	ENSG00000148843	PDCD11	protein_coding	chr10	105179356	105179384	105179356	105179384	+	0	0	0	0
hsa-miR-424-5p	ENSG00000148843	PDCD11	protein_coding	chr10	105181184	105181212	105181184	105181212	+	0	0	0	0
hsa-miR-424-5p	ENSG00000148843	PDCD11	protein_coding	chr10	105205409	105205415	105205388	105205416	+	1	1	0	1
hsa-miR-424-5p	ENSG00000107954	NEURL1	protein_coding	chr10	105350665	105350670	105350665	105350670	+	1	0	0	0
hsa-miR-424-5p	ENSG00000107954	NEURL1	protein_coding	chr10	105352245	105352248	105352243	105352251	+	2	0	0	0
hsa-miR-424-5p	ENSG00000148700	ADD3	protein_coding	chr10	111894192	111894197	111894192	111894197	+	1	0	0	0
hsa-miR-424-5p	ENSG00000150593	PDCD4	protein_coding	chr10	112658241	112658243	112658216	112658267	+	1	2	0	1
hsa-miR-424-5p	ENSG00000150593	PDCD4	protein_coding	chr10	112658260	112658263	112658258	112658266	+	2	0	1	1
hsa-miR-424-5p	ENSG00000108061	SHOC2	protein_coding	chr10	112772704	112772710	112772683	112772711	+	1	1	1	1
hsa-miR-424-5p	ENSG00000108061	SHOC2	protein_coding	chr10	112773051	112773057	112773030	112773058	+	1	1	1	1
hsa-miR-424-5p	ENSG00000150594	ADRA2A	protein_coding	chr10	112839306	112839312	112839306	112839312	+	1	0	0	0
hsa-miR-424-5p	ENSG00000197142	ACSL5	protein_coding	chr10	114158686	114158714	114158686	114158714	+	0	0	0	0
hsa-miR-424-5p	ENSG00000197142	ACSL5	protein_coding	chr10	114171239	114171267	114171239	114171267	+	0	0	0	0
hsa-miR-424-5p	ENSG00000151532	VTI1A	protein_coding	chr10	114578287	114578293	114578266	114578294	+	1	1	1	1
hsa-miR-424-5p	ENSG00000148737	TCF7L2	protein_coding	chr10	114925751	114925756	114925751	114925756	+	1	0	0	0
hsa-miR-424-5p	ENSG00000196865	NHLRC2	protein_coding	chr10	115668544	115668551	115668523	115668551	+	0	0	0	1
hsa-miR-424-5p	ENSG00000151553	FAM160B1	protein_coding	chr10	116623280	116623286	116623267	116623287	+	1	1	0	1
hsa-miR-424-5p	ENSG00000188613	NANOS1	protein_coding	chr10	120791887	120791892	120791887	120791892	+	1	0	0	0
hsa-miR-424-5p	ENSG00000119979	FAM45A	protein_coding	chr10	120867533	120867556	120867533	120867556	+	0	1	0	0
hsa-miR-424-5p	ENSG00000151929	BAG3	protein_coding	chr10	121436893	121436898	121436893	121436898	+	1	0	0	0
hsa-miR-424-5p	ENSG00000120008	WDR11	protein_coding	chr10	122666212	122666233	122666212	122666233	+	0	1	0	0
hsa-miR-424-5p	ENSG00000107679	PLEKHA1	protein_coding	chr10	124191003	124191008	124190981	124191009	+	1	1	1	1
hsa-miR-424-5p	ENSG00000166033	HTRA1	protein_coding	chr10	124273945	124273950	124273945	124273950	+	1	0	0	0
hsa-miR-424-5p	ENSG00000154473	BUB3	protein_coding	chr10	124923774	124923779	124923774	124923779	+	1	0	0	0
hsa-miR-424-5p	ENSG00000165660	ABRAXAS2	protein_coding	chr10	126523696	126523701	126523696	126523701	+	1	0	0	0
hsa-miR-424-5p	ENSG00000019995	ZRANB1	protein_coding	chr10	126674424	126674430	126674403	126674431	+	1	0	0	0
hsa-miR-424-5p	ENSG00000019995	ZRANB1	protein_coding	chr10	126675183	126675189	126675162	126675190	+	1	1	0	0
hsa-miR-424-5p	ENSG00000107938	EDRF1	protein_coding	chr10	127431676	127431704	127431676	127431704	+	0	0	0	0
hsa-miR-424-5p	ENSG00000107938	EDRF1	protein_coding	chr10	127431796	127431824	127431796	127431824	+	0	0	0	0
hsa-miR-424-5p	ENSG00000107938	EDRF1	protein_coding	chr10	127442265	127442293	127442265	127442293	+	0	0	0	0
hsa-miR-424-5p	ENSG00000175470	PPP2R2D	protein_coding	chr10	133753651	133753679	133753651	133753679	+	0	0	0	0
hsa-miR-424-5p	ENSG00000175470	PPP2R2D	protein_coding	chr10	133769660	133769663	133769639	133769667	+	2	0	0	0
hsa-miR-424-5p	ENSG00000171813	PWWP2B	protein_coding	chr10	134230834	134230837	134230813	134230841	+	2	0	0	0
hsa-miR-424-5p	ENSG00000171813	PWWP2B	protein_coding	chr10	134231193	134231199	134231172	134231200	+	1	1	0	1
hsa-miR-424-5p	ENSG00000068383	INPP5A	protein_coding	chr10	134596082	134596087	134596082	134596087	+	1	0	0	0
hsa-miR-424-5p	ENSG00000068383	INPP5A	protein_coding	chr10	134596852	134596857	134596852	134596857	+	1	0	0	0
hsa-miR-424-5p	ENSG00000177951	BET1L	protein_coding	chr11	203190	203193	203187	203196	-	2	0	0	0
hsa-miR-424-5p	ENSG00000142089	IFITM3	protein_coding	chr11	319670	319676	319670	319676	-	0	0	0	0
hsa-miR-424-5p	ENSG00000023191	RNH1	protein_coding	chr11	494675	494678	494671	494702	-	0	1	0	0
hsa-miR-424-5p	ENSG00000023191	RNH1	protein_coding	chr11	498106	498134	498106	498134	-	0	0	0	0
hsa-miR-424-5p	ENSG00000023191	RNH1	protein_coding	chr11	498792	498820	498792	498820	-	0	0	0	0
hsa-miR-424-5p	ENSG00000023191	RNH1	protein_coding	chr11	499873	499901	499873	499901	-	0	0	0	0
hsa-miR-424-5p	ENSG00000174775	HRAS	protein_coding	chr11	532425	532430	532425	532430	-	1	0	0	0
hsa-miR-424-5p	ENSG00000177225	GATD1	protein_coding	chr11	770628	770633	770628	770633	-	1	0	0	0
hsa-miR-424-5p	ENSG00000177542	SLC25A22	protein_coding	chr11	790575	790575	790568	790602	-	3	1	0	3
hsa-miR-424-5p	ENSG00000177542	SLC25A22	protein_coding	chr11	790578	790583	790577	790605	-	1	0	0	0
hsa-miR-424-5p	ENSG00000177542	SLC25A22	protein_coding	chr11	791157	791162	791156	791184	-	1	0	0	0
hsa-miR-424-5p	ENSG00000177830	CHID1	protein_coding	chr11	868542	868545	868539	868548	-	2	0	0	0
hsa-miR-424-5p	ENSG00000177830	CHID1	protein_coding	chr11	869541	869546	869541	869546	-	1	0	0	0
hsa-miR-424-5p	ENSG00000078902	TOLLIP	protein_coding	chr11	1297361	1297366	1297361	1297366	-	1	0	0	0
hsa-miR-424-5p	ENSG00000078902	TOLLIP	protein_coding	chr11	1297956	1297961	1297956	1297961	-	1	0	0	0
hsa-miR-424-5p	ENSG00000167244	IGF2	protein_coding	chr11	2153602	2153607	2153602	2153607	-	1	0	0	0
hsa-miR-424-5p	ENSG00000284779	IGF2	protein_coding	chr11	2153602	2153607	2153602	2153607	-	1	0	0	0
hsa-miR-424-5p	ENSG00000110619	CARS	protein_coding	chr11	3022297	3022302	3022297	3022302	-	1	0	0	0
hsa-miR-424-5p	ENSG00000110713	NUP98	protein_coding	chr11	3733111	3733116	3733110	3733131	-	1	1	0	0
hsa-miR-424-5p	ENSG00000110713	NUP98	protein_coding	chr11	3733159	3733164	3733159	3733164	-	1	0	0	0
hsa-miR-424-5p	ENSG00000177105	RHOG	protein_coding	chr11	3848399	3848404	3848399	3848404	-	1	0	0	0
hsa-miR-424-5p	ENSG00000167333	TRIM68	protein_coding	chr11	4620414	4620419	4620414	4620419	-	1	0	0	0
hsa-miR-424-5p	ENSG00000130413	STK33	protein_coding	chr11	8413467	8413472	8413466	8413494	-	1	1	1	1
hsa-miR-424-5p	ENSG00000166436	TRIM66	protein_coding	chr11	8635519	8635524	8635518	8635546	-	0	0	0	0
hsa-miR-424-5p	ENSG00000166436	TRIM66	protein_coding	chr11	8635537	8635543	8635536	8635564	-	0	0	0	0
hsa-miR-424-5p	ENSG00000166436	TRIM66	protein_coding	chr11	8660293	8660321	8660293	8660321	-	0	0	0	0
hsa-miR-424-5p	ENSG00000166444	ST5	protein_coding	chr11	8715559	8715564	8715558	8715586	-	1	0	0	0
hsa-miR-424-5p	ENSG00000166444	ST5	protein_coding	chr11	8724154	8724182	8724154	8724182	-	0	0	0	0
hsa-miR-424-5p	ENSG00000166444	ST5	protein_coding	chr11	8737255	8737280	8737252	8737283	-	0	0	0	0
hsa-miR-424-5p	ENSG00000166444	ST5	protein_coding	chr11	8751582	8751610	8751582	8751610	-	0	0	0	0
hsa-miR-424-5p	ENSG00000166471	TMEM41B	protein_coding	chr11	9303209	9303230	9303209	9303230	-	0	1	0	0
hsa-miR-424-5p	ENSG00000133818	RRAS2	protein_coding	chr11	14300680	14300685	14300680	14300685	-	1	0	0	0
hsa-miR-424-5p	ENSG00000110693	SOX6	protein_coding	chr11	15988640	15988646	15988639	15988667	-	0	1	1	1
hsa-miR-424-5p	ENSG00000110693	SOX6	protein_coding	chr11	15988908	15988915	15988904	15988932	-	0	0	1	0
hsa-miR-424-5p	ENSG00000166689	PLEKHA7	protein_coding	chr11	16809449	16809454	16809449	16809454	-	1	0	0	0
hsa-miR-424-5p	ENSG00000011405	PIK3C2A	protein_coding	chr11	17110828	17110833	17110827	17110833	-	1	0	0	1
hsa-miR-424-5p	ENSG00000187486	KCNJ11	protein_coding	chr11	17408097	17408100	17408093	17408124	-	2	0	0	0
hsa-miR-424-5p	ENSG00000179119	SPTY2D1	protein_coding	chr11	18631372	18631377	18631372	18631377	-	1	0	0	0
hsa-miR-424-5p	ENSG00000179119	SPTY2D1	protein_coding	chr11	18631400	18631406	18631399	18631407	-	0	1	1	0
hsa-miR-424-5p	ENSG00000198168	SVIP	protein_coding	chr11	22842340	22842345	22842340	22842345	-	0	0	0	0
hsa-miR-424-5p	ENSG00000198168	SVIP	protein_coding	chr11	22842367	22842373	22842367	22842373	-	0	0	0	0
hsa-miR-424-5p	ENSG00000148943	LIN7C	protein_coding	chr11	27519828	27519833	27519828	27519833	-	1	0	0	0
hsa-miR-424-5p	ENSG00000176697	BDNF	protein_coding	chr11	27679062	27679068	27679061	27679087	-	1	1	1	1
hsa-miR-424-5p	ENSG00000110429	FBXO3	protein_coding	chr11	33767792	33767798	33767791	33767819	-	0	0	0	0
hsa-miR-424-5p	ENSG00000110429	FBXO3	protein_coding	chr11	33790469	33790497	33790469	33790497	-	0	0	0	0
hsa-miR-424-5p	ENSG00000166016	ABTB2	protein_coding	chr11	34172667	34172672	34172666	34172694	-	1	0	0	0
hsa-miR-424-5p	ENSG00000110436	SLC1A2	protein_coding	chr11	35338940	35338968	35338940	35338968	-	0	0	0	0
hsa-miR-424-5p	ENSG00000052850	ALX4	protein_coding	chr11	44283187	44283194	44283187	44283194	-	0	0	0	1
hsa-miR-424-5p	ENSG00000175274	TP53I11	protein_coding	chr11	44954581	44954586	44954581	44954586	-	1	0	0	0
hsa-miR-424-5p	ENSG00000175274	TP53I11	protein_coding	chr11	44954882	44954887	44954882	44954887	-	1	0	0	0
hsa-miR-424-5p	ENSG00000110497	AMBRA1	protein_coding	chr11	46418908	46418913	46418908	46418913	-	1	0	0	0
hsa-miR-424-5p	ENSG00000175220	ARHGAP1	protein_coding	chr11	46698862	46698867	46698862	46698867	-	1	0	0	0
hsa-miR-424-5p	ENSG00000175220	ARHGAP1	protein_coding	chr11	46698910	46698913	46698907	46698915	-	2	0	0	0
hsa-miR-424-5p	ENSG00000175216	CKAP5	protein_coding	chr11	46764659	46764665	46764658	46764686	-	0	0	0	0
hsa-miR-424-5p	ENSG00000175216	CKAP5	protein_coding	chr11	46765381	46765387	46765380	46765408	-	1	1	0	0
hsa-miR-424-5p	ENSG00000175216	CKAP5	protein_coding	chr11	46817146	46817174	46817146	46817174	-	0	0	0	0
hsa-miR-424-5p	ENSG00000175216	CKAP5	protein_coding	chr11	46817224	46817252	46817224	46817252	-	0	0	0	0
hsa-miR-424-5p	ENSG00000149182	ARFGAP2	protein_coding	chr11	47186760	47186763	47186756	47186787	-	2	1	1	1
hsa-miR-424-5p	ENSG00000165912	PACSIN3	protein_coding	chr11	47199377	47199382	47199377	47199382	-	1	0	0	0
hsa-miR-424-5p	ENSG00000134575	ACP2	protein_coding	chr11	47261598	47261602	47261594	47261622	-	2	1	0	0
hsa-miR-424-5p	ENSG00000134575	ACP2	protein_coding	chr11	47261742	47261770	47261742	47261770	-	0	0	0	0
hsa-miR-424-5p	ENSG00000149187	CELF1	protein_coding	chr11	47488147	47488152	47488146	47488174	-	0	0	0	0
hsa-miR-424-5p	ENSG00000149187	CELF1	protein_coding	chr11	47488481	47488486	47488480	47488508	-	0	0	0	0
hsa-miR-424-5p	ENSG00000149187	CELF1	protein_coding	chr11	47488718	47488746	47488718	47488746	-	0	0	0	0
hsa-miR-424-5p	ENSG00000149187	CELF1	protein_coding	chr11	47489291	47489296	47489291	47489296	-	0	0	0	0
hsa-miR-424-5p	ENSG00000149187	CELF1	protein_coding	chr11	47491117	47491122	47491116	47491144	-	0	0	0	0
hsa-miR-424-5p	ENSG00000149187	CELF1	protein_coding	chr11	47491251	47491256	47491250	47491278	-	0	0	0	0
hsa-miR-424-5p	ENSG00000149187	CELF1	protein_coding	chr11	47493140	47493146	47493139	47493167	-	0	1	0	0
hsa-miR-424-5p	ENSG00000149187	CELF1	protein_coding	chr11	47496903	47496931	47496903	47496931	-	0	0	0	0
hsa-miR-424-5p	ENSG00000149187	CELF1	protein_coding	chr11	47496963	47496988	47496960	47496991	-	0	0	0	0
hsa-miR-424-5p	ENSG00000123444	KBTBD4	protein_coding	chr11	47594307	47594310	47594303	47594334	-	2	1	1	0
hsa-miR-424-5p	ENSG00000123444	KBTBD4	protein_coding	chr11	47594509	47594537	47594509	47594537	-	0	0	0	0
hsa-miR-424-5p	ENSG00000109919	MTCH2	protein_coding	chr11	47639134	47639139	47639133	47639156	-	1	1	0	0
hsa-miR-424-5p	ENSG00000030066	NUP160	protein_coding	chr11	47800430	47800435	47800429	47800450	-	1	1	0	0
hsa-miR-424-5p	ENSG00000149136	SSRP1	protein_coding	chr11	57093598	57093601	57093594	57093625	-	2	1	0	0
hsa-miR-424-5p	ENSG00000149136	SSRP1	protein_coding	chr11	57093704	57093710	57093703	57093731	-	1	0	0	0
hsa-miR-424-5p	ENSG00000149150	SLC43A1	protein_coding	chr11	57252047	57252050	57252044	57252067	-	2	1	0	2
hsa-miR-424-5p	ENSG00000167987	VPS37C	protein_coding	chr11	60897963	60897968	60897963	60897968	-	1	0	0	0
hsa-miR-424-5p	ENSG00000167987	VPS37C	protein_coding	chr11	60898038	60898043	60898037	60898043	-	1	0	1	1
hsa-miR-424-5p	ENSG00000162144	CYB561A3	protein_coding	chr11	61116256	61116261	61116256	61116261	-	0	0	0	0
hsa-miR-424-5p	ENSG00000162144	CYB561A3	protein_coding	chr11	61116620	61116623	61116616	61116637	-	2	1	0	0
hsa-miR-424-5p	ENSG00000162144	CYB561A3	protein_coding	chr11	61116730	61116735	61116730	61116735	-	1	0	0	0
hsa-miR-424-5p	ENSG00000162144	CYB561A3	protein_coding	chr11	61117111	61117114	61117107	61117128	-	2	1	0	0
hsa-miR-424-5p	ENSG00000162144	CYB561A3	protein_coding	chr11	61117160	61117166	61117159	61117187	-	1	1	0	0
hsa-miR-424-5p	ENSG00000162144	CYB561A3	protein_coding	chr11	61117473	61117479	61117472	61117500	-	1	0	0	0
hsa-miR-424-5p	ENSG00000162144	CYB561A3	protein_coding	chr11	61117583	61117588	61117583	61117588	-	1	0	0	0
hsa-miR-424-5p	ENSG00000162144	CYB561A3	protein_coding	chr11	61118530	61118535	61118529	61118557	-	0	0	0	0
hsa-miR-424-5p	ENSG00000162144	CYB561A3	protein_coding	chr11	61124147	61124175	61124147	61124175	-	0	0	0	0
hsa-miR-424-5p	ENSG00000149532	CPSF7	protein_coding	chr11	61170863	61170869	61170862	61170890	-	1	1	0	0
hsa-miR-424-5p	ENSG00000149532	CPSF7	protein_coding	chr11	61171418	61171424	61171417	61171445	-	1	0	1	0
hsa-miR-424-5p	ENSG00000149532	CPSF7	protein_coding	chr11	61171456	61171462	61171455	61171483	-	1	1	1	0
hsa-miR-424-5p	ENSG00000134825	TMEM258	protein_coding	chr11	61556626	61556632	61556625	61556653	-	1	1	0	0
hsa-miR-424-5p	ENSG00000134825	TMEM258	protein_coding	chr11	61557288	61557316	61557288	61557316	-	0	0	0	0
hsa-miR-424-5p	ENSG00000149485	FADS1	protein_coding	chr11	61569129	61569134	61569129	61569134	-	1	0	0	0
hsa-miR-424-5p	ENSG00000149485	FADS1	protein_coding	chr11	61571296	61571315	61571296	61571315	-	0	0	0	0
hsa-miR-424-5p	ENSG00000149016	TUT1	protein_coding	chr11	62342533	62342539	62342533	62342539	-	0	0	1	0
hsa-miR-424-5p	ENSG00000149541	B3GAT3	protein_coding	chr11	62384702	62384730	62384702	62384730	-	0	0	0	0
hsa-miR-424-5p	ENSG00000162236	STX5	protein_coding	chr11	62574435	62574458	62574435	62574458	-	0	1	0	0
hsa-miR-424-5p	ENSG00000173113	TRMT112	protein_coding	chr11	64084358	64084364	64084357	64084385	-	0	0	0	1
hsa-miR-424-5p	ENSG00000173113	TRMT112	protein_coding	chr11	64084534	64084540	64084533	64084561	-	0	0	0	1
hsa-miR-424-5p	ENSG00000110076	NRXN2	protein_coding	chr11	64373939	64373944	64373939	64373944	-	1	0	0	0
hsa-miR-424-5p	ENSG00000168067	MAP4K2	protein_coding	chr11	64556799	64556804	64556798	64556826	-	1	0	0	0
hsa-miR-424-5p	ENSG00000168067	MAP4K2	protein_coding	chr11	64559647	64559675	64559647	64559675	-	0	0	0	0
hsa-miR-424-5p	ENSG00000168067	MAP4K2	protein_coding	chr11	64559850	64559878	64559850	64559878	-	0	0	0	0
hsa-miR-424-5p	ENSG00000168067	MAP4K2	protein_coding	chr11	64563975	64564003	64563975	64564003	-	0	0	0	0
hsa-miR-424-5p	ENSG00000168067	MAP4K2	protein_coding	chr11	64564308	64564336	64564308	64564336	-	0	0	0	0
hsa-miR-424-5p	ENSG00000110047	EHD1	protein_coding	chr11	64620386	64620391	64620386	64620391	-	1	0	0	0
hsa-miR-424-5p	ENSG00000110047	EHD1	protein_coding	chr11	64621426	64621431	64621426	64621431	-	1	0	0	0
hsa-miR-424-5p	ENSG00000146670	CDCA5	protein_coding	chr11	64845854	64845859	64845854	64845859	-	1	0	0	0
hsa-miR-424-5p	ENSG00000162298	SYVN1	protein_coding	chr11	64896122	64896143	64896122	64896143	-	0	0	0	0
hsa-miR-424-5p	ENSG00000168056	LTBP3	protein_coding	chr11	65306662	65306690	65306662	65306690	-	0	0	0	0
hsa-miR-424-5p	ENSG00000168056	LTBP3	protein_coding	chr11	65307247	65307275	65307247	65307275	-	0	0	0	0
hsa-miR-424-5p	ENSG00000168056	LTBP3	protein_coding	chr11	65308659	65308684	65308656	65308687	-	0	0	0	0
hsa-miR-424-5p	ENSG00000168056	LTBP3	protein_coding	chr11	65319775	65319803	65319775	65319803	-	0	0	0	0
hsa-miR-424-5p	ENSG00000168056	LTBP3	protein_coding	chr11	65321197	65321225	65321197	65321225	-	0	0	0	0
hsa-miR-424-5p	ENSG00000168056	LTBP3	protein_coding	chr11	65325347	65325354	65325326	65325375	-	0	0	0	0
hsa-miR-424-5p	ENSG00000254470	AP5B1	protein_coding	chr11	65545438	65545466	65545438	65545466	-	0	0	0	0
hsa-miR-424-5p	ENSG00000254470	AP5B1	protein_coding	chr11	65546785	65546813	65546785	65546813	-	0	0	0	0
hsa-miR-424-5p	ENSG00000254470	AP5B1	protein_coding	chr11	65546920	65546948	65546920	65546948	-	0	0	0	0
hsa-miR-424-5p	ENSG00000254470	AP5B1	protein_coding	chr11	65547670	65547698	65547670	65547698	-	0	0	0	0
hsa-miR-424-5p	ENSG00000175592	FOSL1	protein_coding	chr11	65659760	65659765	65659759	65659765	-	1	0	1	1
hsa-miR-424-5p	ENSG00000175573	C11orf68	protein_coding	chr11	65684685	65684691	65684684	65684705	-	1	1	1	1
hsa-miR-424-5p	ENSG00000175376	EIF1AD	protein_coding	chr11	65765319	65765324	65765319	65765324	-	1	0	0	0
hsa-miR-424-5p	ENSG00000174744	BRMS1	protein_coding	chr11	66105119	66105124	66105119	66105124	-	1	0	0	0
hsa-miR-424-5p	ENSG00000174744	BRMS1	protein_coding	chr11	66105222	66105228	66105222	66105228	-	1	0	0	0
hsa-miR-424-5p	ENSG00000174669	SLC29A2	protein_coding	chr11	66130758	66130763	66130757	66130785	-	1	0	0	0
hsa-miR-424-5p	ENSG00000174669	SLC29A2	protein_coding	chr11	66130910	66130938	66130910	66130938	-	0	0	0	0
hsa-miR-424-5p	ENSG00000174669	SLC29A2	protein_coding	chr11	66131749	66131777	66131749	66131777	-	0	0	0	0
hsa-miR-424-5p	ENSG00000174669	SLC29A2	protein_coding	chr11	66133465	66133493	66133465	66133493	-	0	0	0	0
hsa-miR-424-5p	ENSG00000174669	SLC29A2	protein_coding	chr11	66136872	66136900	66136872	66136900	-	0	0	0	0
hsa-miR-424-5p	ENSG00000174547	MRPL11	protein_coding	chr11	66203526	66203531	66203526	66203531	-	1	0	0	0
hsa-miR-424-5p	ENSG00000174165	ZDHHC24	protein_coding	chr11	66306784	66306789	66306784	66306789	-	1	0	0	0
hsa-miR-424-5p	ENSG00000173914	RBM4B	protein_coding	chr11	66436687	66436693	66436687	66436693	-	0	0	0	1
hsa-miR-424-5p	ENSG00000173898	SPTBN2	protein_coding	chr11	66452806	66452811	66452805	66452833	-	1	0	0	0
hsa-miR-424-5p	ENSG00000173898	SPTBN2	protein_coding	chr11	66453242	66453247	66453241	66453269	-	1	1	1	1
hsa-miR-424-5p	ENSG00000173898	SPTBN2	protein_coding	chr11	66457608	66457636	66457608	66457636	-	0	0	0	0
hsa-miR-424-5p	ENSG00000173599	PC	protein_coding	chr11	66616172	66616177	66616172	66616177	-	1	0	0	0
hsa-miR-424-5p	ENSG00000172531	PPP1CA	protein_coding	chr11	67165824	67165829	67165824	67165829	-	1	0	0	0
hsa-miR-424-5p	ENSG00000172663	TMEM134	protein_coding	chr11	67231872	67231877	67231872	67231877	-	1	0	0	0
hsa-miR-424-5p	ENSG00000167799	NUDT8	protein_coding	chr11	67395550	67395555	67395550	67395555	-	1	0	0	0
hsa-miR-424-5p	ENSG00000132746	ALDH3B2	protein_coding	chr11	67429763	67429768	67429763	67429768	-	1	0	0	0
hsa-miR-424-5p	ENSG00000132746	ALDH3B2	protein_coding	chr11	67430494	67430499	67430494	67430499	-	1	0	0	0
hsa-miR-424-5p	ENSG00000110721	CHKA	protein_coding	chr11	67820670	67820675	67820670	67820675	-	1	0	0	0
hsa-miR-424-5p	ENSG00000110721	CHKA	protein_coding	chr11	67820922	67820927	67820922	67820927	-	1	0	0	0
hsa-miR-424-5p	ENSG00000110066	KMT5B	protein_coding	chr11	67933338	67933344	67933337	67933357	-	1	1	0	0
hsa-miR-424-5p	ENSG00000171067	C11orf24	protein_coding	chr11	68028940	68028946	68028939	68028967	-	1	1	0	1
hsa-miR-424-5p	ENSG00000132749	TESMIN	protein_coding	chr11	68504721	68504727	68504721	68504727	-	1	0	0	0
hsa-miR-424-5p	ENSG00000054965	FAM168A	protein_coding	chr11	73117623	73117628	73117622	73117650	-	1	1	0	0
hsa-miR-424-5p	ENSG00000175567	UCP2	protein_coding	chr11	73686037	73686043	73686036	73686051	-	0	1	0	1
hsa-miR-424-5p	ENSG00000165434	PGM2L1	protein_coding	chr11	74042926	74042932	74042926	74042933	-	1	0	0	0
hsa-miR-424-5p	ENSG00000165434	PGM2L1	protein_coding	chr11	74043719	74043721	74043715	74043724	-	2	0	1	1
hsa-miR-424-5p	ENSG00000166435	XRRA1	protein_coding	chr11	74552864	74552870	74552863	74552883	-	1	1	0	0
hsa-miR-424-5p	ENSG00000048649	RSF1	protein_coding	chr11	77374999	77375004	77374999	77375004	-	0	0	0	0
hsa-miR-424-5p	ENSG00000048649	RSF1	protein_coding	chr11	77375226	77375232	77375226	77375232	-	0	0	0	0
hsa-miR-424-5p	ENSG00000048649	RSF1	protein_coding	chr11	77376341	77376347	77376341	77376347	-	0	0	0	1
hsa-miR-424-5p	ENSG00000149262	INTS4	protein_coding	chr11	77632484	77632512	77632484	77632512	-	0	0	0	0
hsa-miR-424-5p	ENSG00000151364	KCTD14	protein_coding	chr11	77726815	77726820	77726815	77726820	-	1	0	0	0
hsa-miR-424-5p	ENSG00000033327	GAB2	protein_coding	chr11	77929650	77929655	77929650	77929655	-	1	0	0	0
hsa-miR-424-5p	ENSG00000137502	RAB30	protein_coding	chr11	82684861	82684867	82684860	82684888	-	0	0	0	1
hsa-miR-424-5p	ENSG00000137502	RAB30	protein_coding	chr11	82691628	82691634	82691627	82691655	-	0	0	0	0
hsa-miR-424-5p	ENSG00000137502	RAB30	protein_coding	chr11	82691761	82691767	82691760	82691788	-	0	0	0	0
hsa-miR-424-5p	ENSG00000137504	CREBZF	protein_coding	chr11	85372433	85372438	85372433	85372438	-	1	0	0	0
hsa-miR-424-5p	ENSG00000137504	CREBZF	protein_coding	chr11	85374526	85374532	85374526	85374532	-	1	0	0	0
hsa-miR-424-5p	ENSG00000137501	SYTL2	protein_coding	chr11	85405980	85405983	85405977	85406002	-	2	1	0	2
hsa-miR-424-5p	ENSG00000174804	FZD4	protein_coding	chr11	86657203	86657208	86657202	86657230	-	1	0	0	0
hsa-miR-424-5p	ENSG00000174804	FZD4	protein_coding	chr11	86666041	86666069	86666041	86666069	-	0	0	0	0
hsa-miR-424-5p	ENSG00000110172	CHORDC1	protein_coding	chr11	89935501	89935507	89935500	89935528	-	1	1	1	1
hsa-miR-424-5p	ENSG00000150316	CWC15	protein_coding	chr11	94696243	94696249	94696242	94696266	-	1	1	0	0
hsa-miR-424-5p	ENSG00000149212	SESN3	protein_coding	chr11	94905582	94905603	94905582	94905603	-	0	0	0	0
hsa-miR-424-5p	ENSG00000152558	TMEM123	protein_coding	chr11	102268688	102268693	102268688	102268693	-	1	0	0	0
hsa-miR-424-5p	ENSG00000149968	MMP3	protein_coding	chr11	102706664	102706667	102706660	102706681	-	2	1	0	0
hsa-miR-424-5p	ENSG00000137757	CASP5	protein_coding	chr11	104871080	104871086	104871079	104871107	-	0	0	0	0
hsa-miR-424-5p	ENSG00000178202	KDELC2	protein_coding	chr11	108344753	108344758	108344753	108344758	-	1	0	0	0
hsa-miR-424-5p	ENSG00000110777	POU2AF1	protein_coding	chr11	111223964	111223970	111223963	111223985	-	1	1	0	0
hsa-miR-424-5p	ENSG00000137713	PPP2R1B	protein_coding	chr11	111611669	111611675	111611668	111611696	-	1	1	0	1
hsa-miR-424-5p	ENSG00000137713	PPP2R1B	protein_coding	chr11	111630623	111630648	111630620	111630651	-	0	0	0	0
hsa-miR-424-5p	ENSG00000182985	CADM1	protein_coding	chr11	115046566	115046572	115046565	115046593	-	1	1	1	1
hsa-miR-424-5p	ENSG00000109917	ZPR1	protein_coding	chr11	116649605	116649610	116649605	116649610	-	1	0	0	0
hsa-miR-424-5p	ENSG00000160584	SIK3	protein_coding	chr11	116716236	116716241	116716236	116716241	-	1	0	0	0
hsa-miR-424-5p	ENSG00000186318	BACE1	protein_coding	chr11	117157695	117157700	117157694	117157722	-	1	0	0	0
hsa-miR-424-5p	ENSG00000186318	BACE1	protein_coding	chr11	117158480	117158486	117158479	117158507	-	1	0	0	1
hsa-miR-424-5p	ENSG00000186318	BACE1	protein_coding	chr11	117158658	117158663	117158657	117158685	-	1	0	0	0
hsa-miR-424-5p	ENSG00000186318	BACE1	protein_coding	chr11	117160009	117160015	117160008	117160036	-	1	0	1	1
hsa-miR-424-5p	ENSG00000137747	TMPRSS13	protein_coding	chr11	117772320	117772325	117772319	117772347	-	1	0	0	0
hsa-miR-424-5p	ENSG00000160588	MPZL3	protein_coding	chr11	118097943	118097948	118097942	118097970	-	0	0	0	0
hsa-miR-424-5p	ENSG00000160588	MPZL3	protein_coding	chr11	118098241	118098246	118098240	118098268	-	0	0	0	0
hsa-miR-424-5p	ENSG00000160588	MPZL3	protein_coding	chr11	118106222	118106250	118106222	118106250	-	0	0	0	0
hsa-miR-424-5p	ENSG00000110367	DDX6	protein_coding	chr11	118621155	118621160	118621155	118621160	-	1	0	0	0
hsa-miR-424-5p	ENSG00000186174	BCL9L	protein_coding	chr11	118768109	118768111	118768105	118768136	-	2	0	1	1
hsa-miR-424-5p	ENSG00000186174	BCL9L	protein_coding	chr11	118768214	118768217	118768210	118768238	-	1	0	2	1
hsa-miR-424-5p	ENSG00000186174	BCL9L	protein_coding	chr11	118773186	118773214	118773186	118773214	-	0	0	0	0
hsa-miR-424-5p	ENSG00000172269	DPAGT1	protein_coding	chr11	118967858	118967881	118967855	118967886	-	0	1	0	0
hsa-miR-424-5p	ENSG00000172269	DPAGT1	protein_coding	chr11	118971087	118971115	118971087	118971115	-	0	0	0	0
hsa-miR-424-5p	ENSG00000172269	DPAGT1	protein_coding	chr11	118971455	118971480	118971452	118971483	-	0	0	0	0
hsa-miR-424-5p	ENSG00000223953	C1QTNF5	protein_coding	chr11	119209899	119209905	119209899	119209905	-	1	0	0	0
hsa-miR-424-5p	ENSG00000235718	MFRP	protein_coding	chr11	119209899	119209905	119209899	119209905	-	1	0	0	0
hsa-miR-424-5p	ENSG00000223953	C1QTNF5	protein_coding	chr11	119211082	119211088	119211082	119211088	-	0	0	0	1
hsa-miR-424-5p	ENSG00000235718	MFRP	protein_coding	chr11	119211082	119211088	119211082	119211088	-	0	0	0	1
hsa-miR-424-5p	ENSG00000036672	USP2	protein_coding	chr11	119227059	119227064	119227058	119227064	-	1	0	1	0
hsa-miR-424-5p	ENSG00000154096	THY1	protein_coding	chr11	119289883	119289888	119289882	119289910	-	1	0	0	0
hsa-miR-424-5p	ENSG00000154096	THY1	protein_coding	chr11	119290169	119290189	119290166	119290197	-	0	0	0	0
hsa-miR-424-5p	ENSG00000110400	NECTIN1	protein_coding	chr11	119533461	119533466	119533460	119533488	-	1	0	0	0
hsa-miR-424-5p	ENSG00000110400	NECTIN1	protein_coding	chr11	119533720	119533722	119533716	119533744	-	1	0	2	1
hsa-miR-424-5p	ENSG00000110400	NECTIN1	protein_coding	chr11	119535007	119535013	119535006	119535034	-	1	0	1	1
hsa-miR-424-5p	ENSG00000137699	TRIM29	protein_coding	chr11	119983063	119983091	119983063	119983091	-	0	0	0	0
hsa-miR-424-5p	ENSG00000109971	HSPA8	protein_coding	chr11	122928341	122928346	122928341	122928346	-	1	0	0	0
hsa-miR-424-5p	ENSG00000109971	HSPA8	protein_coding	chr11	122930850	122930875	122930847	122930878	-	0	0	0	0
hsa-miR-424-5p	ENSG00000166261	ZNF202	protein_coding	chr11	123596068	123596073	123596068	123596073	-	1	0	0	0
hsa-miR-424-5p	ENSG00000166261	ZNF202	protein_coding	chr11	123596092	123596097	123596092	123596097	-	1	0	0	0
hsa-miR-424-5p	ENSG00000165526	RPUSD4	protein_coding	chr11	126073137	126073142	126073137	126073142	-	1	0	0	0
hsa-miR-424-5p	ENSG00000182934	SRPRA	protein_coding	chr11	126133300	126133305	126133299	126133327	-	1	1	1	1
hsa-miR-424-5p	ENSG00000182934	SRPRA	protein_coding	chr11	126134881	126134909	126134881	126134909	-	0	0	0	0
hsa-miR-424-5p	ENSG00000182934	SRPRA	protein_coding	chr11	126138586	126138614	126138586	126138614	-	0	0	0	0
hsa-miR-424-5p	ENSG00000134954	ETS1	protein_coding	chr11	128330125	128330130	128330125	128330130	-	1	0	0	0
hsa-miR-424-5p	ENSG00000134909	ARHGAP32	protein_coding	chr11	128836659	128836664	128836659	128836664	-	0	0	0	0
hsa-miR-424-5p	ENSG00000134909	ARHGAP32	protein_coding	chr11	128837151	128837156	128837150	128837168	-	0	1	1	1
hsa-miR-424-5p	ENSG00000134909	ARHGAP32	protein_coding	chr11	128837229	128837235	128837229	128837235	-	0	0	1	0
hsa-miR-424-5p	ENSG00000134909	ARHGAP32	protein_coding	chr11	128839867	128839872	128839867	128839872	-	0	0	0	0
hsa-miR-424-5p	ENSG00000134909	ARHGAP32	protein_coding	chr11	128840962	128840962	128840956	128840968	-	0	0	0	0
hsa-miR-424-5p	ENSG00000134909	ARHGAP32	protein_coding	chr11	128842480	128842486	128842480	128842486	-	0	0	0	0
hsa-miR-424-5p	ENSG00000170325	PRDM10	protein_coding	chr11	129771474	129771479	129771474	129771479	-	1	0	0	0
hsa-miR-424-5p	ENSG00000196323	ZBTB44	protein_coding	chr11	130097616	130097621	130097615	130097643	-	0	1	1	1
hsa-miR-424-5p	ENSG00000196323	ZBTB44	protein_coding	chr11	130102374	130102379	130102373	130102401	-	0	0	1	1
hsa-miR-424-5p	ENSG00000120451	SNX19	protein_coding	chr11	130747684	130747689	130747684	130747689	-	1	0	0	0
hsa-miR-424-5p	ENSG00000151503	NCAPD3	protein_coding	chr11	134093181	134093187	134093181	134093187	-	0	0	0	0
hsa-miR-424-5p	ENSG00000177963	RIC8A	protein_coding	chr11	214386	214389	214375	214393	+	1	1	2	1
hsa-miR-424-5p	ENSG00000185627	PSMD13	protein_coding	chr11	252669	252674	252669	252674	+	1	0	0	0
hsa-miR-424-5p	ENSG00000184363	PKP3	protein_coding	chr11	404632	404637	404632	404637	+	1	0	0	0
hsa-miR-424-5p	ENSG00000184363	PKP3	protein_coding	chr11	404792	404797	404792	404797	+	1	0	0	0
hsa-miR-424-5p	ENSG00000070047	PHRF1	protein_coding	chr11	612168	612173	612168	612173	+	1	0	0	0
hsa-miR-424-5p	ENSG00000177106	EPS8L2	protein_coding	chr11	727196	727202	727175	727203	+	1	0	0	0
hsa-miR-424-5p	ENSG00000177697	CD151	protein_coding	chr11	836128	836149	836128	836149	+	0	1	0	0
hsa-miR-424-5p	ENSG00000177697	CD151	protein_coding	chr11	838211	838214	838207	838217	+	2	0	0	0
hsa-miR-424-5p	ENSG00000183020	AP2A2	protein_coding	chr11	1012147	1012152	1012147	1012152	+	1	0	0	0
hsa-miR-424-5p	ENSG00000167323	STIM1	protein_coding	chr11	4113255	4113258	4113234	4113262	+	2	1	0	0
hsa-miR-424-5p	ENSG00000167325	RRM1	protein_coding	chr11	4127323	4127351	4127323	4127351	+	0	0	0	0
hsa-miR-424-5p	ENSG00000166311	SMPD1	protein_coding	chr11	6415897	6415903	6415876	6415904	+	1	1	0	0
hsa-miR-424-5p	ENSG00000166311	SMPD1	protein_coding	chr11	6416057	6416062	6416035	6416063	+	1	0	0	0
hsa-miR-424-5p	ENSG00000166311	SMPD1	protein_coding	chr11	6416168	6416174	6416147	6416175	+	1	1	0	1
hsa-miR-424-5p	ENSG00000132286	TIMM10B	protein_coding	chr11	6503391	6503419	6503391	6503419	+	0	0	0	0
hsa-miR-424-5p	ENSG00000283977	AC084337.2	protein_coding	chr11	6503391	6503419	6503391	6503419	+	0	0	0	0
hsa-miR-424-5p	ENSG00000132286	TIMM10B	protein_coding	chr11	6505678	6505683	6505656	6505684	+	1	0	0	0
hsa-miR-424-5p	ENSG00000132286	TIMM10B	protein_coding	chr11	6505840	6505846	6505819	6505847	+	1	0	0	0
hsa-miR-424-5p	ENSG00000179532	DNHD1	protein_coding	chr11	6560491	6560504	6560476	6560519	+	0	0	0	0
hsa-miR-424-5p	ENSG00000183801	OLFML1	protein_coding	chr11	7530959	7530965	7530959	7530965	+	0	0	0	0
hsa-miR-424-5p	ENSG00000166387	PPFIBP2	protein_coding	chr11	7614368	7614390	7614368	7614390	+	0	1	0	0
hsa-miR-424-5p	ENSG00000166402	TUB	protein_coding	chr11	8125660	8125665	8125660	8125665	+	1	0	0	0
hsa-miR-424-5p	ENSG00000205339	IPO7	protein_coding	chr11	9467560	9467565	9467538	9467566	+	0	1	1	1
hsa-miR-424-5p	ENSG00000205339	IPO7	protein_coding	chr11	9469476	9469482	9469455	9469483	+	0	1	0	0
hsa-miR-424-5p	ENSG00000166483	WEE1	protein_coding	chr11	9608031	9608059	9608031	9608059	+	0	0	0	0
hsa-miR-424-5p	ENSG00000166483	WEE1	protein_coding	chr11	9610414	9610420	9610393	9610421	+	1	1	1	1
hsa-miR-424-5p	ENSG00000166483	WEE1	protein_coding	chr11	9610694	9610699	9610672	9610700	+	1	1	1	1
hsa-miR-424-5p	ENSG00000166483	WEE1	protein_coding	chr11	9610792	9610797	9610770	9610798	+	1	1	0	0
hsa-miR-424-5p	ENSG00000133789	SWAP70	protein_coding	chr11	9771928	9771934	9771907	9771935	+	1	1	0	1
hsa-miR-424-5p	ENSG00000187079	TEAD1	protein_coding	chr11	12962615	12962643	12962615	12962643	+	0	0	0	0
hsa-miR-424-5p	ENSG00000187079	TEAD1	protein_coding	chr11	12962749	12962755	12962728	12962756	+	1	0	0	0
hsa-miR-424-5p	ENSG00000187079	TEAD1	protein_coding	chr11	12963931	12963937	12963910	12963938	+	1	0	0	0
hsa-miR-424-5p	ENSG00000187079	TEAD1	protein_coding	chr11	12965712	12965718	12965691	12965719	+	1	0	0	1
hsa-miR-424-5p	ENSG00000152270	PDE3B	protein_coding	chr11	14665875	14665903	14665875	14665903	+	0	0	0	0
hsa-miR-424-5p	ENSG00000152270	PDE3B	protein_coding	chr11	14666217	14666218	14666190	14666245	+	0	0	0	0
hsa-miR-424-5p	ENSG00000152270	PDE3B	protein_coding	chr11	14666265	14666293	14666265	14666293	+	0	0	0	0
hsa-miR-424-5p	ENSG00000152270	PDE3B	protein_coding	chr11	14889156	14889184	14889156	14889184	+	0	0	0	0
hsa-miR-424-5p	ENSG00000152270	PDE3B	protein_coding	chr11	14891492	14891498	14891471	14891499	+	1	1	0	1
hsa-miR-424-5p	ENSG00000188211	NCR3LG1	protein_coding	chr11	17388851	17388879	17388851	17388879	+	0	0	0	0
hsa-miR-424-5p	ENSG00000188211	NCR3LG1	protein_coding	chr11	17396706	17396734	17396706	17396734	+	0	0	0	0
hsa-miR-424-5p	ENSG00000110768	GTF2H1	protein_coding	chr11	18387759	18387764	18387744	18387765	+	1	1	0	0
hsa-miR-424-5p	ENSG00000134333	LDHA	protein_coding	chr11	18429424	18429443	18429424	18429443	+	0	1	0	0
hsa-miR-424-5p	ENSG00000151117	TMEM86A	protein_coding	chr11	18724431	18724436	18724431	18724436	+	1	0	0	0
hsa-miR-424-5p	ENSG00000185238	PRMT3	protein_coding	chr11	20429480	20429508	20429480	20429508	+	0	0	0	0
hsa-miR-424-5p	ENSG00000134343	ANO3	protein_coding	chr11	26684508	26684514	26684487	26684515	+	1	1	1	1
hsa-miR-424-5p	ENSG00000152219	ARL14EP	protein_coding	chr11	30359079	30359085	30359063	30359086	+	1	1	0	0
hsa-miR-424-5p	ENSG00000149100	EIF3M	protein_coding	chr11	32625066	32625073	32625066	32625073	+	0	0	0	1
hsa-miR-424-5p	ENSG00000060749	QSER1	protein_coding	chr11	33000954	33000959	33000954	33000959	+	1	0	0	0
hsa-miR-424-5p	ENSG00000110422	HIPK3	protein_coding	chr11	33376634	33376640	33376634	33376640	+	0	0	0	1
hsa-miR-424-5p	ENSG00000135387	CAPRIN1	protein_coding	chr11	34121912	34121918	34121891	34121919	+	1	1	0	1
hsa-miR-424-5p	ENSG00000135387	CAPRIN1	protein_coding	chr11	34122378	34122384	34122357	34122385	+	1	1	0	1
hsa-miR-424-5p	ENSG00000135372	NAT10	protein_coding	chr11	34168138	34168141	34168136	34168144	+	2	0	0	0
hsa-miR-424-5p	ENSG00000026508	CD44	protein_coding	chr11	35252347	35252352	35252347	35252352	+	1	0	0	0
hsa-miR-424-5p	ENSG00000166326	TRIM44	protein_coding	chr11	35828022	35828027	35828022	35828027	+	1	0	0	0
hsa-miR-424-5p	ENSG00000166326	TRIM44	protein_coding	chr11	35828213	35828218	35828213	35828218	+	1	0	0	0
hsa-miR-424-5p	ENSG00000166181	API5	protein_coding	chr11	43364518	43364523	43364518	43364523	+	1	0	0	0
hsa-miR-424-5p	ENSG00000052841	TTC17	protein_coding	chr11	43515962	43515968	43515962	43515968	+	0	0	0	0
hsa-miR-424-5p	ENSG00000151348	EXT2	protein_coding	chr11	44266906	44266912	44266885	44266913	+	1	1	0	0
hsa-miR-424-5p	ENSG00000157570	TSPAN18	protein_coding	chr11	44951267	44951272	44951267	44951272	+	1	0	0	0
hsa-miR-424-5p	ENSG00000157570	TSPAN18	protein_coding	chr11	44951425	44951430	44951425	44951430	+	1	0	0	0
hsa-miR-424-5p	ENSG00000019485	PRDM11	protein_coding	chr11	45234991	45234997	45234991	45234997	+	0	0	0	0
hsa-miR-424-5p	ENSG00000019485	PRDM11	protein_coding	chr11	45251643	45251649	45251643	45251649	+	0	0	1	0
hsa-miR-424-5p	ENSG00000181830	SLC35C1	protein_coding	chr11	45834513	45834518	45834513	45834518	+	1	0	0	0
hsa-miR-424-5p	ENSG00000121671	CRY2	protein_coding	chr11	45904403	45904409	45904403	45904409	+	1	0	0	0
hsa-miR-424-5p	ENSG00000165905	LARGE2	protein_coding	chr11	45950536	45950542	45950515	45950543	+	1	1	0	1
hsa-miR-424-5p	ENSG00000157613	CREB3L1	protein_coding	chr11	46342804	46342810	46342783	46342811	+	1	1	0	0
hsa-miR-424-5p	ENSG00000157613	CREB3L1	protein_coding	chr11	46342859	46342865	46342838	46342866	+	1	0	0	0
hsa-miR-424-5p	ENSG00000175224	ATG13	protein_coding	chr11	46671756	46671784	46671756	46671784	+	0	0	0	0
hsa-miR-424-5p	ENSG00000175224	ATG13	protein_coding	chr11	46693952	46693957	46693930	46693958	+	1	0	0	0
hsa-miR-424-5p	ENSG00000175224	ATG13	protein_coding	chr11	46694645	46694651	46694624	46694652	+	1	1	0	1
hsa-miR-424-5p	ENSG00000175224	ATG13	protein_coding	chr11	46694811	46694814	46694787	46694818	+	2	0	0	1
hsa-miR-424-5p	ENSG00000149179	C11orf49	protein_coding	chr11	47183291	47183297	47183270	47183298	+	1	0	0	0
hsa-miR-424-5p	ENSG00000110514	MADD	protein_coding	chr11	47331129	47331157	47331129	47331157	+	0	0	0	0
hsa-miR-424-5p	ENSG00000110514	MADD	protein_coding	chr11	47350772	47350778	47350751	47350779	+	1	1	0	0
hsa-miR-424-5p	ENSG00000110514	MADD	protein_coding	chr11	47351377	47351382	47351377	47351382	+	1	0	0	0
hsa-miR-424-5p	ENSG00000149177	PTPRJ	protein_coding	chr11	48190236	48190242	48190222	48190243	+	1	1	1	1
hsa-miR-424-5p	ENSG00000149131	SERPING1	protein_coding	chr11	57382117	57382123	57382117	57382123	+	1	0	0	0
hsa-miR-424-5p	ENSG00000198561	CTNND1	protein_coding	chr11	57584479	57584485	57584458	57584486	+	1	1	0	0
hsa-miR-424-5p	ENSG00000198561	CTNND1	protein_coding	chr11	57585293	57585298	57585271	57585299	+	1	0	0	0
hsa-miR-424-5p	ENSG00000198561	CTNND1	protein_coding	chr11	57586642	57586647	57586620	57586648	+	1	0	0	0
hsa-miR-424-5p	ENSG00000166801	FAM111A	protein_coding	chr11	58922455	58922460	58922455	58922460	+	1	0	0	0
hsa-miR-424-5p	ENSG00000166900	STX3	protein_coding	chr11	59569056	59569061	59569056	59569061	+	1	0	0	0
hsa-miR-424-5p	ENSG00000166927	MS4A7	protein_coding	chr11	60162506	60162512	60162494	60162513	+	1	1	0	0
hsa-miR-424-5p	ENSG00000110104	CCDC86	protein_coding	chr11	60617860	60617865	60617860	60617865	+	1	0	0	0
hsa-miR-424-5p	ENSG00000110104	CCDC86	protein_coding	chr11	60618225	60618230	60618225	60618230	+	1	0	0	0
hsa-miR-424-5p	ENSG00000110108	TMEM109	protein_coding	chr11	60689681	60689686	60689659	60689687	+	1	0	0	0
hsa-miR-424-5p	ENSG00000110108	TMEM109	protein_coding	chr11	60689988	60689994	60689967	60689995	+	1	0	0	0
hsa-miR-424-5p	ENSG00000110108	TMEM109	protein_coding	chr11	60690335	60690340	60690335	60690340	+	1	0	0	0
hsa-miR-424-5p	ENSG00000110108	TMEM109	protein_coding	chr11	60690386	60690411	60690383	60690414	+	0	0	0	0
hsa-miR-424-5p	ENSG00000149483	TMEM138	protein_coding	chr11	61136231	61136237	61136217	61136238	+	1	1	0	0
hsa-miR-424-5p	ENSG00000167985	SDHAF2	protein_coding	chr11	61213799	61213804	61213799	61213804	+	1	0	0	0
hsa-miR-424-5p	ENSG00000134780	DAGLA	protein_coding	chr11	61495689	61495717	61495689	61495717	+	0	0	0	0
hsa-miR-424-5p	ENSG00000134780	DAGLA	protein_coding	chr11	61511084	61511106	61511078	61511112	+	0	0	0	0
hsa-miR-424-5p	ENSG00000134780	DAGLA	protein_coding	chr11	61511327	61511355	61511327	61511355	+	0	0	0	0
hsa-miR-424-5p	ENSG00000134780	DAGLA	protein_coding	chr11	61512069	61512097	61512069	61512097	+	0	0	0	0
hsa-miR-424-5p	ENSG00000134780	DAGLA	protein_coding	chr11	61512323	61512328	61512323	61512328	+	1	0	0	0
hsa-miR-424-5p	ENSG00000134780	DAGLA	protein_coding	chr11	61512491	61512496	61512469	61512497	+	1	0	0	0
hsa-miR-424-5p	ENSG00000134824	FADS2	protein_coding	chr11	61634178	61634183	61634178	61634183	+	1	0	0	0
hsa-miR-424-5p	ENSG00000149503	INCENP	protein_coding	chr11	61919950	61919956	61919929	61919957	+	1	0	0	0
hsa-miR-424-5p	ENSG00000149503	INCENP	protein_coding	chr11	61920134	61920162	61920134	61920162	+	0	0	0	0
hsa-miR-424-5p	ENSG00000133318	RTN3	protein_coding	chr11	63517513	63517536	63517508	63517536	+	0	1	0	0
hsa-miR-424-5p	ENSG00000133318	RTN3	protein_coding	chr11	63527146	63527149	63527125	63527153	+	2	1	0	0
hsa-miR-424-5p	ENSG00000072518	MARK2	protein_coding	chr11	63676516	63676544	63676516	63676544	+	0	0	0	0
hsa-miR-424-5p	ENSG00000072518	MARK2	protein_coding	chr11	63677347	63677375	63677347	63677375	+	0	0	0	0
hsa-miR-424-5p	ENSG00000072518	MARK2	protein_coding	chr11	63677441	63677469	63677441	63677469	+	0	0	0	0
hsa-miR-424-5p	ENSG00000167770	OTUB1	protein_coding	chr11	63765020	63765048	63765020	63765048	+	0	0	0	0
hsa-miR-424-5p	ENSG00000167770	OTUB1	protein_coding	chr11	63765875	63765881	63765854	63765882	+	1	1	1	0
hsa-miR-424-5p	ENSG00000168439	STIP1	protein_coding	chr11	63971862	63971867	63971862	63971867	+	1	0	0	0
hsa-miR-424-5p	ENSG00000173511	VEGFB	protein_coding	chr11	64005967	64005972	64005967	64005972	+	1	0	0	0
hsa-miR-424-5p	ENSG00000173264	GPR137	protein_coding	chr11	64056785	64056806	64056785	64056806	+	0	1	0	0
hsa-miR-424-5p	ENSG00000173153	ESRRA	protein_coding	chr11	64083804	64083807	64083780	64083810	+	2	1	1	2
hsa-miR-424-5p	ENSG00000162302	RPS6KA4	protein_coding	chr11	64128622	64128650	64128622	64128650	+	0	0	0	0
hsa-miR-424-5p	ENSG00000213465	ARL2	protein_coding	chr11	64789449	64789451	64789424	64789474	+	2	1	2	2
hsa-miR-424-5p	ENSG00000213465	ARL2	protein_coding	chr11	64789467	64789470	64789465	64789473	+	2	0	1	1
hsa-miR-424-5p	ENSG00000213465	ARL2	protein_coding	chr11	64789583	64789588	64789561	64789598	+	1	1	0	0
hsa-miR-424-5p	ENSG00000213465	ARL2	protein_coding	chr11	64789592	64789597	64789591	64789598	+	1	0	1	1
hsa-miR-424-5p	ENSG00000149823	VPS51	protein_coding	chr11	64876861	64876889	64876861	64876889	+	0	0	0	0
hsa-miR-424-5p	ENSG00000149823	VPS51	protein_coding	chr11	64878818	64878846	64878818	64878846	+	0	0	0	0
hsa-miR-424-5p	ENSG00000149823	VPS51	protein_coding	chr11	64878963	64878969	64878941	64878991	+	0	0	0	0
hsa-miR-424-5p	ENSG00000149798	CDC42EP2	protein_coding	chr11	65089553	65089556	65089529	65089560	+	2	0	1	2
hsa-miR-424-5p	ENSG00000126391	FRMD8	protein_coding	chr11	65180436	65180442	65180415	65180443	+	1	0	0	0
hsa-miR-424-5p	ENSG00000172818	OVOL1	protein_coding	chr11	65563738	65563743	65563738	65563743	+	1	0	0	0
hsa-miR-424-5p	ENSG00000172818	OVOL1	protein_coding	chr11	65564515	65564520	65564515	65564520	+	1	0	0	0
hsa-miR-424-5p	ENSG00000172732	MUS81	protein_coding	chr11	65633724	65633729	65633724	65633729	+	1	0	0	0
hsa-miR-424-5p	ENSG00000174996	KLC2	protein_coding	chr11	66034500	66034506	66034500	66034506	+	1	0	1	1
hsa-miR-424-5p	ENSG00000174996	KLC2	protein_coding	chr11	66035278	66035283	66035278	66035283	+	1	0	0	0
hsa-miR-424-5p	ENSG00000174903	RAB1B	protein_coding	chr11	66044694	66044699	66044694	66044699	+	1	0	0	0
hsa-miR-424-5p	ENSG00000174871	CNIH2	protein_coding	chr11	66051205	66051211	66051191	66051212	+	1	1	1	1
hsa-miR-424-5p	ENSG00000174516	PELI3	protein_coding	chr11	66243655	66243661	66243634	66243662	+	1	0	0	0
hsa-miR-424-5p	ENSG00000174516	PELI3	protein_coding	chr11	66244417	66244422	66244395	66244423	+	1	0	0	0
hsa-miR-424-5p	ENSG00000173653	RCE1	protein_coding	chr11	66611280	66611308	66611280	66611308	+	0	0	0	0
hsa-miR-424-5p	ENSG00000173653	RCE1	protein_coding	chr11	66613839	66613845	66613818	66613846	+	1	1	0	0
hsa-miR-424-5p	ENSG00000173653	RCE1	protein_coding	chr11	66613872	66613877	66613850	66613878	+	1	0	0	0
hsa-miR-424-5p	ENSG00000173227	SYT12	protein_coding	chr11	66816258	66816263	66816258	66816263	+	1	0	0	0
hsa-miR-424-5p	ENSG00000173156	RHOD	protein_coding	chr11	66839367	66839372	66839367	66839372	+	1	0	0	0
hsa-miR-424-5p	ENSG00000173020	GRK2	protein_coding	chr11	67053545	67053551	67053524	67053564	+	1	0	0	0
hsa-miR-424-5p	ENSG00000172932	ANKRD13D	protein_coding	chr11	67069875	67069881	67069854	67069882	+	1	1	0	0
hsa-miR-424-5p	ENSG00000172830	SSH3	protein_coding	chr11	67072426	67072454	67072426	67072454	+	0	0	0	0
hsa-miR-424-5p	ENSG00000172613	RAD9A	protein_coding	chr11	67165386	67165392	67165386	67165392	+	1	0	0	0
hsa-miR-424-5p	ENSG00000172613	RAD9A	protein_coding	chr11	67165845	67165850	67165845	67165851	+	1	0	1	0
hsa-miR-424-5p	ENSG00000175634	RPS6KB2	protein_coding	chr11	67201499	67201520	67201499	67201520	+	0	1	0	0
hsa-miR-424-5p	ENSG00000006534	ALDH3B1	protein_coding	chr11	67796404	67796410	67796404	67796410	+	1	0	0	0
hsa-miR-424-5p	ENSG00000006534	ALDH3B1	protein_coding	chr11	67796578	67796583	67796578	67796583	+	1	0	0	0
hsa-miR-424-5p	ENSG00000162337	LRP5	protein_coding	chr11	68080214	68080224	68080196	68080242	+	0	0	0	0
hsa-miR-424-5p	ENSG00000110075	PPP6R3	protein_coding	chr11	68380597	68380603	68380586	68380607	+	0	1	1	0
hsa-miR-424-5p	ENSG00000110075	PPP6R3	protein_coding	chr11	68381556	68381562	68381541	68381563	+	1	1	0	1
hsa-miR-424-5p	ENSG00000132740	IGHMBP2	protein_coding	chr11	68675619	68675642	68675619	68675642	+	0	1	0	0
hsa-miR-424-5p	ENSG00000162341	TPCN2	protein_coding	chr11	68855607	68855612	68855607	68855612	+	1	0	0	0
hsa-miR-424-5p	ENSG00000162341	TPCN2	protein_coding	chr11	68855654	68855659	68855654	68855659	+	1	0	0	0
hsa-miR-424-5p	ENSG00000172927	MYEOV	protein_coding	chr11	69064571	69064576	69064571	69064576	+	1	0	0	0
hsa-miR-424-5p	ENSG00000110092	CCND1	protein_coding	chr11	69468011	69468016	69467989	69468017	+	1	0	1	1
hsa-miR-424-5p	ENSG00000110092	CCND1	protein_coding	chr11	69468084	69468089	69468062	69468090	+	1	1	1	1
hsa-miR-424-5p	ENSG00000085733	CTTN	protein_coding	chr11	70281944	70281949	70281944	70281949	+	1	0	0	0
hsa-miR-424-5p	ENSG00000158483	FAM86C1	protein_coding	chr11	71511613	71511618	71511613	71511618	+	1	0	0	0
hsa-miR-424-5p	ENSG00000054967	RELT	protein_coding	chr11	73105592	73105620	73105592	73105620	+	0	0	0	0
hsa-miR-424-5p	ENSG00000054967	RELT	protein_coding	chr11	73105629	73105657	73105629	73105657	+	0	0	0	0
hsa-miR-424-5p	ENSG00000054967	RELT	protein_coding	chr11	73107216	73107222	73107195	73107223	+	1	1	0	1
hsa-miR-424-5p	ENSG00000175575	PAAF1	protein_coding	chr11	73625474	73625495	73625474	73625495	+	0	1	0	0
hsa-miR-424-5p	ENSG00000077514	POLD3	protein_coding	chr11	74351730	74351758	74351730	74351758	+	0	0	0	0
hsa-miR-424-5p	ENSG00000077514	POLD3	protein_coding	chr11	74352586	74352588	74352561	74352614	+	1	0	0	0
hsa-miR-424-5p	ENSG00000077514	POLD3	protein_coding	chr11	74352607	74352613	74352591	74352614	+	1	1	0	0
hsa-miR-424-5p	ENSG00000166439	RNF169	protein_coding	chr11	74549487	74549493	74549466	74549494	+	1	0	0	0
hsa-miR-424-5p	ENSG00000166439	RNF169	protein_coding	chr11	74549775	74549780	74549753	74549781	+	1	0	0	0
hsa-miR-424-5p	ENSG00000166439	RNF169	protein_coding	chr11	74551539	74551544	74551517	74551545	+	1	0	0	0
hsa-miR-424-5p	ENSG00000166439	RNF169	protein_coding	chr11	74552435	74552440	74552413	74552441	+	1	0	0	0
hsa-miR-424-5p	ENSG00000178301	AQP11	protein_coding	chr11	77301090	77301118	77301090	77301118	+	0	0	0	0
hsa-miR-424-5p	ENSG00000178301	AQP11	protein_coding	chr11	77320649	77320655	77320628	77320656	+	1	1	0	1
hsa-miR-424-5p	ENSG00000118369	USP35	protein_coding	chr11	77921372	77921400	77921372	77921400	+	0	0	0	0
hsa-miR-424-5p	ENSG00000171202	TMEM126A	protein_coding	chr11	85365125	85365153	85365125	85365153	+	0	0	0	0
hsa-miR-424-5p	ENSG00000171202	TMEM126A	protein_coding	chr11	85365194	85365222	85365194	85365222	+	0	0	0	0
hsa-miR-424-5p	ENSG00000074266	EED	protein_coding	chr11	85989471	85989477	85989458	85989478	+	1	1	0	1
hsa-miR-424-5p	ENSG00000149196	HIKESHI	protein_coding	chr11	86048525	86048546	86048518	86048546	+	0	1	0	0
hsa-miR-424-5p	ENSG00000166575	TMEM135	protein_coding	chr11	87032886	87032892	87032872	87032893	+	1	1	1	1
hsa-miR-424-5p	ENSG00000165323	FAT3	protein_coding	chr11	92532428	92532456	92532428	92532456	+	0	0	0	0
hsa-miR-424-5p	ENSG00000165323	FAT3	protein_coding	chr11	92626481	92626486	92626459	92626487	+	1	0	0	0
hsa-miR-424-5p	ENSG00000165323	FAT3	protein_coding	chr11	92627402	92627408	92627381	92627409	+	1	1	1	0
hsa-miR-424-5p	ENSG00000110218	PANX1	protein_coding	chr11	93914677	93914683	93914660	93914684	+	1	1	0	0
hsa-miR-424-5p	ENSG00000168876	ANKRD49	protein_coding	chr11	94231502	94231525	94231502	94231525	+	0	1	0	0
hsa-miR-424-5p	ENSG00000196371	FUT4	protein_coding	chr11	94279109	94279116	94279109	94279116	+	1	0	0	0
hsa-miR-424-5p	ENSG00000166025	AMOTL1	protein_coding	chr11	94604810	94604815	94604810	94604815	+	1	0	0	0
hsa-miR-424-5p	ENSG00000166025	AMOTL1	protein_coding	chr11	94609778	94609784	94609757	94609785	+	1	1	1	1
hsa-miR-424-5p	ENSG00000137693	YAP1	protein_coding	chr11	102100833	102100839	102100812	102100840	+	1	1	0	1
hsa-miR-424-5p	ENSG00000137693	YAP1	protein_coding	chr11	102102528	102102533	102102506	102102534	+	1	0	0	0
hsa-miR-424-5p	ENSG00000187240	DYNC2H1	protein_coding	chr11	103270495	103270523	103270495	103270523	+	0	0	0	0
hsa-miR-424-5p	ENSG00000149313	AASDHPPT	protein_coding	chr11	105950350	105950371	105950350	105950371	+	0	1	0	0
hsa-miR-424-5p	ENSG00000149313	AASDHPPT	protein_coding	chr11	105968327	105968330	105968313	105968334	+	2	1	0	0
hsa-miR-424-5p	ENSG00000149289	ZC3H12C	protein_coding	chr11	110042105	110042111	110042088	110042112	+	1	1	0	0
hsa-miR-424-5p	ENSG00000170145	SIK2	protein_coding	chr11	111595382	111595387	111595360	111595388	+	1	0	0	0
hsa-miR-424-5p	ENSG00000170145	SIK2	protein_coding	chr11	111597308	111597313	111597286	111597314	+	1	0	0	0
hsa-miR-424-5p	ENSG00000170145	SIK2	protein_coding	chr11	111597371	111597377	111597350	111597378	+	1	0	0	0
hsa-miR-424-5p	ENSG00000150764	DIXDC1	protein_coding	chr11	111889806	111889811	111889806	111889811	+	1	0	0	0
hsa-miR-424-5p	ENSG00000150764	DIXDC1	protein_coding	chr11	111890081	111890086	111890081	111890087	+	1	0	1	1
hsa-miR-424-5p	ENSG00000150764	DIXDC1	protein_coding	chr11	111890591	111890596	111890573	111890597	+	1	1	1	1
hsa-miR-424-5p	ENSG00000076053	RBM7	protein_coding	chr11	114279330	114279336	114279316	114279337	+	1	1	0	0
hsa-miR-424-5p	ENSG00000110245	APOC3	protein_coding	chr11	116703779	116703784	116703779	116703784	+	1	0	0	0
hsa-miR-424-5p	ENSG00000168092	PAFAH1B2	protein_coding	chr11	117039063	117039069	117039042	117039070	+	0	0	1	1
hsa-miR-424-5p	ENSG00000168092	PAFAH1B2	protein_coding	chr11	117039874	117039879	117039852	117039880	+	0	0	0	0
hsa-miR-424-5p	ENSG00000168092	PAFAH1B2	protein_coding	chr11	117041637	117041643	117041616	117041644	+	0	1	0	1
hsa-miR-424-5p	ENSG00000149577	SIDT2	protein_coding	chr11	117067024	117067030	117067003	117067031	+	1	1	1	1
hsa-miR-424-5p	ENSG00000110324	IL10RA	protein_coding	chr11	117871289	117871295	117871274	117871296	+	1	1	0	1
hsa-miR-424-5p	ENSG00000198851	CD3E	protein_coding	chr11	118184479	118184507	118184479	118184507	+	0	0	0	0
hsa-miR-424-5p	ENSG00000198851	CD3E	protein_coding	chr11	118186451	118186457	118186430	118186458	+	1	1	0	0
hsa-miR-424-5p	ENSG00000110344	UBE4A	protein_coding	chr11	118235819	118235847	118235819	118235847	+	0	0	0	0
hsa-miR-424-5p	ENSG00000110344	UBE4A	protein_coding	chr11	118245790	118245818	118245790	118245818	+	0	0	0	0
hsa-miR-424-5p	ENSG00000110344	UBE4A	protein_coding	chr11	118250224	118250252	118250224	118250252	+	0	0	0	0
hsa-miR-424-5p	ENSG00000110344	UBE4A	protein_coding	chr11	118267537	118267543	118267516	118267544	+	1	1	0	0
hsa-miR-424-5p	ENSG00000110344	UBE4A	protein_coding	chr11	118269118	118269124	118269097	118269125	+	1	1	0	1
hsa-miR-424-5p	ENSG00000118058	KMT2A	protein_coding	chr11	118321133	118321139	118321133	118321139	+	0	0	0	0
hsa-miR-424-5p	ENSG00000118058	KMT2A	protein_coding	chr11	118396015	118396021	118396014	118396021	+	0	0	1	1
hsa-miR-424-5p	ENSG00000095139	ARCN1	protein_coding	chr11	118471648	118471653	118471633	118471654	+	1	1	1	0
hsa-miR-424-5p	ENSG00000095139	ARCN1	protein_coding	chr11	118472074	118472079	118472074	118472079	+	1	0	0	0
hsa-miR-424-5p	ENSG00000095139	ARCN1	protein_coding	chr11	118472586	118472589	118472573	118472593	+	1	1	2	0
hsa-miR-424-5p	ENSG00000186166	CCDC84	protein_coding	chr11	118869192	118869213	118869192	118869213	+	0	1	0	0
hsa-miR-424-5p	ENSG00000196655	TRAPPC4	protein_coding	chr11	118889603	118889625	118889597	118889625	+	0	1	0	0
hsa-miR-424-5p	ENSG00000256269	HMBS	protein_coding	chr11	118964022	118964028	118964021	118964028	+	1	0	0	0
hsa-miR-424-5p	ENSG00000160703	NLRX1	protein_coding	chr11	119044630	119044658	119044630	119044658	+	0	0	0	0
hsa-miR-424-5p	ENSG00000160703	NLRX1	protein_coding	chr11	119053863	119053891	119053863	119053891	+	0	0	0	0
hsa-miR-424-5p	ENSG00000160703	NLRX1	protein_coding	chr11	119054692	119054698	119054671	119054699	+	1	2	0	0
hsa-miR-424-5p	ENSG00000110395	CBL	protein_coding	chr11	119174559	119174564	119174559	119174564	+	1	0	0	0
hsa-miR-424-5p	ENSG00000196914	ARHGEF12	protein_coding	chr11	120335960	120335985	120335957	120335988	+	0	0	0	0
hsa-miR-424-5p	ENSG00000196914	ARHGEF12	protein_coding	chr11	120356357	120356385	120356357	120356385	+	0	0	0	0
hsa-miR-424-5p	ENSG00000196914	ARHGEF12	protein_coding	chr11	120357737	120357743	120357716	120357744	+	1	1	0	0
hsa-miR-424-5p	ENSG00000154114	TBCEL	protein_coding	chr11	120918296	120918317	120918289	120918317	+	0	1	0	0
hsa-miR-424-5p	ENSG00000285509	AP000646.1	protein_coding	chr11	120918296	120918317	120918289	120918317	+	0	1	0	0
hsa-miR-424-5p	ENSG00000154114	TBCEL	protein_coding	chr11	120960285	120960291	120960264	120960292	+	0	1	0	0
hsa-miR-424-5p	ENSG00000154127	UBASH3B	protein_coding	chr11	122680922	122680927	122680922	122680927	+	1	0	0	0
hsa-miR-424-5p	ENSG00000154144	TBRG1	protein_coding	chr11	124502298	124502303	124502276	124502304	+	1	0	0	0
hsa-miR-424-5p	ENSG00000154144	TBRG1	protein_coding	chr11	124502888	124502893	124502866	124502897	+	1	0	0	0
hsa-miR-424-5p	ENSG00000154144	TBRG1	protein_coding	chr11	124503710	124503716	124503689	124503717	+	1	1	0	1
hsa-miR-424-5p	ENSG00000134955	SLC37A2	protein_coding	chr11	124949037	124949065	124949037	124949065	+	0	0	0	0
hsa-miR-424-5p	ENSG00000149554	CHEK1	protein_coding	chr11	125525254	125525259	125525232	125525260	+	1	1	1	1
hsa-miR-424-5p	ENSG00000110074	FOXRED1	protein_coding	chr11	126147645	126147651	126147631	126147652	+	1	1	0	0
hsa-miR-424-5p	ENSG00000151715	TMEM45B	protein_coding	chr11	129728948	129728954	129728936	129728955	+	1	1	0	0
hsa-miR-424-5p	ENSG00000084234	APLP2	protein_coding	chr11	130014043	130014046	130014041	130014049	+	2	0	0	0
hsa-miR-424-5p	ENSG00000166106	ADAMTS15	protein_coding	chr11	130344052	130344080	130344052	130344080	+	0	0	0	0
hsa-miR-424-5p	ENSG00000166086	JAM3	protein_coding	chr11	134020984	134020989	134020984	134020989	+	1	0	0	0
hsa-miR-424-5p	ENSG00000002016	RAD52	protein_coding	chr12	1022472	1022477	1022472	1022477	-	1	0	0	0
hsa-miR-424-5p	ENSG00000151062	CACNA2D4	protein_coding	chr12	1910760	1910788	1910760	1910788	-	0	0	0	0
hsa-miR-424-5p	ENSG00000110799	VWF	protein_coding	chr12	6058150	6058156	6058150	6058156	-	1	0	0	0
hsa-miR-424-5p	ENSG00000110799	VWF	protein_coding	chr12	6058173	6058192	6058173	6058192	-	0	0	0	0
hsa-miR-424-5p	ENSG00000110799	VWF	protein_coding	chr12	6058299	6058323	6058299	6058323	-	0	1	0	0
hsa-miR-424-5p	ENSG00000067182	TNFRSF1A	protein_coding	chr12	6438184	6438189	6438184	6438189	-	1	0	0	0
hsa-miR-424-5p	ENSG00000139190	VAMP1	protein_coding	chr12	6573452	6573458	6573451	6573479	-	1	1	1	1
hsa-miR-424-5p	ENSG00000111641	NOP2	protein_coding	chr12	6666169	6666172	6666165	6666187	-	0	1	0	0
hsa-miR-424-5p	ENSG00000285238	AC006064.6	protein_coding	chr12	6666169	6666172	6666165	6666187	-	0	1	0	0
hsa-miR-424-5p	ENSG00000177575	CD163	protein_coding	chr12	7623865	7623871	7623864	7623892	-	1	1	0	1
hsa-miR-424-5p	ENSG00000177575	CD163	protein_coding	chr12	7632557	7632585	7632557	7632585	-	0	0	0	0
hsa-miR-424-5p	ENSG00000177575	CD163	protein_coding	chr12	7649604	7649632	7649604	7649632	-	0	0	0	0
hsa-miR-424-5p	ENSG00000059804	SLC2A3	protein_coding	chr12	8073906	8073911	8073905	8073933	-	1	1	1	1
hsa-miR-424-5p	ENSG00000059804	SLC2A3	protein_coding	chr12	8085675	8085703	8085675	8085703	-	0	0	0	0
hsa-miR-424-5p	ENSG00000197614	MFAP5	protein_coding	chr12	8800460	8800466	8800459	8800487	-	1	1	0	0
hsa-miR-424-5p	ENSG00000197614	MFAP5	protein_coding	chr12	8814671	8814699	8814671	8814699	-	0	0	0	0
hsa-miR-424-5p	ENSG00000003056	M6PR	protein_coding	chr12	9093396	9093402	9093396	9093402	-	1	0	0	0
hsa-miR-424-5p	ENSG00000003056	M6PR	protein_coding	chr12	9093931	9093937	9093930	9093951	-	1	1	0	1
hsa-miR-424-5p	ENSG00000110848	CD69	protein_coding	chr12	9906006	9906012	9906005	9906025	-	1	1	0	1
hsa-miR-424-5p	ENSG00000173391	OLR1	protein_coding	chr12	10310918	10310923	10310918	10310923	-	1	0	0	0
hsa-miR-424-5p	ENSG00000070018	LRP6	protein_coding	chr12	12269269	12269275	12269268	12269296	-	1	0	0	1
hsa-miR-424-5p	ENSG00000070018	LRP6	protein_coding	chr12	12272473	12272501	12272473	12272501	-	0	0	0	0
hsa-miR-424-5p	ENSG00000070018	LRP6	protein_coding	chr12	12273853	12273859	12273852	12273880	-	1	1	1	1
hsa-miR-424-5p	ENSG00000084463	WBP11	protein_coding	chr12	14939785	14939790	14939784	14939812	-	1	1	1	1
hsa-miR-424-5p	ENSG00000084463	WBP11	protein_coding	chr12	14939912	14939917	14939911	14939939	-	1	0	0	0
hsa-miR-424-5p	ENSG00000084463	WBP11	protein_coding	chr12	14940139	14940167	14940139	14940167	-	0	0	0	0
hsa-miR-424-5p	ENSG00000134532	SOX5	protein_coding	chr12	23686889	23686894	23686888	23686894	-	1	0	1	1
hsa-miR-424-5p	ENSG00000133703	KRAS	protein_coding	chr12	25360829	25360835	25360829	25360835	-	1	0	0	1
hsa-miR-424-5p	ENSG00000123095	BHLHE41	protein_coding	chr12	26273626	26273629	26273623	26273653	-	2	1	1	2
hsa-miR-424-5p	ENSG00000087494	PTHLH	protein_coding	chr12	28111232	28111235	28111228	28111250	-	1	1	2	1
hsa-miR-424-5p	ENSG00000133704	IPO8	protein_coding	chr12	30783229	30783235	30783228	30783256	-	1	0	0	0
hsa-miR-424-5p	ENSG00000133704	IPO8	protein_coding	chr12	30783704	30783709	30783686	30783731	-	1	0	0	0
hsa-miR-424-5p	ENSG00000133704	IPO8	protein_coding	chr12	30792544	30792572	30792544	30792572	-	0	0	0	0
hsa-miR-424-5p	ENSG00000139146	SINHCAF	protein_coding	chr12	31435169	31435175	31435168	31435196	-	1	1	1	1
hsa-miR-424-5p	ENSG00000139131	YARS2	protein_coding	chr12	32899849	32899855	32899848	32899869	-	1	1	0	0
hsa-miR-424-5p	ENSG00000139116	KIF21A	protein_coding	chr12	39687371	39687376	39687370	39687392	-	1	1	1	1
hsa-miR-424-5p	ENSG00000151229	SLC2A13	protein_coding	chr12	40149822	40149828	40149821	40149845	-	1	1	0	1
hsa-miR-424-5p	ENSG00000139218	SCAF11	protein_coding	chr12	46315196	46315202	46315195	46315217	-	1	1	0	1
hsa-miR-424-5p	ENSG00000111371	SLC38A1	protein_coding	chr12	46579392	46579398	46579392	46579398	-	1	0	0	0
hsa-miR-424-5p	ENSG00000139209	SLC38A4	protein_coding	chr12	47160209	47160215	47160208	47160236	-	1	1	0	0
hsa-miR-424-5p	ENSG00000061273	HDAC7	protein_coding	chr12	48176730	48176735	48176730	48176735	-	1	0	0	0
hsa-miR-424-5p	ENSG00000061273	HDAC7	protein_coding	chr12	48187300	48187319	48187300	48187319	-	0	0	0	0
hsa-miR-424-5p	ENSG00000079387	SENP1	protein_coding	chr12	48439022	48439027	48439022	48439027	-	1	0	0	0
hsa-miR-424-5p	ENSG00000129315	CCNT1	protein_coding	chr12	49083250	49083256	49083249	49083277	-	0	0	0	0
hsa-miR-424-5p	ENSG00000129315	CCNT1	protein_coding	chr12	49084280	49084283	49084276	49084307	-	0	0	0	0
hsa-miR-424-5p	ENSG00000129315	CCNT1	protein_coding	chr12	49085079	49085084	49085078	49085106	-	0	0	1	0
hsa-miR-424-5p	ENSG00000174233	ADCY6	protein_coding	chr12	49168516	49168538	49168516	49168538	-	0	0	0	0
hsa-miR-424-5p	ENSG00000272822	AC073610.3	protein_coding	chr12	49297341	49297347	49297341	49297347	-	0	0	0	0
hsa-miR-424-5p	ENSG00000134285	FKBP11	protein_coding	chr12	49316533	49316554	49316533	49316554	-	0	1	0	0
hsa-miR-424-5p	ENSG00000134287	ARF3	protein_coding	chr12	49330322	49330327	49330322	49330327	-	1	0	0	0
hsa-miR-424-5p	ENSG00000167548	KMT2D	protein_coding	chr12	49413572	49413577	49413571	49413599	-	1	0	0	0
hsa-miR-424-5p	ENSG00000167548	KMT2D	protein_coding	chr12	49414425	49414431	49414424	49414452	-	1	0	1	1
hsa-miR-424-5p	ENSG00000167548	KMT2D	protein_coding	chr12	49415187	49415193	49415186	49415214	-	1	0	1	0
hsa-miR-424-5p	ENSG00000167548	KMT2D	protein_coding	chr12	49420066	49420094	49420066	49420094	-	0	0	0	0
hsa-miR-424-5p	ENSG00000167548	KMT2D	protein_coding	chr12	49420767	49420795	49420767	49420795	-	0	0	0	0
hsa-miR-424-5p	ENSG00000167548	KMT2D	protein_coding	chr12	49422619	49422647	49422619	49422647	-	0	0	0	0
hsa-miR-424-5p	ENSG00000167548	KMT2D	protein_coding	chr12	49425401	49425429	49425401	49425429	-	0	0	0	0
hsa-miR-424-5p	ENSG00000167548	KMT2D	protein_coding	chr12	49440478	49440506	49440478	49440506	-	0	0	0	0
hsa-miR-424-5p	ENSG00000139636	LMBR1L	protein_coding	chr12	49496682	49496710	49496682	49496710	-	0	0	0	0
hsa-miR-424-5p	ENSG00000139636	LMBR1L	protein_coding	chr12	49496878	49496906	49496878	49496906	-	0	0	0	0
hsa-miR-424-5p	ENSG00000139636	LMBR1L	protein_coding	chr12	49498581	49498609	49498581	49498609	-	0	0	0	0
hsa-miR-424-5p	ENSG00000167552	TUBA1A	protein_coding	chr12	49578767	49578773	49578766	49578794	-	1	1	1	1
hsa-miR-424-5p	ENSG00000161791	FMNL3	protein_coding	chr12	50033395	50033400	50033395	50033400	-	1	0	0	0
hsa-miR-424-5p	ENSG00000161791	FMNL3	protein_coding	chr12	50037953	50037958	50037953	50037958	-	1	0	0	0
hsa-miR-424-5p	ENSG00000167566	NCKAP5L	protein_coding	chr12	50184987	50184992	50184987	50184992	-	1	0	0	0
hsa-miR-424-5p	ENSG00000167566	NCKAP5L	protein_coding	chr12	50185250	50185255	50185250	50185255	-	1	0	0	0
hsa-miR-424-5p	ENSG00000161800	RACGAP1	protein_coding	chr12	50383366	50383372	50383365	50383386	-	1	1	0	0
hsa-miR-424-5p	ENSG00000161800	RACGAP1	protein_coding	chr12	50383721	50383727	50383720	50383739	-	1	1	0	0
hsa-miR-424-5p	ENSG00000110911	SLC11A2	protein_coding	chr12	51379930	51379936	51379929	51379957	-	1	1	0	0
hsa-miR-424-5p	ENSG00000110911	SLC11A2	protein_coding	chr12	51380252	51380257	51380251	51380279	-	1	0	0	0
hsa-miR-424-5p	ENSG00000110911	SLC11A2	protein_coding	chr12	51380885	51380888	51380881	51380912	-	2	1	0	1
hsa-miR-424-5p	ENSG00000110911	SLC11A2	protein_coding	chr12	51381873	51381879	51381872	51381900	-	1	1	0	1
hsa-miR-424-5p	ENSG00000110925	CSRNP2	protein_coding	chr12	51457436	51457439	51457432	51457463	-	2	1	1	1
hsa-miR-424-5p	ENSG00000135457	TFCP2	protein_coding	chr12	51488994	51488999	51488993	51489014	-	1	1	0	0
hsa-miR-424-5p	ENSG00000184271	POU6F1	protein_coding	chr12	51583470	51583476	51583470	51583476	-	1	0	0	0
hsa-miR-424-5p	ENSG00000170545	SMAGP	protein_coding	chr12	51639379	51639384	51639379	51639384	-	1	0	0	0
hsa-miR-424-5p	ENSG00000261308	FIGNL2	protein_coding	chr12	52213364	52213369	52213364	52213369	-	1	0	0	0
hsa-miR-424-5p	ENSG00000167767	KRT80	protein_coding	chr12	52564441	52564446	52564441	52564446	-	1	0	0	0
hsa-miR-424-5p	ENSG00000167767	KRT80	protein_coding	chr12	52564669	52564674	52564669	52564674	-	1	0	0	0
hsa-miR-424-5p	ENSG00000167778	SPRYD3	protein_coding	chr12	53458485	53458491	53458484	53458512	-	1	0	0	1
hsa-miR-424-5p	ENSG00000167778	SPRYD3	protein_coding	chr12	53458698	53458704	53458697	53458725	-	1	1	1	1
hsa-miR-424-5p	ENSG00000167778	SPRYD3	protein_coding	chr12	53459079	53459107	53459079	53459107	-	0	0	0	0
hsa-miR-424-5p	ENSG00000167778	SPRYD3	protein_coding	chr12	53459143	53459149	53459142	53459170	-	1	1	1	1
hsa-miR-424-5p	ENSG00000167778	SPRYD3	protein_coding	chr12	53459264	53459269	53459263	53459291	-	1	0	0	0
hsa-miR-424-5p	ENSG00000172819	RARG	protein_coding	chr12	53604657	53604663	53604656	53604677	-	1	1	0	0
hsa-miR-424-5p	ENSG00000170653	ATF7	protein_coding	chr12	53907824	53907830	53907824	53907830	-	0	0	0	0
hsa-miR-424-5p	ENSG00000170653	ATF7	protein_coding	chr12	53908751	53908756	53908751	53908756	-	0	0	0	0
hsa-miR-424-5p	ENSG00000170653	ATF7	protein_coding	chr12	53910406	53910411	53910406	53910411	-	1	0	0	0
hsa-miR-424-5p	ENSG00000094916	CBX5	protein_coding	chr12	54626042	54626047	54626041	54626047	-	0	0	1	1
hsa-miR-424-5p	ENSG00000094916	CBX5	protein_coding	chr12	54627351	54627356	54627351	54627356	-	0	0	0	0
hsa-miR-424-5p	ENSG00000094916	CBX5	protein_coding	chr12	54633067	54633072	54633067	54633072	-	0	0	0	0
hsa-miR-424-5p	ENSG00000094916	CBX5	protein_coding	chr12	54633649	54633654	54633649	54633654	-	0	0	0	0
hsa-miR-424-5p	ENSG00000135424	ITGA7	protein_coding	chr12	56078895	56078923	56078895	56078923	-	0	0	0	0
hsa-miR-424-5p	ENSG00000135424	ITGA7	protein_coding	chr12	56081788	56081792	56081764	56081816	-	0	0	0	0
hsa-miR-424-5p	ENSG00000170473	PYM1	protein_coding	chr12	56295398	56295404	56295397	56295418	-	1	1	1	0
hsa-miR-424-5p	ENSG00000181852	RNF41	protein_coding	chr12	56598507	56598512	56598506	56598528	-	1	1	1	0
hsa-miR-424-5p	ENSG00000139645	ANKRD52	protein_coding	chr12	56632390	56632395	56632389	56632417	-	1	0	0	0
hsa-miR-424-5p	ENSG00000139645	ANKRD52	protein_coding	chr12	56632889	56632917	56632889	56632917	-	0	0	0	0
hsa-miR-424-5p	ENSG00000139645	ANKRD52	protein_coding	chr12	56636782	56636787	56636781	56636809	-	1	0	0	0
hsa-miR-424-5p	ENSG00000139645	ANKRD52	protein_coding	chr12	56638524	56638552	56638524	56638552	-	0	0	0	0
hsa-miR-424-5p	ENSG00000139645	ANKRD52	protein_coding	chr12	56641337	56641337	56641309	56641365	-	0	0	0	0
hsa-miR-424-5p	ENSG00000139645	ANKRD52	protein_coding	chr12	56646574	56646599	56646571	56646602	-	0	0	0	0
hsa-miR-424-5p	ENSG00000139645	ANKRD52	protein_coding	chr12	56650813	56650841	56650813	56650841	-	0	0	0	0
hsa-miR-424-5p	ENSG00000139645	ANKRD52	protein_coding	chr12	56651112	56651140	56651112	56651140	-	0	0	0	0
hsa-miR-424-5p	ENSG00000062485	CS	protein_coding	chr12	56667374	56667396	56667374	56667402	-	0	1	0	0
hsa-miR-424-5p	ENSG00000062485	CS	protein_coding	chr12	56676674	56676702	56676674	56676702	-	0	0	0	0
hsa-miR-424-5p	ENSG00000135423	GLS2	protein_coding	chr12	56864804	56864823	56864804	56864823	-	0	1	0	0
hsa-miR-424-5p	ENSG00000076108	BAZ2A	protein_coding	chr12	56990802	56990807	56990801	56990829	-	1	0	0	0
hsa-miR-424-5p	ENSG00000076108	BAZ2A	protein_coding	chr12	56990905	56990910	56990904	56990932	-	1	0	0	0
hsa-miR-424-5p	ENSG00000076108	BAZ2A	protein_coding	chr12	56991890	56991896	56991889	56991917	-	1	0	1	1
hsa-miR-424-5p	ENSG00000166860	ZBTB39	protein_coding	chr12	57394637	57394643	57394636	57394664	-	1	0	0	0
hsa-miR-424-5p	ENSG00000166860	ZBTB39	protein_coding	chr12	57396218	57396223	57396217	57396245	-	1	1	1	1
hsa-miR-424-5p	ENSG00000166881	NEMP1	protein_coding	chr12	57451235	57451240	57451235	57451240	-	1	0	0	0
hsa-miR-424-5p	ENSG00000166881	NEMP1	protein_coding	chr12	57451342	57451348	57451342	57451348	-	1	0	0	0
hsa-miR-424-5p	ENSG00000135446	CDK4	protein_coding	chr12	58142966	58142972	58142966	58142972	-	0	0	0	1
hsa-miR-424-5p	ENSG00000175215	CTDSP2	protein_coding	chr12	58214362	58214367	58214361	58214389	-	1	0	0	0
hsa-miR-424-5p	ENSG00000175215	CTDSP2	protein_coding	chr12	58215390	58215395	58215389	58215417	-	1	0	0	0
hsa-miR-424-5p	ENSG00000175215	CTDSP2	protein_coding	chr12	58216000	58216006	58215999	58216027	-	1	1	0	1
hsa-miR-424-5p	ENSG00000175215	CTDSP2	protein_coding	chr12	58216866	58216894	58216866	58216894	-	0	0	0	0
hsa-miR-424-5p	ENSG00000111110	PPM1H	protein_coding	chr12	63042047	63042052	63042046	63042052	-	1	0	0	1
hsa-miR-424-5p	ENSG00000135678	CPM	protein_coding	chr12	69249063	69249068	69249063	69249068	-	1	0	0	0
hsa-miR-424-5p	ENSG00000153233	PTPRR	protein_coding	chr12	71032473	71032496	71032473	71032501	-	0	1	0	0
hsa-miR-424-5p	ENSG00000133858	ZFC3H1	protein_coding	chr12	72004864	72004892	72004864	72004892	-	0	0	0	0
hsa-miR-424-5p	ENSG00000133858	ZFC3H1	protein_coding	chr12	72030681	72030709	72030681	72030709	-	0	0	0	0
hsa-miR-424-5p	ENSG00000187109	NAP1L1	protein_coding	chr12	76442959	76442965	76442959	76442965	-	0	0	0	0
hsa-miR-424-5p	ENSG00000165891	E2F7	protein_coding	chr12	77415209	77415215	77415208	77415236	-	1	1	1	1
hsa-miR-424-5p	ENSG00000165891	E2F7	protein_coding	chr12	77415265	77415270	77415264	77415292	-	1	0	0	0
hsa-miR-424-5p	ENSG00000165891	E2F7	protein_coding	chr12	77415571	77415599	77415571	77415599	-	0	0	0	0
hsa-miR-424-5p	ENSG00000165891	E2F7	protein_coding	chr12	77417031	77417037	77417030	77417058	-	1	1	0	0
hsa-miR-424-5p	ENSG00000177425	PAWR	protein_coding	chr12	79979617	79979622	79979617	79979622	-	0	0	0	0
hsa-miR-424-5p	ENSG00000177425	PAWR	protein_coding	chr12	79984798	79984801	79984795	79984803	-	0	0	0	0
hsa-miR-424-5p	ENSG00000058272	PPP1R12A	protein_coding	chr12	80169463	80169468	80169463	80169468	-	1	0	0	0
hsa-miR-424-5p	ENSG00000111052	LIN7A	protein_coding	chr12	81186325	81186331	81186324	81186352	-	0	0	0	1
hsa-miR-424-5p	ENSG00000111052	LIN7A	protein_coding	chr12	81190328	81190334	81190327	81190355	-	0	0	0	0
hsa-miR-424-5p	ENSG00000139220	PPFIA2	protein_coding	chr12	81833762	81833784	81833762	81833784	-	0	0	0	0
hsa-miR-424-5p	ENSG00000133773	CCDC59	protein_coding	chr12	82748282	82748302	82748282	82748302	-	0	0	0	0
hsa-miR-424-5p	ENSG00000049130	KITLG	protein_coding	chr12	88887231	88887234	88887227	88887249	-	2	1	0	0
hsa-miR-424-5p	ENSG00000049130	KITLG	protein_coding	chr12	88888715	88888720	88888715	88888720	-	1	0	0	0
hsa-miR-424-5p	ENSG00000139318	DUSP6	protein_coding	chr12	89742955	89742960	89742955	89742960	-	1	0	0	0
hsa-miR-424-5p	ENSG00000139318	DUSP6	protein_coding	chr12	89743154	89743177	89743154	89743177	-	0	0	0	0
hsa-miR-424-5p	ENSG00000257594	GALNT4	protein_coding	chr12	89916408	89916414	89916407	89916435	-	1	1	0	0
hsa-miR-424-5p	ENSG00000259075	POC1B-GALNT4	protein_coding	chr12	89916408	89916414	89916407	89916435	-	1	1	0	0
hsa-miR-424-5p	ENSG00000070961	ATP2B1	protein_coding	chr12	90049804	90049824	90049804	90049824	-	0	0	0	0
hsa-miR-424-5p	ENSG00000102189	EEA1	protein_coding	chr12	93167264	93167269	93167264	93167269	-	1	0	0	0
hsa-miR-424-5p	ENSG00000173588	CEP83	protein_coding	chr12	94763664	94763667	94763661	94763670	-	0	0	0	0
hsa-miR-424-5p	ENSG00000136014	USP44	protein_coding	chr12	95910768	95910774	95910767	95910774	-	0	0	0	1
hsa-miR-424-5p	ENSG00000059758	CDK17	protein_coding	chr12	96673699	96673704	96673698	96673726	-	1	1	1	1
hsa-miR-424-5p	ENSG00000120805	ARL1	protein_coding	chr12	101787932	101787938	101787931	101787952	-	1	1	0	0
hsa-miR-424-5p	ENSG00000111670	GNPTAB	protein_coding	chr12	102189868	102189874	102189868	102189874	-	0	0	0	0
hsa-miR-424-5p	ENSG00000111696	NT5DC3	protein_coding	chr12	104166649	104166655	104166648	104166676	-	1	0	0	0
hsa-miR-424-5p	ENSG00000111696	NT5DC3	protein_coding	chr12	104169593	104169599	104169592	104169620	-	1	1	0	0
hsa-miR-424-5p	ENSG00000111696	NT5DC3	protein_coding	chr12	104171134	104171139	104171133	104171161	-	1	0	0	0
hsa-miR-424-5p	ENSG00000111696	NT5DC3	protein_coding	chr12	104171179	104171184	104171178	104171206	-	1	0	0	0
hsa-miR-424-5p	ENSG00000136052	SLC41A2	protein_coding	chr12	105197979	105197985	105197978	105198006	-	0	1	0	0
hsa-miR-424-5p	ENSG00000136052	SLC41A2	protein_coding	chr12	105198733	105198739	105198732	105198760	-	1	1	0	1
hsa-miR-424-5p	ENSG00000136052	SLC41A2	protein_coding	chr12	105280137	105280165	105280137	105280165	-	0	0	0	0
hsa-miR-424-5p	ENSG00000136044	APPL2	protein_coding	chr12	105570761	105570789	105570761	105570789	-	0	0	0	0
hsa-miR-424-5p	ENSG00000074590	NUAK1	protein_coding	chr12	106457661	106457667	106457661	106457667	-	1	0	0	1
hsa-miR-424-5p	ENSG00000074590	NUAK1	protein_coding	chr12	106458478	106458484	106458478	106458484	-	1	0	0	0
hsa-miR-424-5p	ENSG00000136026	CKAP4	protein_coding	chr12	106632244	106632249	106632244	106632249	-	1	0	0	0
hsa-miR-424-5p	ENSG00000110851	PRDM4	protein_coding	chr12	108126727	108126732	108126726	108126754	-	1	1	1	1
hsa-miR-424-5p	ENSG00000139433	GLTP	protein_coding	chr12	110288958	110288963	110288958	110288963	-	1	0	0	0
hsa-miR-424-5p	ENSG00000174456	C12orf76	protein_coding	chr12	110479286	110479291	110479285	110479307	-	1	1	1	1
hsa-miR-424-5p	ENSG00000111231	GPN3	protein_coding	chr12	110890666	110890672	110890665	110890693	-	1	1	0	0
hsa-miR-424-5p	ENSG00000196850	PPTC7	protein_coding	chr12	110971202	110971207	110971201	110971229	-	0	0	0	0
hsa-miR-424-5p	ENSG00000198324	FAM109A	protein_coding	chr12	111798865	111798870	111798865	111798870	-	1	0	0	0
hsa-miR-424-5p	ENSG00000204842	ATXN2	protein_coding	chr12	111890264	111890269	111890263	111890291	-	1	1	1	1
hsa-miR-424-5p	ENSG00000111300	NAA25	protein_coding	chr12	112465029	112465029	112465022	112465056	-	3	1	1	3
hsa-miR-424-5p	ENSG00000111300	NAA25	protein_coding	chr12	112491415	112491443	112491415	112491443	-	0	0	0	0
hsa-miR-424-5p	ENSG00000111300	NAA25	protein_coding	chr12	112492284	112492312	112492284	112492312	-	0	0	0	0
hsa-miR-424-5p	ENSG00000173064	HECTD4	protein_coding	chr12	112598332	112598337	112598332	112598337	-	1	0	0	0
hsa-miR-424-5p	ENSG00000173064	HECTD4	protein_coding	chr12	112598344	112598349	112598343	112598371	-	1	1	1	1
hsa-miR-424-5p	ENSG00000173064	HECTD4	protein_coding	chr12	112605651	112605676	112605648	112605679	-	0	0	0	0
hsa-miR-424-5p	ENSG00000173064	HECTD4	protein_coding	chr12	112610499	112610527	112610499	112610527	-	0	0	0	0
hsa-miR-424-5p	ENSG00000173064	HECTD4	protein_coding	chr12	112647981	112648009	112647981	112648009	-	0	0	0	0
hsa-miR-424-5p	ENSG00000173064	HECTD4	protein_coding	chr12	112668517	112668545	112668517	112668545	-	0	0	0	0
hsa-miR-424-5p	ENSG00000173064	HECTD4	protein_coding	chr12	112673522	112673550	112673522	112673550	-	0	0	0	0
hsa-miR-424-5p	ENSG00000173064	HECTD4	protein_coding	chr12	112757057	112757082	112757054	112757085	-	0	0	0	0
hsa-miR-424-5p	ENSG00000111344	RASAL1	protein_coding	chr12	113537394	113537399	113537394	113537399	-	1	0	0	0
hsa-miR-424-5p	ENSG00000123064	DDX54	protein_coding	chr12	113595163	113595168	113595162	113595190	-	1	0	0	0
hsa-miR-424-5p	ENSG00000123064	DDX54	protein_coding	chr12	113595499	113595504	113595498	113595526	-	1	0	0	0
hsa-miR-424-5p	ENSG00000123064	DDX54	protein_coding	chr12	113596410	113596410	113596403	113596437	-	3	0	0	2
hsa-miR-424-5p	ENSG00000123064	DDX54	protein_coding	chr12	113610216	113610235	113610216	113610235	-	0	0	0	0
hsa-miR-424-5p	ENSG00000123064	DDX54	protein_coding	chr12	113612529	113612557	113612529	113612557	-	0	0	0	0
hsa-miR-424-5p	ENSG00000122965	RBM19	protein_coding	chr12	114260445	114260450	114260445	114260450	-	1	0	0	0
hsa-miR-424-5p	ENSG00000135116	HRK	protein_coding	chr12	117294792	117294798	117294791	117294819	-	0	0	0	0
hsa-miR-424-5p	ENSG00000135116	HRK	protein_coding	chr12	117297506	117297511	117297505	117297533	-	0	0	0	0
hsa-miR-424-5p	ENSG00000135116	HRK	protein_coding	chr12	117297606	117297612	117297605	117297633	-	0	0	0	0
hsa-miR-424-5p	ENSG00000135116	HRK	protein_coding	chr12	117298600	117298628	117298600	117298628	-	0	0	0	0
hsa-miR-424-5p	ENSG00000135108	FBXO21	protein_coding	chr12	117582351	117582357	117582350	117582378	-	1	1	0	0
hsa-miR-424-5p	ENSG00000135108	FBXO21	protein_coding	chr12	117583861	117583861	117583854	117583888	-	3	0	1	2
hsa-miR-424-5p	ENSG00000176834	VSIG10	protein_coding	chr12	118503734	118503739	118503734	118503739	-	1	0	0	0
hsa-miR-424-5p	ENSG00000176834	VSIG10	protein_coding	chr12	118504201	118504206	118504201	118504206	-	1	0	0	0
hsa-miR-424-5p	ENSG00000135090	TAOK3	protein_coding	chr12	118588342	118588347	118588341	118588363	-	1	1	0	0
hsa-miR-424-5p	ENSG00000111737	RAB35	protein_coding	chr12	120535050	120535056	120535050	120535070	-	0	1	1	1
hsa-miR-424-5p	ENSG00000089157	RPLP0	protein_coding	chr12	120634659	120634681	120634653	120634687	-	0	0	0	0
hsa-miR-424-5p	ENSG00000089157	RPLP0	protein_coding	chr12	120634695	120634723	120634695	120634723	-	0	0	0	0
hsa-miR-424-5p	ENSG00000089157	RPLP0	protein_coding	chr12	120636483	120636511	120636483	120636511	-	0	0	0	0
hsa-miR-424-5p	ENSG00000089159	PXN	protein_coding	chr12	120648963	120648968	120648963	120648968	-	1	0	0	0
hsa-miR-424-5p	ENSG00000111786	SRSF9	protein_coding	chr12	120899773	120899778	120899773	120899778	-	1	0	0	0
hsa-miR-424-5p	ENSG00000157837	SPPL3	protein_coding	chr12	121201985	121201990	121201985	121201990	-	1	0	0	0
hsa-miR-424-5p	ENSG00000110931	CAMKK2	protein_coding	chr12	121677768	121677773	121677768	121677773	-	1	0	0	0
hsa-miR-424-5p	ENSG00000110931	CAMKK2	protein_coding	chr12	121677864	121677870	121677864	121677870	-	1	0	0	0
hsa-miR-424-5p	ENSG00000089053	ANAPC5	protein_coding	chr12	121746259	121746264	121746259	121746264	-	1	0	0	0
hsa-miR-424-5p	ENSG00000184047	DIABLO	protein_coding	chr12	122692682	122692687	122692682	122692687	-	1	0	0	0
hsa-miR-424-5p	ENSG00000256861	AC048338.1	protein_coding	chr12	122692682	122692687	122692682	122692687	-	1	0	0	0
hsa-miR-424-5p	ENSG00000284934	DIABLO	protein_coding	chr12	122692682	122692687	122692682	122692687	-	1	0	0	0
hsa-miR-424-5p	ENSG00000139722	VPS37B	protein_coding	chr12	123351111	123351114	123351108	123351116	-	2	0	0	0
hsa-miR-424-5p	ENSG00000090975	PITPNM2	protein_coding	chr12	123469324	123469330	123469324	123469330	-	1	0	0	0
hsa-miR-424-5p	ENSG00000090975	PITPNM2	protein_coding	chr12	123469736	123469741	123469736	123469741	-	1	0	0	0
hsa-miR-424-5p	ENSG00000139697	SBNO1	protein_coding	chr12	123775679	123775685	123775678	123775706	-	0	0	0	0
hsa-miR-424-5p	ENSG00000139697	SBNO1	protein_coding	chr12	123775778	123775784	123775777	123775805	-	0	0	0	0
hsa-miR-424-5p	ENSG00000139697	SBNO1	protein_coding	chr12	123777354	123777360	123777353	123777381	-	0	0	0	1
hsa-miR-424-5p	ENSG00000139697	SBNO1	protein_coding	chr12	123834952	123834980	123834952	123834980	-	0	0	0	0
hsa-miR-424-5p	ENSG00000111361	EIF2B1	protein_coding	chr12	124106242	124106247	124106242	124106247	-	1	0	0	0
hsa-miR-424-5p	ENSG00000111361	EIF2B1	protein_coding	chr12	124110977	124110983	124110977	124110983	-	0	0	0	1
hsa-miR-424-5p	ENSG00000196498	NCOR2	protein_coding	chr12	124809198	124809204	124809197	124809217	-	1	1	0	1
hsa-miR-424-5p	ENSG00000073060	SCARB1	protein_coding	chr12	125262911	125262914	125262907	125262938	-	2	1	0	0
hsa-miR-424-5p	ENSG00000073060	SCARB1	protein_coding	chr12	125270933	125270961	125270933	125270961	-	0	0	0	0
hsa-miR-424-5p	ENSG00000139370	SLC15A4	protein_coding	chr12	129278148	129278154	129278147	129278175	-	1	1	0	1
hsa-miR-424-5p	ENSG00000139370	SLC15A4	protein_coding	chr12	129308028	129308056	129308028	129308056	-	0	0	0	0
hsa-miR-424-5p	ENSG00000139370	SLC15A4	protein_coding	chr12	129308249	129308277	129308249	129308277	-	0	0	0	0
hsa-miR-424-5p	ENSG00000185163	DDX51	protein_coding	chr12	132622343	132622348	132622343	132622348	-	1	0	0	0
hsa-miR-424-5p	ENSG00000177084	POLE	protein_coding	chr12	133200385	133200390	133200385	133200390	-	1	0	0	0
hsa-miR-424-5p	ENSG00000177084	POLE	protein_coding	chr12	133208940	133208968	133208940	133208968	-	0	0	0	0
hsa-miR-424-5p	ENSG00000090615	GOLGA3	protein_coding	chr12	133349390	133349396	133349390	133349396	-	1	0	0	0
hsa-miR-424-5p	ENSG00000072609	CHFR	protein_coding	chr12	133417317	133417323	133417317	133417323	-	1	0	0	0
hsa-miR-424-5p	ENSG00000072609	CHFR	protein_coding	chr12	133417380	133417386	133417380	133417386	-	1	0	0	0
hsa-miR-424-5p	ENSG00000139044	B4GALNT3	protein_coding	chr12	671929	671932	671926	671935	+	0	0	0	2
hsa-miR-424-5p	ENSG00000082805	ERC1	protein_coding	chr12	1600417	1600422	1600417	1600422	+	1	0	0	0
hsa-miR-424-5p	ENSG00000111186	WNT5B	protein_coding	chr12	1756241	1756244	1756239	1756247	+	2	0	0	0
hsa-miR-424-5p	ENSG00000078246	TULP3	protein_coding	chr12	3049811	3049816	3049811	3049816	+	1	0	0	0
hsa-miR-424-5p	ENSG00000011105	TSPAN9	protein_coding	chr12	3393405	3393411	3393392	3393412	+	1	1	0	1
hsa-miR-424-5p	ENSG00000118971	CCND2	protein_coding	chr12	4409795	4409800	4409773	4409801	+	1	0	1	1
hsa-miR-424-5p	ENSG00000118971	CCND2	protein_coding	chr12	4410868	4410873	4410846	4410874	+	1	0	1	1
hsa-miR-424-5p	ENSG00000118971	CCND2	protein_coding	chr12	4410940	4410945	4410918	4410946	+	1	1	1	1
hsa-miR-424-5p	ENSG00000118971	CCND2	protein_coding	chr12	4411904	4411909	4411882	4411910	+	1	0	0	0
hsa-miR-424-5p	ENSG00000010292	NCAPD2	protein_coding	chr12	6626601	6626629	6626601	6626629	+	0	0	0	0
hsa-miR-424-5p	ENSG00000010292	NCAPD2	protein_coding	chr12	6632442	6632470	6632442	6632470	+	0	0	0	0
hsa-miR-424-5p	ENSG00000010292	NCAPD2	protein_coding	chr12	6634774	6634802	6634774	6634802	+	0	0	0	0
hsa-miR-424-5p	ENSG00000010292	NCAPD2	protein_coding	chr12	6637198	6637226	6637198	6637226	+	0	0	0	0
hsa-miR-424-5p	ENSG00000010292	NCAPD2	protein_coding	chr12	6637931	6637959	6637931	6637959	+	0	0	0	0
hsa-miR-424-5p	ENSG00000111652	COPS7A	protein_coding	chr12	6840789	6840792	6840765	6840796	+	2	1	1	0
hsa-miR-424-5p	ENSG00000110811	P3H3	protein_coding	chr12	6943173	6943174	6943146	6943201	+	0	0	0	0
hsa-miR-424-5p	ENSG00000111674	ENO2	protein_coding	chr12	7032098	7032103	7032098	7032103	+	1	0	0	0
hsa-miR-424-5p	ENSG00000111676	ATN1	protein_coding	chr12	7051045	7051051	7051045	7051051	+	1	0	0	0
hsa-miR-424-5p	ENSG00000139197	PEX5	protein_coding	chr12	7363091	7363094	7363070	7363098	+	1	1	2	1
hsa-miR-424-5p	ENSG00000089818	NECAP1	protein_coding	chr12	8249703	8249708	8249690	8249709	+	1	1	0	0
hsa-miR-424-5p	ENSG00000166532	RIMKLB	protein_coding	chr12	8929683	8929688	8929661	8929689	+	1	1	1	1
hsa-miR-424-5p	ENSG00000069493	CLEC2D	protein_coding	chr12	9848446	9848446	9848439	9848452	+	3	0	0	0
hsa-miR-424-5p	ENSG00000139112	GABARAPL1	protein_coding	chr12	10374629	10374635	10374608	10374636	+	1	1	0	1
hsa-miR-424-5p	ENSG00000139112	GABARAPL1	protein_coding	chr12	10375382	10375388	10375361	10375389	+	1	1	0	0
hsa-miR-424-5p	ENSG00000139112	GABARAPL1	protein_coding	chr12	10375432	10375437	10375410	10375438	+	1	0	0	0
hsa-miR-424-5p	ENSG00000180574	EIF2S3B	protein_coding	chr12	10659470	10659498	10659470	10659498	+	0	0	0	0
hsa-miR-424-5p	ENSG00000111269	CREBL2	protein_coding	chr12	12795890	12795895	12795868	12795896	+	1	0	0	0
hsa-miR-424-5p	ENSG00000111269	CREBL2	protein_coding	chr12	12796345	12796350	12796323	12796351	+	1	0	0	1
hsa-miR-424-5p	ENSG00000111269	CREBL2	protein_coding	chr12	12797343	12797371	12797343	12797371	+	0	0	0	0
hsa-miR-424-5p	ENSG00000013588	GPRC5A	protein_coding	chr12	13068847	13068853	13068847	13068853	+	0	0	0	0
hsa-miR-424-5p	ENSG00000013588	GPRC5A	protein_coding	chr12	13070135	13070141	13070122	13070142	+	0	0	0	0
hsa-miR-424-5p	ENSG00000084444	FAM234B	protein_coding	chr12	13221309	13221328	13221309	13221328	+	0	1	0	0
hsa-miR-424-5p	ENSG00000246705	H2AFJ	protein_coding	chr12	14928411	14928416	14928411	14928416	+	1	0	0	0
hsa-miR-424-5p	ENSG00000023697	DERA	protein_coding	chr12	16190052	16190057	16190052	16190057	+	1	0	0	0
hsa-miR-424-5p	ENSG00000008394	MGST1	protein_coding	chr12	16500605	16500625	16500605	16500625	+	0	0	0	0
hsa-miR-424-5p	ENSG00000052126	PLEKHA5	protein_coding	chr12	19528687	19528693	19528672	19528694	+	1	1	0	1
hsa-miR-424-5p	ENSG00000139154	AEBP2	protein_coding	chr12	19592782	19592810	19592782	19592810	+	0	0	0	0
hsa-miR-424-5p	ENSG00000139154	AEBP2	protein_coding	chr12	19671357	19671363	19671336	19671374	+	1	1	0	1
hsa-miR-424-5p	ENSG00000139154	AEBP2	protein_coding	chr12	19671368	19671373	19671368	19671373	+	1	0	0	0
hsa-miR-424-5p	ENSG00000139154	AEBP2	protein_coding	chr12	19673340	19673347	19673327	19673348	+	1	1	0	0
hsa-miR-424-5p	ENSG00000111711	GOLT1B	protein_coding	chr12	21670993	21670999	21670976	21671000	+	1	1	0	1
hsa-miR-424-5p	ENSG00000139163	ETNK1	protein_coding	chr12	22842708	22842714	22842708	22842715	+	1	0	0	1
hsa-miR-424-5p	ENSG00000139163	ETNK1	protein_coding	chr12	22843095	22843101	22843080	22843102	+	1	1	1	1
hsa-miR-424-5p	ENSG00000205707	ETFRF1	protein_coding	chr12	25357860	25357860	25357836	25357866	+	3	1	2	0
hsa-miR-424-5p	ENSG00000123094	RASSF8	protein_coding	chr12	26223255	26223261	26223234	26223262	+	0	1	1	1
hsa-miR-424-5p	ENSG00000123094	RASSF8	protein_coding	chr12	26225281	26225287	26225260	26225288	+	0	1	1	1
hsa-miR-424-5p	ENSG00000211455	STK38L	protein_coding	chr12	27476260	27476265	27476238	27476266	+	1	0	0	0
hsa-miR-424-5p	ENSG00000211455	STK38L	protein_coding	chr12	27477008	27477011	27476987	27477015	+	2	0	0	0
hsa-miR-424-5p	ENSG00000211455	STK38L	protein_coding	chr12	27478693	27478699	27478672	27478700	+	0	1	0	0
hsa-miR-424-5p	ENSG00000013573	DDX11	protein_coding	chr12	31255217	31255223	31255196	31255224	+	0	0	0	0
hsa-miR-424-5p	ENSG00000151746	BICD1	protein_coding	chr12	32531189	32531195	32531168	32531196	+	0	0	0	1
hsa-miR-424-5p	ENSG00000151746	BICD1	protein_coding	chr12	32531399	32531405	32531378	32531406	+	0	0	0	0
hsa-miR-424-5p	ENSG00000087470	DNM1L	protein_coding	chr12	32866227	32866248	32866220	32866248	+	0	1	0	0
hsa-miR-424-5p	ENSG00000087470	DNM1L	protein_coding	chr12	32875406	32875428	32875400	32875428	+	0	1	0	0
hsa-miR-424-5p	ENSG00000087470	DNM1L	protein_coding	chr12	32896676	32896704	32896676	32896704	+	0	0	0	0
hsa-miR-424-5p	ENSG00000139133	ALG10	protein_coding	chr12	34179737	34179759	34179737	34179759	+	0	0	0	0
hsa-miR-424-5p	ENSG00000198001	IRAK4	protein_coding	chr12	44180895	44180900	44180895	44180900	+	1	0	0	0
hsa-miR-424-5p	ENSG00000152556	PFKM	protein_coding	chr12	48534540	48534568	48534540	48534568	+	0	0	0	0
hsa-miR-424-5p	ENSG00000123352	SPATS2	protein_coding	chr12	49918535	49918557	49918535	49918557	+	0	0	0	0
hsa-miR-424-5p	ENSG00000139644	TMBIM6	protein_coding	chr12	50158042	50158047	50158042	50158047	+	1	0	0	0
hsa-miR-424-5p	ENSG00000110881	ASIC1	protein_coding	chr12	50476103	50476108	50476103	50476108	+	1	0	0	0
hsa-miR-424-5p	ENSG00000196876	SCN8A	protein_coding	chr12	52180357	52180379	52180357	52180379	+	0	1	0	0
hsa-miR-424-5p	ENSG00000196876	SCN8A	protein_coding	chr12	52202211	52202217	52202197	52202218	+	1	1	0	1
hsa-miR-424-5p	ENSG00000196876	SCN8A	protein_coding	chr12	52206313	52206319	52206312	52206319	+	0	0	1	1
hsa-miR-424-5p	ENSG00000260415	SCN8A	protein_coding	chr12	52206313	52206319	52206312	52206319	+	0	0	1	1
hsa-miR-424-5p	ENSG00000135503	ACVR1B	protein_coding	chr12	52369219	52369247	52369219	52369247	+	0	0	0	0
hsa-miR-424-5p	ENSG00000135503	ACVR1B	protein_coding	chr12	52374946	52374974	52374946	52374974	+	0	0	0	0
hsa-miR-424-5p	ENSG00000135503	ACVR1B	protein_coding	chr12	52377880	52377908	52377880	52377908	+	0	0	0	0
hsa-miR-424-5p	ENSG00000123358	NR4A1	protein_coding	chr12	52453019	52453025	52453003	52453026	+	1	1	0	0
hsa-miR-424-5p	ENSG00000063046	EIF4B	protein_coding	chr12	53433929	53433957	53433929	53433957	+	0	0	0	0
hsa-miR-424-5p	ENSG00000063046	EIF4B	protein_coding	chr12	53434164	53434170	53434143	53434171	+	1	1	1	1
hsa-miR-424-5p	ENSG00000063046	EIF4B	protein_coding	chr12	53435025	53435030	53435003	53435031	+	1	0	0	0
hsa-miR-424-5p	ENSG00000139651	ZNF740	protein_coding	chr12	53582355	53582360	53582355	53582360	+	1	0	0	0
hsa-miR-424-5p	ENSG00000135476	ESPL1	protein_coding	chr12	53663026	53663054	53663026	53663054	+	0	0	0	0
hsa-miR-424-5p	ENSG00000135476	ESPL1	protein_coding	chr12	53663107	53663135	53663107	53663135	+	0	0	0	0
hsa-miR-424-5p	ENSG00000135476	ESPL1	protein_coding	chr12	53663601	53663629	53663601	53663629	+	0	0	0	0
hsa-miR-424-5p	ENSG00000135476	ESPL1	protein_coding	chr12	53671626	53671654	53671626	53671654	+	0	0	0	0
hsa-miR-424-5p	ENSG00000185591	SP1	protein_coding	chr12	53776385	53776413	53776385	53776413	+	0	0	0	0
hsa-miR-424-5p	ENSG00000185591	SP1	protein_coding	chr12	53777267	53777295	53777267	53777295	+	0	0	0	0
hsa-miR-424-5p	ENSG00000185591	SP1	protein_coding	chr12	53805967	53805972	53805945	53805973	+	1	0	0	0
hsa-miR-424-5p	ENSG00000185591	SP1	protein_coding	chr12	53807648	53807653	53807626	53807654	+	1	0	0	0
hsa-miR-424-5p	ENSG00000205352	PRR13	protein_coding	chr12	53840037	53840040	53840022	53840044	+	2	1	0	0
hsa-miR-424-5p	ENSG00000197111	PCBP2	protein_coding	chr12	53854716	53854738	53854716	53854738	+	0	1	0	0
hsa-miR-424-5p	ENSG00000139546	TARBP2	protein_coding	chr12	53898953	53898974	53898953	53898974	+	0	1	0	0
hsa-miR-424-5p	ENSG00000139546	TARBP2	protein_coding	chr12	53900195	53900201	53900180	53900202	+	1	1	0	0
hsa-miR-424-5p	ENSG00000123364	HOXC13	protein_coding	chr12	54339806	54339811	54339806	54339811	+	1	0	0	0
hsa-miR-424-5p	ENSG00000123388	HOXC11	protein_coding	chr12	54369507	54369513	54369486	54369514	+	1	1	1	1
hsa-miR-424-5p	ENSG00000135486	HNRNPA1	protein_coding	chr12	54678435	54678440	54678435	54678441	+	1	0	1	1
hsa-miR-424-5p	ENSG00000111481	COPZ1	protein_coding	chr12	54744240	54744246	54744240	54744246	+	0	0	0	0
hsa-miR-424-5p	ENSG00000170515	PA2G4	protein_coding	chr12	56506695	56506701	56506681	56506702	+	1	1	0	0
hsa-miR-424-5p	ENSG00000139641	ESYT1	protein_coding	chr12	56538360	56538365	56538360	56538365	+	1	0	0	0
hsa-miR-424-5p	ENSG00000092841	MYL6	protein_coding	chr12	56554948	56554954	56554927	56554955	+	0	1	0	1
hsa-miR-424-5p	ENSG00000092841	MYL6	protein_coding	chr12	56554978	56554983	56554956	56554984	+	0	0	0	0
hsa-miR-424-5p	ENSG00000123384	LRP1	protein_coding	chr12	57522749	57522777	57522749	57522777	+	0	0	0	0
hsa-miR-424-5p	ENSG00000123384	LRP1	protein_coding	chr12	57539161	57539189	57539161	57539189	+	0	0	0	0
hsa-miR-424-5p	ENSG00000182379	NXPH4	protein_coding	chr12	57620155	57620161	57620141	57620162	+	1	1	0	0
hsa-miR-424-5p	ENSG00000155980	KIF5A	protein_coding	chr12	57978160	57978162	57978135	57978166	+	2	1	1	1
hsa-miR-424-5p	ENSG00000166908	PIP4K2C	protein_coding	chr12	57987821	57987849	57987821	57987849	+	0	0	0	0
hsa-miR-424-5p	ENSG00000166908	PIP4K2C	protein_coding	chr12	57996172	57996178	57996151	57996179	+	1	1	0	1
hsa-miR-424-5p	ENSG00000166908	PIP4K2C	protein_coding	chr12	57996796	57996801	57996774	57996802	+	1	0	0	0
hsa-miR-424-5p	ENSG00000135506	OS9	protein_coding	chr12	58113995	58114021	58113995	58114021	+	0	0	0	0
hsa-miR-424-5p	ENSG00000135506	OS9	protein_coding	chr12	58114855	58114861	58114855	58114861	+	1	0	0	1
hsa-miR-424-5p	ENSG00000139266	2019-03-09	protein_coding	chr12	58152740	58152745	58152740	58152746	+	1	0	1	0
hsa-miR-424-5p	ENSG00000139266	2019-03-09	protein_coding	chr12	58153346	58153351	58153346	58153352	+	1	0	1	1
hsa-miR-424-5p	ENSG00000123427	EEF1AKMT3	protein_coding	chr12	58174230	58174236	58174209	58174237	+	1	0	0	1
hsa-miR-424-5p	ENSG00000123297	TSFM	protein_coding	chr12	58190611	58190617	58190595	58190618	+	0	1	0	0
hsa-miR-424-5p	ENSG00000118596	SLC16A7	protein_coding	chr12	60175819	60175824	60175819	60175824	+	0	0	0	0
hsa-miR-424-5p	ENSG00000135655	USP15	protein_coding	chr12	62785636	62785664	62785636	62785664	+	0	0	0	0
hsa-miR-424-5p	ENSG00000135655	USP15	protein_coding	chr12	62798422	62798428	62798401	62798429	+	1	1	1	1
hsa-miR-424-5p	ENSG00000135655	USP15	protein_coding	chr12	62799365	62799371	62799344	62799372	+	1	1	1	1
hsa-miR-424-5p	ENSG00000135655	USP15	protein_coding	chr12	62799739	62799744	62799717	62799745	+	1	0	0	0
hsa-miR-424-5p	ENSG00000061987	MON2	protein_coding	chr12	62892737	62892762	62892734	62892765	+	0	0	0	0
hsa-miR-424-5p	ENSG00000196935	SRGAP1	protein_coding	chr12	64519820	64519848	64519820	64519848	+	0	0	0	0
hsa-miR-424-5p	ENSG00000196935	SRGAP1	protein_coding	chr12	64539217	64539223	64539196	64539224	+	0	0	0	1
hsa-miR-424-5p	ENSG00000196935	SRGAP1	protein_coding	chr12	64541362	64541368	64541341	64541369	+	0	0	0	0
hsa-miR-424-5p	ENSG00000184575	XPOT	protein_coding	chr12	64827241	64827262	64827241	64827262	+	0	0	0	0
hsa-miR-424-5p	ENSG00000183735	TBK1	protein_coding	chr12	64895329	64895334	64895314	64895335	+	1	1	0	0
hsa-miR-424-5p	ENSG00000153179	RASSF3	protein_coding	chr12	65088769	65088774	65088769	65088774	+	1	0	0	0
hsa-miR-424-5p	ENSG00000174099	MSRB3	protein_coding	chr12	65858965	65858970	65858965	65858970	+	1	0	0	0
hsa-miR-424-5p	ENSG00000149948	HMGA2	protein_coding	chr12	66358375	66358380	66358360	66358381	+	1	1	1	1
hsa-miR-424-5p	ENSG00000149948	HMGA2	protein_coding	chr12	66359268	66359273	66359268	66359273	+	1	0	0	0
hsa-miR-424-5p	ENSG00000127311	HELB	protein_coding	chr12	66716515	66716536	66716515	66716536	+	0	1	0	0
hsa-miR-424-5p	ENSG00000111530	CAND1	protein_coding	chr12	67709120	67709125	67709120	67709125	+	0	0	0	0
hsa-miR-424-5p	ENSG00000127334	DYRK2	protein_coding	chr12	68056263	68056269	68056249	68056270	+	1	1	1	1
hsa-miR-424-5p	ENSG00000111605	CPSF6	protein_coding	chr12	69665424	69665430	69665411	69665431	+	0	1	0	0
hsa-miR-424-5p	ENSG00000111605	CPSF6	protein_coding	chr12	69665870	69665876	69665870	69665876	+	0	0	0	0
hsa-miR-424-5p	ENSG00000166225	FRS2	protein_coding	chr12	69968624	69968652	69968624	69968652	+	0	0	0	0
hsa-miR-424-5p	ENSG00000166225	FRS2	protein_coding	chr12	69971566	69971572	69971545	69971573	+	1	1	0	1
hsa-miR-424-5p	ENSG00000166225	FRS2	protein_coding	chr12	69973457	69973462	69973435	69973463	+	1	0	0	0
hsa-miR-424-5p	ENSG00000166226	CCT2	protein_coding	chr12	69987313	69987333	69987313	69987333	+	0	1	0	0
hsa-miR-424-5p	ENSG00000127328	RAB3IP	protein_coding	chr12	70209731	70209737	70209710	70209738	+	1	0	0	0
hsa-miR-424-5p	ENSG00000127328	RAB3IP	protein_coding	chr12	70211356	70211384	70211356	70211384	+	0	0	0	0
hsa-miR-424-5p	ENSG00000127328	RAB3IP	protein_coding	chr12	70215469	70215474	70215447	70215475	+	1	0	0	0
hsa-miR-424-5p	ENSG00000127328	RAB3IP	protein_coding	chr12	70215777	70215783	70215756	70215784	+	1	0	0	0
hsa-miR-424-5p	ENSG00000173451	THAP2	protein_coding	chr12	72073210	72073216	72073196	72073217	+	1	1	0	0
hsa-miR-424-5p	ENSG00000253719	ATXN7L3B	protein_coding	chr12	74933630	74933636	74933609	74933637	+	0	1	1	1
hsa-miR-424-5p	ENSG00000253719	ATXN7L3B	protein_coding	chr12	74933755	74933761	74933734	74933762	+	0	0	1	1
hsa-miR-424-5p	ENSG00000253719	ATXN7L3B	protein_coding	chr12	74935170	74935175	74935148	74935176	+	0	0	0	0
hsa-miR-424-5p	ENSG00000139278	GLIPR1	protein_coding	chr12	75893108	75893114	75893095	75893115	+	1	1	0	0
hsa-miR-424-5p	ENSG00000186908	ZDHHC17	protein_coding	chr12	77246206	77246211	77246191	77246212	+	1	1	0	0
hsa-miR-424-5p	ENSG00000165899	OTOGL	protein_coding	chr12	80772816	80772819	80772800	80772823	+	2	1	1	2
hsa-miR-424-5p	ENSG00000180318	ALX1	protein_coding	chr12	85695333	85695338	85695318	85695339	+	1	1	0	0
hsa-miR-424-5p	ENSG00000139324	TMTC3	protein_coding	chr12	88589354	88589382	88589354	88589382	+	0	0	0	0
hsa-miR-424-5p	ENSG00000136040	PLXNC1	protein_coding	chr12	94699120	94699125	94699120	94699125	+	1	0	0	0
hsa-miR-424-5p	ENSG00000028203	VEZT	protein_coding	chr12	95693464	95693481	95693464	95693481	+	0	1	0	0
hsa-miR-424-5p	ENSG00000111142	METAP2	protein_coding	chr12	95909015	95909020	95909015	95909020	+	1	0	0	0
hsa-miR-424-5p	ENSG00000139344	AMDHD1	protein_coding	chr12	96354371	96354399	96354371	96354399	+	0	0	0	0
hsa-miR-424-5p	ENSG00000120868	APAF1	protein_coding	chr12	99127589	99127594	99127589	99127594	+	1	0	0	0
hsa-miR-424-5p	ENSG00000139354	GAS2L3	protein_coding	chr12	101019189	101019195	101019189	101019195	+	0	0	0	1
hsa-miR-424-5p	ENSG00000111666	CHPT1	protein_coding	chr12	102122754	102122757	102122737	102122760	+	2	1	1	2
hsa-miR-424-5p	ENSG00000136048	DRAM1	protein_coding	chr12	102315726	102315733	102315713	102315734	+	1	1	0	0
hsa-miR-424-5p	ENSG00000136011	STAB2	protein_coding	chr12	104152997	104153021	104152997	104153021	+	0	0	0	0
hsa-miR-424-5p	ENSG00000136051	WASHC4	protein_coding	chr12	105561368	105561373	105561368	105561373	+	1	0	0	0
hsa-miR-424-5p	ENSG00000013503	POLR3B	protein_coding	chr12	106903556	106903561	106903556	106903561	+	1	0	0	0
hsa-miR-424-5p	ENSG00000111785	RIC8B	protein_coding	chr12	107245323	107245342	107245314	107245342	+	0	1	0	0
hsa-miR-424-5p	ENSG00000111785	RIC8B	protein_coding	chr12	107280251	107280279	107280251	107280279	+	0	0	0	0
hsa-miR-424-5p	ENSG00000198855	FICD	protein_coding	chr12	108910847	108910875	108910847	108910875	+	0	0	0	0
hsa-miR-424-5p	ENSG00000198855	FICD	protein_coding	chr12	108914490	108914496	108914469	108914497	+	0	0	0	1
hsa-miR-424-5p	ENSG00000076248	UNG	protein_coding	chr12	109547781	109547809	109547781	109547809	+	0	0	0	0
hsa-miR-424-5p	ENSG00000076248	UNG	protein_coding	chr12	109548118	109548124	109548097	109548125	+	1	0	0	1
hsa-miR-424-5p	ENSG00000076555	ACACB	protein_coding	chr12	109704294	109704299	109704294	109704299	+	1	0	0	0
hsa-miR-424-5p	ENSG00000076555	ACACB	protein_coding	chr12	109705886	109705892	109705873	109705893	+	1	1	0	1
hsa-miR-424-5p	ENSG00000076555	ACACB	protein_coding	chr12	109705961	109705966	109705961	109705966	+	1	0	0	0
hsa-miR-424-5p	ENSG00000151148	UBE3B	protein_coding	chr12	109973191	109973196	109973191	109973196	+	1	0	0	0
hsa-miR-424-5p	ENSG00000174437	ATP2A2	protein_coding	chr12	110782716	110782723	110782695	110782744	+	0	0	0	0
hsa-miR-424-5p	ENSG00000174437	ATP2A2	protein_coding	chr12	110784181	110784209	110784181	110784209	+	0	0	0	0
hsa-miR-424-5p	ENSG00000204852	TCTN1	protein_coding	chr12	111066692	111066715	111066687	111066715	+	0	1	0	0
hsa-miR-424-5p	ENSG00000111252	SH2B3	protein_coding	chr12	111887456	111887461	111887456	111887461	+	1	0	0	0
hsa-miR-424-5p	ENSG00000111275	ALDH2	protein_coding	chr12	112221029	112221057	112221029	112221057	+	0	0	0	0
hsa-miR-424-5p	ENSG00000257767	AC002996.1	protein_coding	chr12	112221029	112221057	112221029	112221057	+	0	0	0	0
hsa-miR-424-5p	ENSG00000111275	ALDH2	protein_coding	chr12	112230434	112230462	112230434	112230462	+	0	0	0	0
hsa-miR-424-5p	ENSG00000111275	ALDH2	protein_coding	chr12	112235947	112235953	112235925	112235975	+	0	0	0	0
hsa-miR-424-5p	ENSG00000111275	ALDH2	protein_coding	chr12	112247774	112247779	112247774	112247779	+	1	0	0	0
hsa-miR-424-5p	ENSG00000089022	MAPKAPK5	protein_coding	chr12	112330975	112330980	112330960	112330981	+	1	1	0	0
hsa-miR-424-5p	ENSG00000135148	TRAFD1	protein_coding	chr12	112590813	112590818	112590813	112590818	+	1	0	0	0
hsa-miR-424-5p	ENSG00000135148	TRAFD1	protein_coding	chr12	112591161	112591166	112591161	112591166	+	1	0	0	0
hsa-miR-424-5p	ENSG00000179295	PTPN11	protein_coding	chr12	112945002	112945007	112945002	112945007	+	1	0	0	0
hsa-miR-424-5p	ENSG00000111331	OAS3	protein_coding	chr12	113376458	113376486	113376458	113376486	+	0	0	0	0
hsa-miR-424-5p	ENSG00000111331	OAS3	protein_coding	chr12	113408075	113408081	113408054	113408082	+	1	0	0	0
hsa-miR-424-5p	ENSG00000111331	OAS3	protein_coding	chr12	113409768	113409796	113409768	113409796	+	0	0	0	0
hsa-miR-424-5p	ENSG00000111335	OAS2	protein_coding	chr12	113425208	113425214	113425195	113425215	+	1	1	0	0
hsa-miR-424-5p	ENSG00000151176	PLBD2	protein_coding	chr12	113826448	113826454	113826448	113826454	+	1	0	0	0
hsa-miR-424-5p	ENSG00000151176	PLBD2	protein_coding	chr12	113826696	113826702	113826682	113826703	+	1	1	0	0
hsa-miR-424-5p	ENSG00000135127	BICDL1	protein_coding	chr12	120532045	120532050	120532045	120532050	+	1	0	0	0
hsa-miR-424-5p	ENSG00000089163	SIRT4	protein_coding	chr12	120750889	120750895	120750868	120750896	+	1	1	0	1
hsa-miR-424-5p	ENSG00000257218	GATC	protein_coding	chr12	120898897	120898900	120898873	120898904	+	0	0	0	0
hsa-miR-424-5p	ENSG00000022840	RNF10	protein_coding	chr12	121014541	121014546	121014519	121014547	+	1	1	0	0
hsa-miR-424-5p	ENSG00000022840	RNF10	protein_coding	chr12	121015316	121015322	121015295	121015323	+	1	1	0	0
hsa-miR-424-5p	ENSG00000110917	MLEC	protein_coding	chr12	121137446	121137451	121137446	121137451	+	1	0	0	0
hsa-miR-424-5p	ENSG00000110917	MLEC	protein_coding	chr12	121138071	121138076	121138071	121138076	+	1	0	0	0
hsa-miR-424-5p	ENSG00000110917	MLEC	protein_coding	chr12	121139323	121139328	121139323	121139328	+	1	0	0	0
hsa-miR-424-5p	ENSG00000175970	UNC119B	protein_coding	chr12	121158444	121158447	121158420	121158451	+	2	0	0	0
hsa-miR-424-5p	ENSG00000175970	UNC119B	protein_coding	chr12	121159104	121159109	121159082	121159110	+	1	0	0	0
hsa-miR-424-5p	ENSG00000175970	UNC119B	protein_coding	chr12	121159360	121159366	121159339	121159367	+	1	0	0	0
hsa-miR-424-5p	ENSG00000175970	UNC119B	protein_coding	chr12	121160105	121160111	121160084	121160112	+	1	0	0	0
hsa-miR-424-5p	ENSG00000175970	UNC119B	protein_coding	chr12	121160160	121160165	121160138	121160166	+	1	0	0	0
hsa-miR-424-5p	ENSG00000175970	UNC119B	protein_coding	chr12	121161086	121161092	121161065	121161093	+	1	0	0	0
hsa-miR-424-5p	ENSG00000135100	HNF1A	protein_coding	chr12	121440161	121440167	121440161	121440167	+	1	0	0	0
hsa-miR-424-5p	ENSG00000139718	SETD1B	protein_coding	chr12	122268501	122268506	122268487	122268507	+	0	1	1	1
hsa-miR-424-5p	ENSG00000139718	SETD1B	protein_coding	chr12	122269660	122269665	122269660	122269665	+	0	0	0	0
hsa-miR-424-5p	ENSG00000110801	PSMD9	protein_coding	chr12	122354684	122354705	122354684	122354705	+	0	1	0	0
hsa-miR-424-5p	ENSG00000110987	BCL7A	protein_coding	chr12	122497362	122497365	122497341	122497369	+	2	1	0	1
hsa-miR-424-5p	ENSG00000175727	MLXIP	protein_coding	chr12	122628353	122628359	122628353	122628359	+	1	0	0	0
hsa-miR-424-5p	ENSG00000139726	DENR	protein_coding	chr12	123253936	123253941	123253914	123253942	+	1	0	0	0
hsa-miR-424-5p	ENSG00000139726	DENR	protein_coding	chr12	123255454	123255457	123255433	123255461	+	2	1	0	0
hsa-miR-424-5p	ENSG00000130787	HIP1R	protein_coding	chr12	123334458	123334478	123334458	123334478	+	0	0	0	0
hsa-miR-424-5p	ENSG00000183955	KMT5A	protein_coding	chr12	123893109	123893114	123893109	123893114	+	1	0	0	0
hsa-miR-424-5p	ENSG00000183955	KMT5A	protein_coding	chr12	123893376	123893381	123893376	123893381	+	1	0	0	0
hsa-miR-424-5p	ENSG00000179195	ZNF664	protein_coding	chr12	124498833	124498838	124498819	124498839	+	1	0	0	0
hsa-miR-424-5p	ENSG00000184992	BRI3BP	protein_coding	chr12	125478383	125478390	125478362	125478411	+	0	0	0	0
hsa-miR-424-5p	ENSG00000184992	BRI3BP	protein_coding	chr12	125510942	125510948	125510921	125510949	+	0	0	0	1
hsa-miR-424-5p	ENSG00000184992	BRI3BP	protein_coding	chr12	125511515	125511543	125511515	125511543	+	0	0	0	0
hsa-miR-424-5p	ENSG00000081760	AACS	protein_coding	chr12	125627276	125627281	125627276	125627281	+	1	0	0	0
hsa-miR-424-5p	ENSG00000151948	GLT1D1	protein_coding	chr12	129469315	129469321	129469294	129469322	+	1	1	0	0
hsa-miR-424-5p	ENSG00000111432	FZD10	protein_coding	chr12	130650257	130650284	130650257	130650285	+	0	1	0	0
hsa-miR-424-5p	ENSG00000177169	ULK1	protein_coding	chr12	132406828	132406833	132406828	132406833	+	1	0	0	0
hsa-miR-424-5p	ENSG00000247077	PGAM5	protein_coding	chr12	133295497	133295504	133295497	133295504	+	1	0	0	0
hsa-miR-424-5p	ENSG00000247077	PGAM5	protein_coding	chr12	133295508	133295513	133295508	133295513	+	1	0	0	0
hsa-miR-424-5p	ENSG00000256223	ZNF10	protein_coding	chr12	133734690	133734696	133734675	133734697	+	1	1	0	0
hsa-miR-424-5p	ENSG00000256223	ZNF10	protein_coding	chr12	133735261	133735266	133735261	133735266	+	1	0	0	0
hsa-miR-424-5p	ENSG00000132953	XPO4	protein_coding	chr13	21356876	21356881	21356875	21356881	-	1	0	1	1
hsa-miR-424-5p	ENSG00000150457	LATS2	protein_coding	chr13	21548449	21548454	21548448	21548476	-	1	1	0	0
hsa-miR-424-5p	ENSG00000150457	LATS2	protein_coding	chr13	21548677	21548683	21548676	21548704	-	1	1	1	1
hsa-miR-424-5p	ENSG00000150457	LATS2	protein_coding	chr13	21549415	21549443	21549415	21549443	-	0	0	0	0
hsa-miR-424-5p	ENSG00000165480	SKA3	protein_coding	chr13	21727926	21727931	21727926	21727931	-	1	0	0	0
hsa-miR-424-5p	ENSG00000180730	SHISA2	protein_coding	chr13	26619487	26619492	26619487	26619492	-	1	0	0	0
hsa-miR-424-5p	ENSG00000152484	USP12	protein_coding	chr13	27641699	27641704	27641699	27641704	-	0	0	0	0
hsa-miR-424-5p	ENSG00000152484	USP12	protein_coding	chr13	27641798	27641803	27641797	27641804	-	0	0	1	1
hsa-miR-424-5p	ENSG00000139508	SLC46A3	protein_coding	chr13	29275078	29275083	29275078	29275083	-	1	0	0	0
hsa-miR-424-5p	ENSG00000139514	SLC7A1	protein_coding	chr13	30087107	30087113	30087106	30087134	-	1	1	0	0
hsa-miR-424-5p	ENSG00000139514	SLC7A1	protein_coding	chr13	30087829	30087835	30087828	30087856	-	1	0	0	1
hsa-miR-424-5p	ENSG00000122042	UBL3	protein_coding	chr13	30341342	30341348	30341341	30341369	-	1	1	0	1
hsa-miR-424-5p	ENSG00000102781	KATNAL1	protein_coding	chr13	30776846	30776852	30776845	30776866	-	1	1	0	1
hsa-miR-424-5p	ENSG00000133121	STARD13	protein_coding	chr13	33679203	33679209	33679202	33679230	-	1	0	0	0
hsa-miR-424-5p	ENSG00000133083	DCLK1	protein_coding	chr13	36348464	36348469	36348463	36348491	-	1	1	1	1
hsa-miR-424-5p	ENSG00000150907	FOXO1	protein_coding	chr13	41132964	41132970	41132963	41132991	-	1	1	0	1
hsa-miR-424-5p	ENSG00000120658	ENOX1	protein_coding	chr13	43918849	43918873	43918849	43918873	-	0	0	0	0
hsa-miR-424-5p	ENSG00000102804	TSC22D1	protein_coding	chr13	45007896	45007901	45007895	45007923	-	1	1	0	0
hsa-miR-424-5p	ENSG00000102804	TSC22D1	protein_coding	chr13	45008732	45008760	45008732	45008760	-	0	0	0	0
hsa-miR-424-5p	ENSG00000102804	TSC22D1	protein_coding	chr13	45149079	45149107	45149079	45149107	-	0	0	0	0
hsa-miR-424-5p	ENSG00000102804	TSC22D1	protein_coding	chr13	45149169	45149197	45149169	45149197	-	0	0	0	0
hsa-miR-424-5p	ENSG00000133112	TPT1	protein_coding	chr13	45910539	45910546	45910539	45910546	-	0	0	0	1
hsa-miR-424-5p	ENSG00000123200	ZC3H13	protein_coding	chr13	46536377	46536383	46536376	46536397	-	1	1	0	0
hsa-miR-424-5p	ENSG00000136167	LCP1	protein_coding	chr13	46700216	46700222	46700215	46700239	-	1	1	0	0
hsa-miR-424-5p	ENSG00000102445	RUBCNL	protein_coding	chr13	46917291	46917296	46917290	46917311	-	1	1	1	1
hsa-miR-424-5p	ENSG00000102445	RUBCNL	protein_coding	chr13	46919640	46919645	46919640	46919645	-	0	0	0	0
hsa-miR-424-5p	ENSG00000102753	KPNA3	protein_coding	chr13	50273472	50273477	50273471	50273492	-	1	1	1	1
hsa-miR-424-5p	ENSG00000123178	SPRYD7	protein_coding	chr13	50488086	50488092	50488085	50488107	-	1	1	0	0
hsa-miR-424-5p	ENSG00000102786	INTS6	protein_coding	chr13	52023948	52023954	52023947	52023968	-	1	1	0	0
hsa-miR-424-5p	ENSG00000136100	VPS36	protein_coding	chr13	52988598	52988605	52988598	52988605	-	1	0	0	0
hsa-miR-424-5p	ENSG00000184226	PCDH9	protein_coding	chr13	66878504	66878509	66878503	66878531	-	1	1	1	1
hsa-miR-424-5p	ENSG00000276644	DACH1	protein_coding	chr13	72014521	72014527	72014520	72014548	-	1	1	1	1
hsa-miR-424-5p	ENSG00000118922	KLF12	protein_coding	chr13	74263328	74263333	74263328	74263333	-	1	0	0	0
hsa-miR-424-5p	ENSG00000178695	KCTD12	protein_coding	chr13	77458454	77458459	77458454	77458459	-	1	0	0	0
hsa-miR-424-5p	ENSG00000178695	KCTD12	protein_coding	chr13	77458548	77458551	77458545	77458553	-	2	0	0	0
hsa-miR-424-5p	ENSG00000178695	KCTD12	protein_coding	chr13	77459112	77459117	77459112	77459117	-	1	0	0	0
hsa-miR-424-5p	ENSG00000152192	POU4F1	protein_coding	chr13	79174786	79174791	79174786	79174791	-	1	0	0	0
hsa-miR-424-5p	ENSG00000184564	SLITRK6	protein_coding	chr13	86367390	86367396	86367389	86367417	-	1	1	0	1
hsa-miR-424-5p	ENSG00000134874	DZIP1	protein_coding	chr13	96234260	96234263	96234256	96234287	-	2	0	0	1
hsa-miR-424-5p	ENSG00000139800	ZIC5	protein_coding	chr13	100617143	100617148	100617143	100617148	-	1	0	0	0
hsa-miR-424-5p	ENSG00000125247	TMTC4	protein_coding	chr13	101256444	101256449	101256444	101256449	-	1	0	0	0
hsa-miR-424-5p	ENSG00000125266	EFNB2	protein_coding	chr13	107144257	107144262	107144256	107144262	-	1	0	1	1
hsa-miR-424-5p	ENSG00000125266	EFNB2	protein_coding	chr13	107144619	107144625	107144619	107144625	-	1	0	0	0
hsa-miR-424-5p	ENSG00000185950	IRS2	protein_coding	chr13	110406299	110406305	110406298	110406326	-	1	1	0	0
hsa-miR-424-5p	ENSG00000185950	IRS2	protein_coding	chr13	110408069	110408074	110408068	110408096	-	1	0	0	0
hsa-miR-424-5p	ENSG00000185950	IRS2	protein_coding	chr13	110408562	110408567	110408561	110408589	-	1	0	0	0
hsa-miR-424-5p	ENSG00000185950	IRS2	protein_coding	chr13	110435993	110436021	110435993	110436021	-	0	0	0	0
hsa-miR-424-5p	ENSG00000187498	COL4A1	protein_coding	chr13	110801338	110801343	110801337	110801358	-	1	1	0	0
hsa-miR-424-5p	ENSG00000187498	COL4A1	protein_coding	chr13	110802137	110802142	110802137	110802142	-	1	0	0	0
hsa-miR-424-5p	ENSG00000134905	CARS2	protein_coding	chr13	111293791	111293796	111293791	111293796	-	1	0	0	0
hsa-miR-424-5p	ENSG00000134905	CARS2	protein_coding	chr13	111315341	111315347	111315341	111315347	-	0	0	0	0
hsa-miR-424-5p	ENSG00000126226	PCID2	protein_coding	chr13	113832229	113832234	113832229	113832234	-	1	0	0	0
hsa-miR-424-5p	ENSG00000150401	DCUN1D2	protein_coding	chr13	114112143	114112148	114112143	114112148	-	1	0	0	0
hsa-miR-424-5p	ENSG00000121741	ZMYM2	protein_coding	chr13	20660204	20660209	20660182	20660210	+	1	1	1	1
hsa-miR-424-5p	ENSG00000102678	FGF9	protein_coding	chr13	22277728	22277730	22277713	22277734	+	0	1	2	1
hsa-miR-424-5p	ENSG00000127863	TNFRSF19	protein_coding	chr13	24249817	24249822	24249817	24249822	+	1	0	0	0
hsa-miR-424-5p	ENSG00000139496	NUP58	protein_coding	chr13	25909665	25909670	25909665	25909671	+	0	0	0	1
hsa-miR-424-5p	ENSG00000139496	NUP58	protein_coding	chr13	25909754	25909759	25909754	25909759	+	0	0	0	0
hsa-miR-424-5p	ENSG00000132964	CDK8	protein_coding	chr13	26978901	26978907	26978901	26978907	+	0	0	0	1
hsa-miR-424-5p	ENSG00000132970	WASF3	protein_coding	chr13	27261694	27261699	27261694	27261699	+	1	0	0	0
hsa-miR-424-5p	ENSG00000186184	POLR1D	protein_coding	chr13	28240225	28240230	28240225	28240230	+	1	0	0	0
hsa-miR-424-5p	ENSG00000152520	PAN3	protein_coding	chr13	28866778	28866783	28866778	28866783	+	1	0	0	0
hsa-miR-424-5p	ENSG00000073910	FRY	protein_coding	chr13	32735302	32735330	32735302	32735330	+	0	0	0	0
hsa-miR-424-5p	ENSG00000073910	FRY	protein_coding	chr13	32745298	32745326	32745298	32745326	+	0	0	0	0
hsa-miR-424-5p	ENSG00000073910	FRY	protein_coding	chr13	32836477	32836498	32836477	32836498	+	0	0	0	0
hsa-miR-424-5p	ENSG00000073910	FRY	protein_coding	chr13	32870194	32870222	32870194	32870222	+	0	0	0	0
hsa-miR-424-5p	ENSG00000073910	FRY	protein_coding	chr13	32870320	32870325	32870305	32870326	+	1	1	0	0
hsa-miR-424-5p	ENSG00000083642	PDS5B	protein_coding	chr13	33247432	33247460	33247432	33247460	+	0	0	0	0
hsa-miR-424-5p	ENSG00000083642	PDS5B	protein_coding	chr13	33309383	33309411	33309383	33309411	+	0	0	0	0
hsa-miR-424-5p	ENSG00000083642	PDS5B	protein_coding	chr13	33320121	33320149	33320121	33320149	+	0	0	0	0
hsa-miR-424-5p	ENSG00000172915	NBEA	protein_coding	chr13	35738607	35738635	35738607	35738635	+	0	0	0	0
hsa-miR-424-5p	ENSG00000172915	NBEA	protein_coding	chr13	35782927	35782955	35782927	35782955	+	0	0	0	0
hsa-miR-424-5p	ENSG00000172915	NBEA	protein_coding	chr13	35926338	35926366	35926338	35926366	+	0	0	0	0
hsa-miR-424-5p	ENSG00000172915	NBEA	protein_coding	chr13	36229809	36229837	36229809	36229837	+	0	0	0	0
hsa-miR-424-5p	ENSG00000172915	NBEA	protein_coding	chr13	36245317	36245322	36245295	36245323	+	1	0	1	0
hsa-miR-424-5p	ENSG00000150893	FREM2	protein_coding	chr13	39261561	39261577	39261549	39261589	+	0	0	0	0
hsa-miR-424-5p	ENSG00000150893	FREM2	protein_coding	chr13	39265102	39265130	39265102	39265130	+	0	0	0	0
hsa-miR-424-5p	ENSG00000150893	FREM2	protein_coding	chr13	39455033	39455038	39455011	39455039	+	1	0	0	0
hsa-miR-424-5p	ENSG00000150893	FREM2	protein_coding	chr13	39455615	39455643	39455615	39455643	+	0	0	0	0
hsa-miR-424-5p	ENSG00000188811	NHLRC3	protein_coding	chr13	39622455	39622460	39622455	39622460	+	1	0	0	0
hsa-miR-424-5p	ENSG00000023516	AKAP11	protein_coding	chr13	42869842	42869870	42869842	42869870	+	0	0	0	0
hsa-miR-424-5p	ENSG00000023516	AKAP11	protein_coding	chr13	42873512	42873540	42873512	42873540	+	0	0	0	0
hsa-miR-424-5p	ENSG00000023516	AKAP11	protein_coding	chr13	42893688	42893693	42893666	42893694	+	1	1	1	1
hsa-miR-424-5p	ENSG00000136152	COG3	protein_coding	chr13	46108986	46108992	46108986	46108992	+	1	0	0	1
hsa-miR-424-5p	ENSG00000102531	FNDC3A	protein_coding	chr13	49782488	49782494	49782471	49782495	+	1	1	0	0
hsa-miR-424-5p	ENSG00000102531	FNDC3A	protein_coding	chr13	49782602	49782607	49782602	49782607	+	1	0	0	0
hsa-miR-424-5p	ENSG00000102543	CDADC1	protein_coding	chr13	49866669	49866675	49866652	49866676	+	1	1	0	0
hsa-miR-424-5p	ENSG00000152213	ARL11	protein_coding	chr13	50205929	50205935	50205929	50205935	+	1	0	0	0
hsa-miR-424-5p	ENSG00000139668	WDFY2	protein_coding	chr13	52334478	52334483	52334478	52334483	+	1	0	0	0
hsa-miR-424-5p	ENSG00000139668	WDFY2	protein_coding	chr13	52340783	52340789	52340783	52340789	+	0	0	0	1
hsa-miR-424-5p	ENSG00000253710	ALG11	protein_coding	chr13	52602932	52602937	52602932	52602937	+	1	0	0	0
hsa-miR-424-5p	ENSG00000253797	UTP14C	protein_coding	chr13	52602932	52602937	52602932	52602937	+	1	0	0	0
hsa-miR-424-5p	ENSG00000139675	HNRNPA1L2	protein_coding	chr13	53217697	53217702	53217697	53217702	+	1	0	0	0
hsa-miR-424-5p	ENSG00000165416	SUGT1	protein_coding	chr13	53233328	53233348	53233328	53233348	+	0	1	0	0
hsa-miR-424-5p	ENSG00000118946	PCDH17	protein_coding	chr13	58299533	58299539	58299512	58299540	+	1	1	1	1
hsa-miR-424-5p	ENSG00000083544	TDRD3	protein_coding	chr13	61068601	61068629	61068601	61068629	+	0	0	0	0
hsa-miR-424-5p	ENSG00000136153	LMO7	protein_coding	chr13	76432128	76432134	76432107	76432135	+	1	1	0	1
hsa-miR-424-5p	ENSG00000136153	LMO7	protein_coding	chr13	76432697	76432702	76432675	76432703	+	1	0	0	0
hsa-miR-424-5p	ENSG00000183098	GPC6	protein_coding	chr13	95056738	95056744	95056724	95056745	+	0	1	1	1
hsa-miR-424-5p	ENSG00000152749	GPR180	protein_coding	chr13	95279862	95279868	95279848	95279869	+	1	1	0	0
hsa-miR-424-5p	ENSG00000139793	MBNL2	protein_coding	chr13	98043750	98043756	98043729	98043757	+	1	1	0	1
hsa-miR-424-5p	ENSG00000152767	FARP1	protein_coding	chr13	99100599	99100604	99100599	99100604	+	1	0	0	0
hsa-miR-424-5p	ENSG00000198542	ITGBL1	protein_coding	chr13	102370258	102370278	102370258	102370278	+	0	1	0	0
hsa-miR-424-5p	ENSG00000139826	ABHD13	protein_coding	chr13	108884564	108884585	108884564	108884585	+	0	1	0	0
hsa-miR-424-5p	ENSG00000102524	TNFSF13B	protein_coding	chr13	108960782	108960789	108960782	108960789	+	0	0	0	1
hsa-miR-424-5p	ENSG00000068650	ATP11A	protein_coding	chr13	113512516	113512544	113512516	113512544	+	0	0	0	0
hsa-miR-424-5p	ENSG00000068650	ATP11A	protein_coding	chr13	113530146	113530174	113530146	113530174	+	0	0	0	0
hsa-miR-424-5p	ENSG00000068650	ATP11A	protein_coding	chr13	113536701	113536707	113536680	113536708	+	1	0	0	0
hsa-miR-424-5p	ENSG00000068650	ATP11A	protein_coding	chr13	113537535	113537540	113537513	113537541	+	1	0	0	0
hsa-miR-424-5p	ENSG00000068650	ATP11A	protein_coding	chr13	113537564	113537569	113537542	113537570	+	1	0	0	0
hsa-miR-424-5p	ENSG00000068650	ATP11A	protein_coding	chr13	113540220	113540225	113540198	113540226	+	1	0	0	0
hsa-miR-424-5p	ENSG00000185896	LAMP1	protein_coding	chr13	113977146	113977152	113977146	113977152	+	1	0	0	0
hsa-miR-424-5p	ENSG00000150403	TMCO3	protein_coding	chr13	114203920	114203925	114203920	114203925	+	1	0	0	0
[truncated: 5,478 more rows]
